# Supplementary material for: An Increase in HSF1 Expression Directs Human Mammary Epithelial Cells toward a Mesenchymal Phenotype
Source: Preprints.org preprint supplement (doi:10.20944/preprints202309.1118.v1), 2023-09-18
Supplement: Supplementary file 1 [file supplementary]

## Sheet: up in HSF1-pLVX
	MCF10A_WT_rep1	MCF10A_HSF1-pLVX_rep1	FOLD CHANGE HSF1-pLVX_1 vs WT_rep1	MCF10A_WT_rep2	MCF10A_HSF1-pLVX_rep2	FOLD CHANGE HSF1-pLVX_2 vs WT_rep2	mean FOLD CHANGE
TTC25	4.24112	11.304	133.7	4.11978	11.3701	152.253	142.977
NGFR	5.58142	11.8289	75.9789	5.34201	11.8589	91.5753	83.7771
CD14	5.3153	10.2229	30.0148	4.65962	10.7218	66.8165	48.4157
AQP3	6.6055	11.4955	29.6509	6.5016	11.8753	41.4617	35.5563
FGFR3	6.13998	10.4629	20.0142	5.8719	10.7347	29.0962	24.5552
IQGAP2	4.12738	8.476	20.3734	4.23273	8.75155	22.9245	21.649
S100A7	5.03428	9.33405	19.6951	5.0722	9.55616	22.3773	21.0362
CA12	8.07956	12.1693	17.0265	7.9026	12.4557	23.4761	20.2513
SDK2	5.08562	9.20483	17.3782	5.02113	9.3139	19.5999	18.4891
CADM3	4.34254	7.42929	8.49582	3.11789	7.93489	28.1878	18.3418
DLK2	6.16279	10.1238	15.5736	5.89907	10.2814	20.8557	18.2147
SNCAIP	4.98075	8.59144	12.2159	4.50891	8.78173	19.3307	15.7733
SULT1E1	4.59751	8.27782	12.8199	4.33347	8.54029	18.4662	15.6431
CSF3	4.34254	8.46949	17.4717	4.79266	8.30656	11.4233	14.4475
CEACAM6	4.34254	8.33267	15.891	4.4249	8.11435	12.9013	14.3961
G0S2	7.59196	11.2833	12.9178	7.40458	11.1743	13.6396	13.2787
IL1B	8.38218	12.2956	15.0679	8.8844	12.3917	11.371	13.2195
NECAB2	3.6303	7.20408	11.9073	3.62633	7.43245	13.9881	12.9477
CUX2	6.77658	9.90254	8.72987	6.14502	10.2204	16.8577	12.7938
PLA2G2A	3.83884	7.18826	10.1924	4.11978	7.90471	13.7841	11.9883
OLFM4	5.80358	9.22622	10.723	5.89907	9.59632	12.9713	11.8471
PHGDH	8.47939	11.8283	10.1889	8.20411	11.9595	13.5043	11.8466
S100P	6.25046	9.82437	11.9084	5.89907	9.44954	11.7165	11.8125
FAT2	9.22459	12.7041	11.1544	9.08878	12.7264	12.4464	11.8004
TP73	5.35674	8.87371	11.4476	5.45855	9.03096	11.896	11.6718
TNNI2	8.18216	11.7381	11.7613	8.44429	11.8391	10.5182	11.1398
ABCA6	5.13495	8.22853	8.53611	5.0722	8.8466	13.6839	11.11
LRP4	5.4738	8.7952	9.99636	5.21414	8.78835	11.9109	10.9536
CDCA7	6.16279	9.50767	10.1604	6.05179	9.54448	11.2566	10.7085
ADH1B	3.11789	6.00591	7.40252	3.11789	6.86892	13.464	10.4332
CD1D	4.34254	7.55783	9.28751	4.23273	7.74353	11.3987	10.3431
IP6K3	3.83884	7.10642	9.63034	3.8333	7.29939	11.0509	10.3406
FRG1	3.11789	6.76566	12.534	3.11789	6.10602	7.93445	10.2342
TP63	7.86321	11.0675	9.21725	7.636	11.1203	11.1909	10.2041
LTF	3.83884	6.8078	7.82973	3.62633	7.26172	12.4269	10.1283
TENM2	3.83884	7.09798	9.57412	3.8333	7.24251	10.6237	10.0989
FEZ1	6.88925	10.1321	9.46651	6.88312	10.3001	10.681	10.0738
CAMK2B	5.74371	8.75829	8.08128	5.665	9.11499	10.9282	9.50476
CDT1	7.8214	10.6751	7.22825	7.41385	10.9602	11.6832	9.45574
ADA	7.46186	10.548	8.49225	7.45035	10.7183	9.63272	9.06248
GLUL	12.1922	14.9808	6.90954	11.9854	15.4443	10.9962	8.95284
CLEC2B	4.67075	7.64721	7.87053	4.96788	8.26442	9.82561	8.84807
HAS3	5.91604	9.12632	9.25531	6.12229	9.17178	8.27921	8.76726
CSTA	9.25627	12.0636	6.99988	9.15921	12.5035	10.1562	8.57806
TSPYL2	8.2148	10.9878	6.83537	7.80744	11.0938	9.75637	8.29587
INTS3	3.83884	7.16419	10.0238	4.23273	6.88143	6.27099	8.14739
SYT8	10.1819	13.0325	7.21316	10.0302	13.2087	9.05364	8.1334
CERS4	4.80456	7.65297	7.20208	4.72804	7.90471	9.04219	8.12213
CA9	3.6303	6.45635	7.09131	3.62633	6.80471	9.05292	8.07212
COL2A1	3.99644	6.8386	7.17093	3.8333	6.98928	8.91342	8.04217
GPC6	4.86618	7.86646	8.00158	4.91223	7.9108	7.99206	7.99682
TREM1	4.24112	6.72224	5.58332	3.62633	6.98928	10.2884	7.93588
PLIN4	5.61546	8.57637	7.7861	5.75752	8.76839	8.06054	7.92332
PGF	6.35287	9.33226	7.88648	6.519	9.47438	7.75635	7.82142
CPAMD8	6.48481	9.37467	7.41198	6.21108	9.23614	8.14017	7.77607
PI3	7.97544	10.8809	7.4927	7.84899	10.8308	7.89954	7.69612
LARGE2	5.77397	8.50175	6.62437	5.69654	8.82423	8.74033	7.68235
ATP6V1B1	3.6303	6.5589	7.61369	3.8333	6.77819	7.70018	7.65693
UNC5B	8.204	10.966	6.78347	8.11045	11.1686	8.32914	7.5563
KCNK5	5.68109	8.68713	8.03354	5.95187	8.77174	7.061	7.54727
ICOSLG	4.5191	7.495	7.86744	4.65962	7.50674	7.19562	7.53153
EFNB3	5.08562	7.79007	6.51809	4.96788	8.033	8.36941	7.44375
DDIT4	10.5328	13.3784	7.18802	10.536	13.4596	7.58733	7.38767
SLC16A7	5.3153	8.14925	7.13024	5.25817	8.15079	7.42618	7.27821
RAMP1	5.22826	7.62391	5.26214	4.72804	7.9108	9.08041	7.17127
NIPAL4	7.62476	10.1847	5.89674	7.34767	10.4072	8.33684	7.11679
RAB7B	5.08562	7.81599	6.63625	5.0722	7.98189	7.5146	7.07542
IL1A	9.83031	12.8404	8.05612	10.1121	12.7158	6.07881	7.06746
TSC22D3	8.87601	11.5563	6.40966	8.83705	11.7777	7.67735	7.04351
DCN	3.6303	6.52131	7.41788	3.98976	6.70966	6.58825	7.00306
RAPGEFL1	7.2468	9.89528	6.27005	7.17293	10.1242	7.7344	7.00222
WNT4	5.51064	7.98541	5.5588	5.21414	8.28798	8.42017	6.98948
IGFBP2	6.67012	8.9737	4.93682	6.46615	9.64272	9.04152	6.98917
ACKR1	3.11789	6.00591	7.40252	3.62633	6.32488	6.49151	6.94702
GABRE	8.04971	10.887	7.14699	8.05237	10.8	6.71604	6.93152
ZBTB7C	6.02004	8.65019	6.1909	6.07569	8.98847	7.53069	6.8608
C1R	7.73397	10.0129	4.85334	7.38586	10.5068	8.69979	6.77656
MYB	4.34254	7.2881	7.70375	4.33347	6.86892	5.79757	6.75066
ARHGAP25	5.51064	8.04796	5.80512	5.45855	8.38293	7.59149	6.6983
HMGB2	8.27794	10.9161	6.22517	8.05828	10.8989	7.16305	6.69411
CLIC2	5.54649	8.1121	5.92003	5.25817	8.15592	7.45264	6.68633
EME1	5.18245	7.64142	5.49822	4.72804	7.702	7.85691	6.67756
CCL20	5.54649	8.38897	7.17249	5.78702	8.396	6.10073	6.63661
ERFE	4.12738	6.8386	6.54875	4.4249	7.16298	6.67181	6.61028
CREG1	11.1537	13.7575	6.0786	11.0936	13.9288	7.13631	6.60746
EBI3	5.64867	8.11627	5.53122	5.30076	8.23078	7.6212	6.57621
MMP7	6.63817	9.0367	5.27263	6.5016	9.45579	7.74995	6.51129
RIN1	8.96179	11.5126	5.85969	8.93024	11.7601	7.11003	6.48486
LOXL2	9.34489	11.9189	5.95446	9.09166	11.8938	6.97491	6.46469
BCO2	4.86618	7.61803	6.7358	5.0722	7.69496	6.15929	6.44755
PTGS1	5.91604	8.24388	5.02054	5.45855	8.43451	7.86778	6.44416
DNAH3	4.24112	6.9649	6.60602	4.11978	6.76475	6.25483	6.43042
S100A2	13.0736	15.5782	5.67504	12.9896	15.7827	6.93103	6.30304
ITGA10	6.35287	8.75829	5.29788	6.14502	8.9682	7.07722	6.18755
SPC24	6.22905	8.8663	6.22146	6.21108	8.81777	6.09103	6.15625
S100A14	12.3602	14.8517	5.62364	12.3253	15.0635	6.67202	6.14783
CDC25B	10.0853	12.5607	5.56148	10.006	12.7533	6.71474	6.13811
TFAP4	6.41093	8.98971	5.97431	6.519	9.16671	6.26671	6.12051
GJA1	3.11789	5.7665	6.27061	3.11789	5.68104	5.90997	6.09029
EGR3	5.4738	8.12873	6.29816	5.95187	8.49648	5.83452	6.06634
MYC	10.7224	13.3981	6.3896	10.8428	13.3638	5.73976	6.06468
BDKRB2	7.09097	9.64251	5.8626	7.05922	9.68767	6.18358	6.02309
PDCD4	9.99427	12.4894	5.63763	9.93871	12.6185	6.40743	6.02253
SLC6A15	7.44359	10.0085	5.91703	7.34767	9.96245	6.12533	6.02118
PTTG1	8.41063	10.7332	5.0024	7.88938	10.7017	7.0243	6.01335
ARMCX3	5.4738	8.15738	6.42449	5.53094	7.99913	5.53351	5.979
MT1E	10.5784	12.8125	4.70481	10.3231	13.178	7.23488	5.96984
PSAT1	9.15346	11.6959	5.82574	9.16196	11.7722	6.10626	5.966
RAD54L	5.68109	8.43314	6.73672	5.95187	8.30656	5.11485	5.92578
LRRC55	3.6303	5.89138	4.79351	3.11789	5.92214	6.98494	5.88922
ZGRF1	5.77397	8.27782	5.67198	5.63271	8.23563	6.07518	5.87358
NECTIN1	11.4629	13.8771	5.33014	11.3571	14.0252	6.35566	5.8429
TOP2A	9.45137	11.9736	5.74483	9.13145	11.6894	5.88858	5.81671
SOD2	12.5387	14.8438	4.94196	12.256	14.9978	6.68912	5.81554
QRFPR	5.43591	7.79529	5.13149	5.12128	7.81668	6.47733	5.80441
BMP6	3.99644	6.37425	5.19748	3.62633	6.30634	6.4086	5.80304
PAN2	7.40633	9.9617	5.87817	7.56293	10.06	5.64552	5.76185
CEL	6.06926	8.45638	5.23111	6.09918	8.73108	6.19841	5.71476
CD70	7.64887	9.93951	4.89272	7.30843	10.0043	6.47933	5.68603
MT1X	6.63817	8.80299	4.48408	6.75724	9.51086	6.74408	5.61408
S100A8	8.67966	10.7688	4.25494	8.52335	11.3247	6.97106	5.613
TNFSF10	8.23085	10.4514	4.6608	8.13863	10.8356	6.4842	5.5725
TROAP	6.58887	8.93878	5.09791	6.29459	8.88726	6.03212	5.56502
SLC1A5	10.3794	12.5707	4.56694	10.1135	12.8259	6.55415	5.56055
KNTC1	7.73397	10.3743	6.23462	7.99801	10.2767	4.85252	5.54357
ADSSL1	5.39692	7.84648	5.46253	5.665	8.14564	5.58146	5.52199
CENPH	6.16279	8.78475	6.15588	6.37343	8.66066	4.88118	5.51853
SEMA6B	5.39692	7.66443	4.81494	5.21414	7.84239	6.18277	5.49886
CASP14	9.13937	11.1431	4.01032	8.71515	11.5153	6.96514	5.48773
ESPL1	6.62193	9.18907	5.92632	6.53619	8.86864	5.03659	5.48146
KDR	5.77397	8.04796	4.8366	5.49523	8.10906	6.12127	5.47893
DQX1	4.9248	7.31018	5.22482	5.30076	7.81668	5.71964	5.47223
JAM3	3.6303	6.34579	6.56817	4.23273	6.30634	4.20936	5.38877
CDH13	9.34489	11.5851	4.72478	9.18375	11.7772	6.03561	5.38019
CXCL14	4.34254	6.443	4.28846	3.98976	6.66689	6.39582	5.34214
CDC45	6.90272	9.10338	4.59688	6.44809	9.04484	6.04926	5.32307
METTL7A	8.15439	10.4817	5.01853	8.03448	10.5158	5.58426	5.3014
PRIM1	6.3128	8.67586	5.14462	6.00272	8.43028	5.3798	5.26221
ASNS	9.1337	11.4207	4.88053	9.05371	11.5483	5.63581	5.25817
ORC1	6.5378	8.77158	4.70366	6.39246	8.91172	5.73287	5.21826
HELLS	7.46186	9.97899	5.72439	7.61206	9.84673	4.70657	5.21548
RGS16	5.03428	7.15608	4.35237	4.58682	7.18328	6.04799	5.20018
SOX7	7.03094	9.4625	5.39479	7.20536	9.51086	4.94338	5.16909
CACNG8	5.08562	7.39527	4.95765	4.91223	7.3361	5.36608	5.16186
KCP	6.48481	8.62989	4.42317	6.27418	8.83066	5.8827	5.15294
SEMA6A	5.13495	7.24288	4.31071	5.0722	7.63001	5.88813	5.09942
NRG1	6.91608	9.232	4.97923	6.81456	9.19688	5.21374	5.09649
TNFAIP2	11.8313	14.3298	5.65119	11.8373	14.0201	4.54015	5.09567
STAT4	6.18522	8.59443	5.31183	6.16739	8.45129	4.86994	5.09089
ATP12A	4.34254	6.58341	4.72684	3.62633	6.06228	5.41121	5.06902
CIT	7.18208	9.5266	5.07893	6.86967	9.19936	5.027	5.05296
NASP	9.12514	11.3844	4.78759	9.10885	11.4998	5.24488	5.01624
CLCA2	10.0191	12.1278	4.31293	9.84098	12.3568	5.71912	5.01602
SRGAP3	8.96818	11.3135	5.08189	9.02985	11.3361	4.94585	5.01387
RP11-309L24.4	5.08562	7.39527	4.95765	5.53094	7.86764	5.05148	5.00456
PPARGC1B	5.71276	8.18547	5.55085	6.09918	8.25489	4.45588	5.00337
TNIP3	5.18245	7.65297	5.54243	5.53094	7.68789	4.45971	5.00107
CP	3.6303	6.30199	6.37176	3.98976	5.84637	3.62156	4.99666
NT5M	4.12738	5.93062	3.49002	3.62633	6.32488	6.49151	4.99077
KIF14	6.33298	8.78737	5.48082	6.23243	8.396	4.48022	4.98052
HSF1	12.0295	14.2717	4.73094	11.9094	14.2942	5.22276	4.97685
CH507-9B2.1	4.12738	6.27202	4.4218	4.11978	6.5773	5.49272	4.95726
CPE	7.80004	9.86832	4.19387	7.59587	10.1098	5.71161	4.95274
BGN	4.34254	6.64292	4.92587	4.23273	6.54613	4.97053	4.9482
WHRN	6.37249	8.6004	4.68454	6.41125	8.78173	5.17113	4.92783
MND1	5.71276	7.56396	3.60802	5.12128	7.74353	6.15708	4.88255
FANCA	7.32878	9.57894	4.75733	7.22657	9.54448	4.98608	4.87171
TIMP3	11.7131	13.5913	3.67606	11.3457	13.9204	5.95757	4.81682
FAM131B	6.13998	8.00356	3.63909	5.53094	8.11435	5.99354	4.81631
SERPINA3	4.12738	6.78689	6.31816	4.91223	6.63765	3.30677	4.81246
GPR173	4.12738	6.70003	5.94898	4.4249	6.28754	3.63673	4.79286
MMP9	7.57528	10.277	6.50579	8.03448	9.65544	3.07581	4.7908
KRT15	13.8354	15.9487	4.32654	13.9082	16.3006	5.25037	4.78846
CENPF	8.66399	10.7434	4.22634	8.0817	10.4907	5.31106	4.7687
ATAD5	5.68109	8.07396	5.252	5.8719	7.97029	4.2823	4.76715
MUC4	4.73957	7.19619	5.48929	4.33347	6.34319	4.02702	4.75815
TSHZ2	7.01862	8.91022	3.71047	6.65101	9.18438	5.78926	4.74987
SALL2	4.73957	6.88851	4.43502	4.4249	6.76475	5.0625	4.74876
DTL	7.26774	9.36944	4.29214	7.05922	9.43906	5.20478	4.74846
CPNE7	8.41999	10.624	4.60745	8.62642	10.9148	4.88513	4.74629
TNFAIP6	3.6303	6.25679	6.1752	4.33347	6.06228	3.31453	4.74486
PAG1	4.80456	6.58341	3.43153	4.11978	6.70966	6.02048	4.72601
CA11	5.61546	7.80568	4.56373	5.8159	8.08774	4.82939	4.69656
CLU	8.97772	10.9781	4.00109	8.73743	11.1667	5.38627	4.69368
PEAR1	6.41093	8.8261	5.33381	6.61914	8.63517	4.0447	4.68926
TRABD2A	7.44359	9.63672	4.57294	7.33796	9.58115	4.73445	4.6537
RAB38	8.1088	10.1228	4.03894	8.04643	10.4401	5.25497	4.64696
GAL3ST4	5.27251	7.28066	4.02267	4.91223	7.30866	5.26498	4.64383
CEBPD	8.74812	10.8956	4.43042	8.81976	11.0945	4.83894	4.63468
CKAP2L	7.25731	9.22622	3.91472	6.60293	9.01975	5.33991	4.62732
FAM43A	6.74697	8.93878	4.56879	7.01108	9.23129	4.65961	4.6142
SLC43A1	4.24112	5.94983	3.26868	3.98976	6.5618	5.94649	4.60759
CDK1	7.81432	9.9524	4.40176	7.45035	9.68767	4.71519	4.55847
MCM7	10.1043	12.1352	4.08686	9.8915	12.2172	5.01313	4.54999
TTK	6.84803	9.18907	5.06666	6.80044	8.80803	4.02109	4.54387
PIF1	5.83256	8.04796	4.64409	5.63271	7.77724	4.42151	4.5328
SEMA4B	9.76023	11.8126	4.148	9.71946	12.0166	4.91476	4.53138
POLQ	6.57205	8.80557	4.70281	6.44809	8.5559	4.31037	4.50659
KLF7	9.6028	11.8184	4.64481	9.7007	11.8255	4.36145	4.50313
NCAPH	6.73192	8.85885	4.36785	6.48399	8.69277	4.62286	4.49535
FHL1	8.66399	10.6947	4.08609	8.48875	10.7777	4.88702	4.48655
TKT	12.8683	14.8411	3.92521	12.6156	14.9499	5.04293	4.48407
ERVMER34-1	7.75633	9.70202	3.8522	7.32818	9.68234	5.11297	4.48259
TRAIP	5.83256	7.91523	4.23588	5.72737	7.94679	4.65705	4.44647
WDR76	7.07916	9.12425	4.12697	6.81456	9.06679	4.7642	4.44558
DYNC2H1	7.62476	9.53909	3.7694	7.29845	9.65363	5.11659	4.443
CSF1	8.93919	10.9515	4.03429	8.85754	11.1353	4.84912	4.44171
ATG16L2	8.24672	10.4889	4.73116	8.46224	10.5148	4.14854	4.43985
CDCA5	8.2572	10.2373	3.94531	7.88273	10.1832	4.92608	4.4357
JAG2	9.90049	11.8366	3.8266	9.69881	12.0236	5.00998	4.41829
RERG	3.6303	5.58001	3.86297	3.11789	5.42373	4.94455	4.40376
BUB1B	7.22555	9.36067	4.39274	6.96126	9.09376	4.38477	4.38875
MB21D1	6.90272	8.99651	4.26868	6.82854	8.9682	4.4066	4.33764
SMIM10L2A	5.22826	7.25811	4.08362	5.16855	7.36303	4.57723	4.33043
FYB	7.93028	10.1341	4.60709	8.07588	10.0898	4.0388	4.32295
GXYLT2	5.68109	8.00806	5.0175	6.02747	7.88011	3.61159	4.31455
HTRA1	9.7894	11.7105	3.78703	9.63698	11.9125	4.84178	4.31441
KIF18B	6.98102	9.09706	4.33501	6.75724	8.85924	4.29304	4.31403
CDCA7L	7.83547	9.82819	3.97986	7.7354	9.94775	4.63429	4.30707
C19orf48	9.32012	11.1507	3.55688	9.1117	11.4474	5.048	4.30244
CBS	4.43456	6.86876	5.40463	4.72804	6.39672	3.17923	4.29193
ECHDC3	6.4667	8.47275	4.01679	6.39246	8.57134	4.528	4.2724
NEK2	6.39184	8.1735	3.43819	5.72737	8.07696	5.09679	4.26749
FGR	3.6303	5.58001	3.86297	3.62633	5.84637	4.65908	4.26103
NPM3	8.32852	10.1464	3.5257	8.04047	10.3535	4.9693	4.2475
EREG	8.77754	11.067	4.88874	9.00864	10.8515	3.58709	4.23791
PTPRS	9.7894	11.7139	3.79608	9.45186	11.6778	4.67828	4.23718
KIF2C	7.38734	9.63381	4.74521	7.47712	9.37454	3.72546	4.23534
MUTYH	6.42977	8.53019	4.28834	6.71268	8.77508	4.17681	4.23257
SLC1A4	7.05525	9.12838	4.20799	7.20536	9.29311	4.25084	4.22941
CCL2	3.83884	6.14528	4.94661	4.11978	5.92214	3.48791	4.21726
KIF18A	6.79116	8.98515	4.57569	6.66668	8.60923	3.84385	4.20977
RPS6KA5	5.74371	7.61212	3.65131	5.63271	7.88011	4.74827	4.19979
NDRG1	11.5702	13.3373	3.40367	11.3559	13.6739	4.98632	4.19499
RIBC2	4.34254	6.16176	3.52891	4.11978	6.39672	4.8465	4.1877
SLC25A37	10.4734	12.6761	4.60358	10.728	12.6415	3.76718	4.18538
DGAT2	5.96901	8.02593	4.16098	6.00272	8.07154	4.19541	4.17819
ALDH7A1	10.3031	12.1855	3.68679	10.1388	12.3445	4.61296	4.14988
BRCA1	7.84941	9.82564	3.93466	7.52922	9.65182	4.35478	4.14472
FKBP5	12.0291	13.8836	3.61613	11.7973	14.0216	4.67284	4.14449
ASPM	7.80004	10.0107	4.6289	7.72055	9.58686	3.64599	4.13745
IMPA2	6.77658	8.66451	3.70103	6.74254	8.92079	4.52604	4.11354
2004-09-01	3.83884	5.74454	3.7469	3.98976	6.14844	4.46505	4.10598
HMMR	7.39687	9.59397	4.58559	7.35731	9.21173	3.61605	4.10082
RYR1	4.59751	6.72224	4.36124	4.72804	6.66689	3.83401	4.09762
C5	5.71276	7.70939	3.99067	5.8159	7.88011	4.18204	4.08636
SLC25A27	5.99476	7.90561	3.7603	6.00272	8.14047	4.40074	4.08052
LRG1	7.87006	9.6526	3.44033	7.56293	9.79673	4.70371	4.07202
COL27A1	8.48831	10.5831	4.27163	8.6618	10.6132	3.86745	4.06954
ZBTB16	8.0376	9.80123	3.39553	7.77187	10.0071	4.70842	4.05198
DLGAP5	7.41574	9.49971	4.23972	7.25782	9.20432	3.85439	4.04705
IQGAP3	7.85632	9.88064	4.06798	7.67505	9.67879	4.01037	4.03918
CHTF18	7.86321	9.89891	4.10024	7.896	9.88583	3.9719	4.03607
RPL22L1	9.6393	11.6201	3.94705	9.73061	11.7739	4.1219	4.03448
PRTG	3.83884	5.94983	4.31988	3.8333	5.7384	3.74534	4.03261
FAM153B	4.12738	6.24139	4.32891	4.33347	6.22961	3.72214	4.02553
NDC80	7.0062	8.99878	3.97948	6.65101	8.67502	4.06713	4.02331
GMNN	7.48884	9.41249	3.79379	7.35731	9.44326	4.24554	4.01967
KIF4A	7.57528	9.32506	3.36307	6.72768	8.9506	4.66837	4.01572
LMNB1	8.18765	10.1556	3.91205	7.82837	9.8625	4.09577	4.00391
TREM2	4.9248	6.87867	3.87411	5.02113	7.06788	4.13175	4.00293
DOCK10	6.63817	8.84383	4.61283	6.81456	8.57517	3.38842	4.00063
SEC31B	6.94241	8.95983	4.04859	7.22657	9.20926	3.95229	4.00044
UNC45B	3.11789	4.99184	3.66534	3.11789	5.23335	4.33328	3.99931
CHEK2	6.68582	8.57637	3.70775	6.41125	8.50455	4.26722	3.98748
PIGR	3.11789	5.33384	4.64585	3.62633	5.35085	3.30471	3.97528
PTGIR	3.11789	5.06797	3.86395	3.11789	5.14866	4.08623	3.97509
TYMS	8.37738	10.3065	3.80826	8.28702	10.3322	4.1271	3.96768
RCSD1	4.34254	6.46958	4.36822	3.98976	5.82016	3.55636	3.96229
BRCA2	6.35287	8.47275	4.34655	6.21108	8.04964	3.57653	3.96154
C17orf50	4.12738	6.09463	3.91021	3.98976	5.99397	4.01169	3.96095
CDC7	6.18522	8.13697	3.86843	6.09918	8.11435	4.04227	3.95535
TMEM91	5.4738	7.24288	3.40838	5.30076	7.46594	4.48523	3.9468
HPRT1	7.93028	9.91696	3.96324	7.84215	9.81629	3.92894	3.94609
KIF15	3.11789	5.42105	4.93536	3.11789	4.67476	2.94214	3.93875
YBX2	4.34254	6.02411	3.20777	3.98976	6.20975	4.65889	3.93333
MAD2L1	7.31879	9.28114	3.89697	6.98639	8.97402	3.96586	3.93141
PSRC1	6.70136	8.81331	4.32275	6.68218	8.50455	3.53662	3.92969
RAB36	6.20731	8.04796	3.58173	6.09918	8.19134	4.26385	3.92279
NUF2	5.71276	7.82622	4.3273	5.89907	7.702	3.48928	3.90829
MTBP	5.68109	7.86149	4.53279	6.07569	7.79051	3.28257	3.90768
MPHOSPH9	5.99476	8.27035	4.84196	6.48399	8.05515	2.97143	3.90669
SPX	3.83884	5.91114	4.20557	4.11978	5.97044	3.60666	3.90611
AURKB	6.88925	8.81331	3.79489	6.58654	8.58281	3.98968	3.89229
GREB1	4.34254	6.34579	4.00903	4.33347	6.24918	3.77299	3.89101
EDARADD	4.9248	7.09798	4.51014	5.30076	6.98928	3.22326	3.8667
GPR4	3.6303	5.36355	3.32476	3.62633	5.7662	4.40723	3.86599
KIF20A	8.64017	10.4792	3.57776	8.0875	10.1137	4.07338	3.82557
TLL1	5.35674	6.5589	2.30083	4.4249	6.84358	5.34684	3.82383
TNFRSF1B	3.6303	5.24042	3.05278	3.11789	5.31284	4.57875	3.81576
C1QL1	3.6303	5.72221	4.26313	3.98976	5.7384	3.36041	3.81177
POLD1	8.34827	10.2239	3.66955	8.24097	10.2093	3.91314	3.79134
HNRNPA1	12.2316	14.0713	3.5793	12.2252	14.2255	4.00096	3.79013
NUSAP1	7.94333	9.88553	3.84292	7.72055	9.61692	3.72276	3.78284
TFPI2	8.19857	10.0839	3.69436	8.33164	10.2779	3.85379	3.77407
GLB1L2	7.81432	9.41757	3.03827	7.31834	9.48868	4.50128	3.76977
C17orf53	6.35287	8.27409	3.78742	6.27418	8.18131	3.75063	3.76902
NRG2	4.5191	6.34579	3.54722	4.72804	6.72363	3.98779	3.76751
BEGAIN	5.22826	6.8386	3.05324	4.79266	6.95423	4.47402	3.76363
TMPRSS4	8.67185	10.5457	3.66509	8.6618	10.6104	3.85996	3.76252
SHMT2	10.7205	12.3852	3.17042	10.4985	12.6138	4.33294	3.75168
WDHD1	7.48884	9.22622	3.33428	7.19463	9.25299	4.16512	3.7497
ID1	10.5144	12.3931	3.67766	10.3108	12.2424	3.81501	3.74634
MKI67	10.3331	12.1057	3.41647	9.70258	11.7252	4.0631	3.73979
ASF1B	7.19307	9.06504	3.6603	6.94853	8.88108	3.81728	3.73879
THSD1	7.54989	9.41926	3.65371	7.52067	9.45371	3.81859	3.73615
ARHGEF25	4.34254	6.38827	4.12884	4.50891	6.24918	3.341	3.73492
VIM	7.89714	9.8977	4.00157	8.22002	10.0114	3.46136	3.73147
UBE2C	7.77105	9.68807	3.77642	7.6439	9.5248	3.68304	3.72973
FAM129A	7.75633	9.64396	3.70026	7.61206	9.52083	3.75489	3.72757
PGLYRP4	6.39184	8.06102	3.18032	5.84418	7.93489	4.25956	3.71994
D2HGDH	7.58365	9.36944	3.44807	7.57949	9.57543	3.98874	3.7184
MTHFD2L	6.55503	8.38897	3.56509	6.58654	8.53636	3.86328	3.71418
VEGFA	10.0252	11.9322	3.75025	10.1962	12.0749	3.67754	3.7139
PYCR1	7.2781	8.83372	2.93962	6.86967	9.03374	4.4818	3.71071
NCAPG	6.6055	8.66165	4.15877	6.58654	8.28798	3.25227	3.70552
COLCA2	3.6303	5.52909	3.729	3.8333	5.71002	3.67239	3.70069
PRKAG3	3.11789	5.36355	4.74253	3.8333	5.23335	2.63911	3.69082
MRGPRX3	5.61546	7.50779	3.71232	5.69654	7.56969	3.66333	3.68783
CENPJ	7.28838	9.0715	3.44169	7.0943	9.06679	3.92447	3.68308
MYBL2	8.41999	10.0461	3.08686	7.68273	9.7769	4.26979	3.67832
GINS2	7.34857	8.8933	2.9175	6.69751	8.84343	4.42575	3.67162
KCNH3	3.83884	5.89138	4.14837	4.11978	5.79345	3.19025	3.66931
BIRC5	8.12033	9.83959	3.29267	7.57124	9.58496	4.03824	3.66545
CNNM1	4.67075	6.28708	3.06596	4.4249	6.51427	4.25561	3.66079
MDM4	8.01923	10.1413	4.35324	8.54457	10.1045	2.94835	3.65079
NAV2	11.3439	13.0127	3.17952	11.1256	13.167	4.1164	3.64796
S100A7A	3.83884	5.06797	2.34426	3.11789	5.42373	4.94455	3.6444
FOXM1	8.22017	10.1464	3.80069	8.03448	9.83079	3.47332	3.637
RFC4	7.18208	9.14482	3.89801	7.31834	9.07223	3.37266	3.63533
DHRS9	4.43456	6.67746	4.73346	5.0722	6.41412	2.53489	3.63418
C21orf58	5.88877	7.91523	4.07404	6.12229	7.7971	3.19277	3.6334
PC	9.71155	11.3766	3.17134	9.51552	11.5469	4.08786	3.6296
S1PR5	5.61546	7.21973	3.0404	5.30076	7.37189	4.20215	3.62128
ETS2	10.0526	11.7932	3.34191	10.0615	12.024	3.89736	3.61963
CD82	11.3266	13.113	3.44968	11.23	13.1422	3.76361	3.60664
TMEM121	3.11789	4.86808	3.36402	3.11789	5.05797	3.83726	3.60064
C1S	7.12582	8.63863	2.85364	6.98639	9.09376	4.30907	3.58135
MCM10	6.74697	8.57939	3.56135	6.55317	8.40033	3.59791	3.57963
GINS1	6.68582	8.62404	3.83233	6.84238	8.57517	3.32371	3.57802
RFPL2	3.11789	5.13976	4.0611	3.11789	4.73762	3.07318	3.56714
ARHGEF19	5.77397	7.2352	2.75344	5.16855	7.29939	4.37974	3.56659
MCM5	9.62926	11.1774	2.92447	9.20521	11.2779	4.20664	3.56556
KIF11	7.8214	9.79994	3.94092	7.7354	9.40716	3.18604	3.56348
CHRNA3	3.83884	6.00591	4.49111	3.98976	5.38779	2.63541	3.56326
PKDCC	3.11789	4.77794	3.16027	3.11789	5.10412	3.96201	3.56114
CNTNAP3	5.61546	7.72041	4.30182	6.37343	7.86764	2.81711	3.55947
GAMT	5.80358	7.31747	2.85579	5.21414	7.29007	4.21617	3.53598
PLK1	8.34827	10.2807	3.81707	8.14421	9.84356	3.24755	3.53231
CDC25C	6.25046	7.62977	2.60145	5.45855	7.61516	4.45867	3.53006
STRA6	8.51476	10.5434	4.08013	8.57375	10.1489	2.97959	3.52986
FABP5	6.62193	8.48248	3.63146	6.88312	8.65704	3.41983	3.52565
CENPK	6.25046	8.29634	4.12926	6.58654	8.13008	2.91509	3.52217
C16orf74	8.24672	9.94068	3.23545	8.18802	10.1164	3.80616	3.52081
FRMD8	10.383	12.0898	3.26438	10.2642	12.1815	3.77716	3.52077
CDC42EP4	10.0764	11.7586	3.20918	9.90796	11.8443	3.8273	3.51824
EML1	5.99476	7.70385	3.26954	5.84418	7.75711	3.76572	3.51763
CLCA4	3.11789	4.91074	3.46497	3.62633	5.45872	3.56128	3.51313
SLC26A6	8.57883	10.3751	3.47332	8.82324	10.65	3.54737	3.51034
DEPDC1	6.57205	8.74757	4.51747	7.02327	8.343	2.4962	3.50684
GRAMD2	7.74146	9.54064	3.48022	7.76465	9.58115	3.52227	3.50124
GAS2L2	4.43456	6.19416	3.38603	4.50891	6.36126	3.61088	3.49846
IMPDH2	11.0944	12.6415	2.92232	10.8792	12.9003	4.05904	3.49068
HSPD1	11.8021	13.5401	3.33569	11.7304	13.5962	3.64482	3.49026
INTS6L	6.4667	8.40612	3.8355	6.71268	8.36089	3.13445	3.48497
ZEB2	4.43456	5.83036	2.63133	3.98976	6.10602	4.33569	3.48351
LAMA1	7.35836	8.98743	3.09314	7.21601	9.16162	3.85202	3.47258
BLMH	7.94333	9.70202	3.3839	7.94152	9.77357	3.56041	3.47215
WDR27	8.13177	10.1474	4.0437	8.5983	10.1268	2.88493	3.46432
LAPTM5	5.54649	6.65452	2.15551	5.0722	7.32701	4.77272	3.46412
VAV3	7.89041	9.54064	3.13884	7.66733	9.58876	3.78799	3.46341
NRGN	6.83403	8.49856	3.17011	6.519	8.42604	3.75038	3.46024
IL31RA	6.09323	7.98541	3.71194	5.89907	7.57737	3.20051	3.45622
PRR11	8.39648	10.3174	3.78673	8.43977	10.0777	3.1122	3.44946
TNS2	8.5278	10.3147	3.45074	8.50182	10.2756	3.41941	3.43508
IKBIP	7.92371	9.76715	3.58863	8.03448	9.74663	3.2765	3.43256
ANKRD65	5.4738	7.13972	3.17317	5.56572	7.44929	3.68988	3.43153
FANCE	6.6055	8.21302	3.04728	6.29459	8.22591	3.81402	3.43065
TRIML2	8.06172	10.0657	4.01097	8.14976	9.65725	2.84316	3.42707
STAC2	4.43456	5.7665	2.51741	3.98976	6.10602	4.33569	3.42655
KIRREL	9.5204	11.3644	3.59007	9.69881	11.4012	3.25441	3.42224
CYP26B1	5.77397	7.53303	3.38477	5.78702	7.57737	3.459	3.42188
EXO1	6.39184	8.19339	3.48594	6.12229	7.86764	3.35277	3.41936
FAM149A	4.12738	5.72221	3.02059	3.98976	5.92214	3.81683	3.41871
ALOX15B	10.2279	11.8104	2.99488	10.1637	12.1037	3.83724	3.41606
WDR91	7.95626	9.63381	3.19883	7.9606	9.82114	3.63144	3.41513
SSUH2	4.24112	5.83036	3.0089	3.98976	5.92214	3.81683	3.41287
LIG1	8.67966	10.3319	3.14311	8.56961	10.4485	3.67789	3.4105
FAM227A	5.74371	7.78483	4.11566	6.23243	7.66646	2.70199	3.40883
GPM6B	5.39692	6.91764	2.86934	5.49523	7.4742	3.9421	3.40572
TCOF1	10.6247	12.2446	3.07357	10.3108	12.2092	3.72818	3.40088
TJAP1	9.08747	10.826	3.33683	9.19452	10.9828	3.45393	3.39538
EIF4EBP3	4.43456	6.00591	2.97182	4.65962	6.59263	3.81851	3.39516
PAICS	10.6297	12.3702	3.34148	10.5622	12.3464	3.44432	3.3929
ZNF507	7.30872	9.05203	3.348	7.27828	9.05311	3.42199	3.385
PGAP1	5.91604	8.03036	4.32989	6.46615	7.75034	2.43545	3.38267
IFI16	10.3257	11.9664	3.11825	10.1854	12.051	3.64425	3.38125
IGFBP6	10.4347	11.9936	2.94634	10.2514	12.1815	3.81092	3.37863
ALDH1L2	9.17848	10.8723	3.23517	9.21053	11.0212	3.50803	3.3716
TICRR	6.94241	8.8004	3.62501	7.01108	8.64979	3.11387	3.36944
PAPLN	6.87564	8.81844	3.8445	7.33796	8.86864	2.88922	3.36686
COL7A1	10.5857	12.3272	3.34381	10.8256	12.5856	3.38689	3.36535
ZNF488	6.62193	8.3751	3.37098	6.519	8.26442	3.35293	3.36195
SKA3	6.5378	8.30734	3.40945	6.25346	7.98189	3.31368	3.36156
MCC	9.91214	11.5555	3.12391	9.67208	11.5108	3.57694	3.35043
ANP32B	11.073	12.6302	2.94279	10.8916	12.7985	3.74986	3.34632
LETMD1	8.90961	10.5403	3.09655	8.80928	10.65	3.58184	3.33919
LRIG3	7.78562	9.43938	3.14653	7.72799	9.54839	3.53177	3.33915
BUB1	7.66472	9.38508	3.29519	7.26809	9.02536	3.38059	3.33789
FFAR2	4.24112	6.02411	3.44139	3.98976	5.68104	3.22943	3.33541
PLEKHG4	7.22555	8.78737	2.95226	7.12853	9.02256	3.71672	3.33449
TMCO6	6.99367	8.6004	3.04562	7.11721	8.97402	3.62207	3.33385
IL20RB	11.3652	12.9074	2.91233	11.134	13.0426	3.75435	3.33334
CPVL	6.39184	7.83132	2.71221	6.02747	8.01051	3.95325	3.33273
XRCC2	6.16279	8.08678	3.79473	6.33456	7.85507	2.86893	3.33183
CCDC57	8.75553	10.3967	3.11927	8.75573	10.5792	3.5394	3.32933
BLM	6.27154	8.14108	3.65414	6.14502	7.72982	2.99966	3.3269
TBC1D8	9.70964	11.381	3.1851	9.73246	11.5262	3.46721	3.32615
RPS25	5.39692	6.45635	2.08412	5.59963	7.79051	4.56585	3.32499
WDR35	6.94241	8.75829	3.52074	7.07101	8.71031	3.11515	3.31795
NFASC	5.03428	6.8078	3.41887	5.12128	6.80471	3.2119	3.31538
NOB1	9.48519	10.9654	2.79	9.2855	11.2203	3.82329	3.30664
RFXAP	4.59751	6.45635	3.62718	4.96788	6.54613	2.98609	3.30663
CCNA2	7.79285	9.46414	3.185	7.40458	9.18187	3.42781	3.30641
GALNT12	4.24112	5.94983	3.26868	4.23273	5.97044	3.33505	3.30186
MXD4	10.4957	12.1358	3.11683	10.3486	12.1485	3.48185	3.29934
BST2	9.70773	11.4249	3.288	9.59084	11.3167	3.30787	3.29794
MCM2	9.68075	11.1992	2.86489	9.30799	11.2056	3.72583	3.29536
PCLAF	5.58142	7.41578	3.56614	5.56572	7.15272	3.00423	3.28519
CEP55	7.78562	9.41926	3.10295	7.29845	9.09109	3.46449	3.28372
TRAP1	9.41206	10.9184	2.84096	9.17833	11.075	3.72342	3.28219
SPAG5	7.51533	9.39542	3.68099	7.67505	9.20184	2.88145	3.28122
DHRS3	11.4736	13.0363	2.95396	11.2972	13.1452	3.60016	3.27706
FAM13A	6.99367	8.64152	3.13368	6.63516	8.40895	3.41951	3.2766
PHF19	8.19312	9.84965	3.15256	8.01636	9.78188	3.39997	3.27626
ZNF581	8.32852	9.88675	2.94493	8.20943	10.0559	3.59625	3.27059
QTRT1	8.15439	9.67964	2.87837	8.20411	10.0736	3.65415	3.26626
ISM1	5.51064	6.8078	2.45745	5.02113	7.04586	4.06917	3.26331
ARHGAP11B	3.99644	6.09463	4.28171	4.4249	5.5902	2.24281	3.26226
CCDC150	5.54649	6.87867	2.51782	5.02113	7.0235	4.00658	3.2622
NFATC4	6.91608	8.7795	3.63869	7.0943	8.6204	2.88008	3.25939
HJURP	7.31879	8.8261	2.8428	6.65101	8.52451	3.66422	3.25351
DPEP1	4.59751	6.37425	3.42653	4.58682	6.20975	3.07999	3.25326
PRC1	8.7848	10.4897	3.2601	8.63436	10.3265	3.23131	3.2457
MEFV	3.83884	5.60477	3.40094	3.8333	5.45872	3.08532	3.24313
TK1	8.62811	10.1155	2.80382	8.18261	10.0628	3.68115	3.24248
FAM83D	7.82846	9.65404	3.5445	7.80744	9.35906	2.93147	3.23798
CFB	5.3153	7.25811	3.84455	5.665	7.05691	2.62427	3.23441
EGR1	9.88875	12.0192	4.37849	11.3427	12.3993	2.08005	3.22927
ZNF367	6.25046	7.67013	2.67525	5.8719	7.79051	3.78059	3.22792
WDR90	8.89961	10.4905	3.01239	8.80226	10.5783	3.42481	3.2186
E2F1	7.25731	8.65306	2.63126	6.58654	8.51257	3.80007	3.21567
TAF15	3.83884	5.91114	4.20557	4.11978	5.2737	2.22519	3.21538
MCM3	9.93515	11.5051	2.96889	9.74716	11.5371	3.45795	3.21342
AHSA2	8.96179	10.74	3.43006	9.24203	10.8219	2.98948	3.20977
PER2	6.41093	8.12044	3.27048	6.63516	8.2833	3.1343	3.20239
MCM6	9.31261	10.8157	2.83455	8.94307	10.7777	3.5668	3.20067
FAM216A	5.91604	7.66443	3.35985	5.95187	7.55421	3.03637	3.19811
SYT12	8.41532	9.66547	2.37867	8.01636	10.0226	4.01743	3.19805
EIF4EBP1	9.52474	10.9649	2.71345	9.32525	11.2006	3.66891	3.19118
SPAG4	6.06926	7.56396	2.81806	5.92572	7.75711	3.5588	3.18843
PHF21B	3.11789	5.03048	3.76484	3.62633	5.01005	2.60942	3.18713
GLDC	3.6303	5.67645	4.13001	4.4249	5.5902	2.24281	3.18641
ABCA10	5.61546	7.08093	2.76153	5.38201	7.23281	3.607	3.18427
TMEM67	6.25046	7.75298	2.83338	5.97753	7.7971	3.52976	3.18157
PIK3R1	9.5484	11.109	2.94968	9.53472	11.3024	3.40496	3.17732
GSTA4	5.08562	6.8078	3.29935	4.96788	6.5773	3.0513	3.17532
KAT2A	9.13085	10.624	2.81495	8.9684	10.7893	3.533	3.17397
VNN3	4.12738	5.7665	3.11475	3.8333	5.52607	3.23277	3.17376
RAPGEF3	8.90961	10.6378	3.31314	8.93024	10.5287	3.0283	3.17072
CCDC18	6.44836	8.09103	3.12245	6.42979	8.11435	3.21442	3.16843
PFKM	8.83113	10.3725	2.91078	8.80226	10.5773	3.42254	3.16666
ELOVL5	10.5034	12.1632	3.15981	10.506	12.1676	3.16363	3.16172
SLC37A2	10.0571	11.6448	3.00584	9.90468	11.628	3.30189	3.15386
KCNJ5	3.6303	5.1742	2.91581	3.62633	5.38779	3.39042	3.15312
BCL11A	6.20731	7.64142	2.70216	6.14502	7.99341	3.60098	3.15157
MUC4	4.34254	6.16176	3.52891	4.11978	5.5902	2.77104	3.14997
GOLGA8A	8.56202	10.3673	3.49495	9.00864	10.4907	2.79348	3.14421
HSPBAP1	6.65423	8.34695	3.23265	6.75724	8.35644	3.02976	3.13121
PDPN	9.01215	10.5526	2.90893	8.73374	10.4785	3.35134	3.13013
ENOSF1	8.76658	10.3959	3.09364	8.70765	10.3679	3.1608	3.12722
MACROD1	8.35316	9.5313	2.26285	7.93511	9.9284	3.98145	3.12215
FOXA2	5.13495	6.65452	2.86705	5.02113	6.76475	3.34875	3.1079
CSRP2	7.0062	8.78475	3.43082	7.01108	8.48837	2.78425	3.10753
C19orf54	7.04315	8.49215	2.73019	6.78619	8.58281	3.47406	3.10213
NEIL3	5.13495	6.88851	3.37188	4.91223	6.41412	2.83214	3.10201
UST	7.43437	9.01898	2.99926	7.41385	9.09109	3.19814	3.0987
FANCI	8.64815	10.331	3.21051	8.48437	10.0628	2.98639	3.09845
RTN1	3.83884	5.13976	2.46387	3.62633	5.52607	3.73147	3.09767
FBXO32	10.9733	12.5775	3.0402	10.8883	12.5442	3.15103	3.09561
TMEM156	7.33871	9.02786	3.22467	7.57124	9.13849	2.96341	3.09404
FANCD2	8.33348	10.0439	3.27265	8.26162	9.80165	2.908	3.09032
TMEM97	7.92371	9.4723	2.92531	7.72055	9.42214	3.25259	3.08895
HAUS4	7.12582	8.62111	2.81921	7.1509	8.89341	3.34617	3.08269
KSR1	6.79116	8.33626	2.91823	6.63516	8.32945	3.23616	3.0772
ECM2	4.5191	6.07733	2.94492	4.4249	6.10602	3.20678	3.07585
TRIP13	7.91049	9.44768	2.90229	7.7501	9.44954	3.24775	3.07502
TIAF1	5.58142	6.92722	2.54171	5.42083	7.27124	3.60602	3.07386
PKMYT1	7.71887	9.27928	2.94938	7.55458	9.23129	3.19699	3.07319
MTHFD2	9.71915	11.328	3.05011	9.75628	11.3833	3.0887	3.06941
RECQL4	8.51912	9.98926	2.77049	8.24616	9.99715	3.36589	3.06819
SMC4	9.33997	11.1006	3.38835	9.41779	10.8718	2.73978	3.06406
NFIA	8.37257	9.92412	2.93132	8.34138	10.017	3.1946	3.06296
SCPEP1	10.445	11.8219	2.5971	10.2214	12.0383	3.5231	3.0601
ATM	9.29746	10.9781	3.20572	9.35436	10.8958	2.91084	3.05828
NPR3	3.99644	5.7665	3.41067	3.98976	5.42373	2.70189	3.05628
PDK1	7.09097	8.72861	3.11156	7.13976	8.72419	2.99889	3.05523
NCAPD2	10.1358	11.6624	2.88106	9.81155	11.4993	3.22144	3.05125
ELAVL2	6.3128	8.0995	3.45025	6.31472	7.71598	2.64132	3.04578
PYHIN1	5.08562	6.68879	3.03809	5.16855	6.77819	3.05176	3.04493
MMS22L	7.66472	9.28671	3.07798	7.55458	9.14366	3.00859	3.04328
DLG4	7.41574	9.21264	3.47473	7.80744	9.19189	2.61073	3.04273
P2RY1	4.24112	5.42105	2.26565	3.8333	5.7662	3.81821	3.04193
SHCBP1	7.54133	9.04985	2.84517	7.21601	8.90869	3.23256	3.03887
FOXRED2	7.56687	8.9737	2.65153	7.25782	9.03096	3.41796	3.03475
TGFBI	14.5904	16.0998	2.84685	14.4963	16.1808	3.21443	3.03064
GFPT2	6.06926	7.48209	2.6626	6.05179	7.81668	3.3985	3.03055
PLK4	6.68582	8.42643	3.34176	6.84238	8.2833	2.71495	3.02836
ZC3H12C	9.11654	10.8834	3.40309	9.34955	10.7415	2.62433	3.01371
MTSS1	9.78035	11.3935	3.05919	9.89975	11.4666	2.9626	3.01089
UHRF1	8.73694	10.3786	3.1203	8.6618	10.1982	2.90062	3.01046
DHFR	8.1088	9.7117	3.03753	7.87604	9.45163	2.98056	3.00904
ATP8A1	6.20731	7.82622	3.07145	6.16739	7.72292	2.93941	3.00543
SERPINA5	5.18245	6.59551	2.66301	4.79266	6.53029	3.33488	2.99895
TSHZ1	7.75633	9.22042	2.75888	7.52922	9.22399	3.23724	2.99806
RFC3	7.05525	8.77158	3.28599	7.21601	8.65342	2.70835	2.99717
SLC7A5	14.6252	15.9417	2.49046	14.2724	16.0795	3.49931	2.99489
CKS1B	8.56202	9.98926	2.68932	8.36542	10.0871	3.29827	2.9938
RAD51AP1	5.96901	7.81084	3.58465	6.31472	7.57737	2.39937	2.99201
GPHN	7.52405	8.95518	2.69658	7.41385	9.1307	3.28717	2.99187
CDC20	8.84161	10.3435	2.83207	8.36542	10.0198	3.14793	2.99
DUT	8.60778	10.1727	2.95863	8.58608	10.1781	3.0148	2.98671
PTPRZ1	3.6303	5.1742	2.91581	3.62633	5.23335	3.04623	2.98102
S100A3	6.79116	8.3434	2.93271	6.81456	8.41324	3.02867	2.98069
CENPW	6.9293	8.3751	2.72413	6.75724	8.45129	3.23566	2.97989
MMP28	4.43456	5.98746	2.93407	4.4249	6.01712	3.01512	2.9746
GABRP	10.0237	11.9566	3.81812	10.1554	11.2422	2.12395	2.97104
CCDC74A	5.43591	6.64292	2.30858	5.02113	6.88143	3.63083	2.9697
XPOT	10.4138	11.9548	2.91007	10.3546	11.9525	3.02691	2.96849
AC007325.2	4.24112	5.78812	2.92208	4.11978	5.71002	3.011	2.96654
CCL22	3.11789	5.06797	3.86395	3.62633	4.67476	2.06828	2.96611
C14orf93	6.80559	8.12873	2.50209	6.63516	8.41324	3.42969	2.96589
ERCC6L	6.1168	7.75834	3.11997	5.89907	7.38946	2.80963	2.9648
SYN3	3.11789	4.86808	3.36402	3.8333	5.1917	2.56401	2.96401
C3	15.7748	17.2785	2.8358	15.6063	17.2342	3.09061	2.9632
CCNB1IP1	8.89626	10.2383	2.53508	8.61042	10.3668	3.37857	2.95683
FIBIN	5.39692	6.59551	2.29517	4.91223	6.76475	3.6113	2.95323
IFITM1	6.5378	8.23623	3.24547	6.33456	7.73669	2.64292	2.9442
ZNF519	5.18245	6.70003	2.86309	5.0722	6.66689	3.02031	2.9417
RP11-666A8.13	6.52036	8.01702	2.8219	6.55317	8.16613	3.05878	2.94034
BTBD11	7.93028	9.4901	2.94815	7.896	9.44745	2.93111	2.93963
KNL1	6.94241	8.62404	3.20791	6.71268	8.13008	2.67104	2.93948
ANLN	9.6433	11.2115	2.96527	9.33014	10.8726	2.91296	2.93911
NCAPG2	7.99437	9.60143	3.04631	7.87604	9.37674	2.82979	2.93805
RHBDL1	5.51064	7.08948	2.9873	5.72737	7.25215	2.87743	2.93237
ARL4D	8.06172	9.54064	2.7874	8.06417	9.68412	3.07364	2.93052
NR1H3	7.21481	8.70109	2.80166	7.23707	8.84977	3.05825	2.92996
ITGB3BP	7.15984	8.81073	3.14028	7.41385	8.85609	2.71741	2.92884
PALMD	4.43456	5.52909	2.13543	4.33347	6.22961	3.72214	2.92878
DNA2	6.22905	7.90561	3.19665	6.41125	7.82315	2.66088	2.92876
FAH	8.92612	10.2854	2.56552	8.74844	10.4651	3.28678	2.92615
EPAS1	11.6228	12.9646	2.53465	11.2675	12.9971	3.31623	2.92544
ATOH8	4.73957	6.27202	2.89276	4.23273	5.79345	2.95	2.92138
RNASEH2A	7.82846	9.07365	2.3705	7.34767	9.13849	3.46012	2.91531
RXRA	10.8925	12.2675	2.59373	10.6143	12.3087	3.23639	2.91506
NAP1L1	11.8251	13.2937	2.76741	11.8209	13.4329	3.05676	2.91208
ITGAM	4.34254	5.91114	2.96617	4.33347	5.84637	2.85383	2.91
ZFYVE28	4.12738	5.67645	2.92627	4.11978	5.65143	2.89117	2.90872
SH3RF3	8.31854	9.75783	2.71186	8.26674	9.90118	3.10468	2.90827
CAMKK1	6.18522	7.75834	2.97547	6.42979	7.93489	2.83845	2.90696
HMGA1	13.1882	14.773	2.9997	12.9627	14.4517	2.80692	2.90331
PXK	7.77835	9.2009	2.68059	7.65956	9.30239	3.12277	2.90168
SELENBP1	5.61546	7.13972	2.87638	5.84418	7.38946	2.91859	2.89749
HR	6.9293	8.53019	3.03329	7.0943	8.55977	2.76155	2.89742
CHAF1B	7.30872	8.84885	2.9082	7.20536	8.73451	2.88616	2.89718
RP11-298J23.10	6.4667	8.1121	3.12833	6.75724	8.17121	2.6647	2.89652
FBXO4	6.35287	7.78483	2.69812	6.18941	7.81668	3.0893	2.89371
KCTD12	8.66399	10.3083	3.12607	8.75573	10.1642	2.65458	2.89032
DEPDC1B	6.42977	7.90077	2.77214	6.33456	7.92289	3.00702	2.88958
LSP1	4.86618	6.3601	2.81653	4.58682	6.14844	2.95185	2.88419
IL1RL1	3.99644	5.58001	2.9971	4.11978	5.5902	2.77104	2.88407
LIAS	8.67576	10.2015	2.87927	8.75936	10.2873	2.88373	2.8815
MT2A	13.8535	15.1343	2.4298	13.6239	15.3606	3.33268	2.88124
ADAT2	6.57205	8.27409	3.2536	6.99879	8.32033	2.49934	2.87647
KCNAB2	6.84803	8.06102	2.31817	6.60293	8.37855	3.42385	2.87101
ZC3H12A	8.61187	10.4695	3.62406	9.40625	10.4877	2.11609	2.87008
C5AR1	3.99644	5.36355	2.57953	3.8333	5.49282	3.15911	2.86932
ORAI3	6.04487	7.35336	2.47683	6.05179	7.75711	3.26102	2.86893
SPRR2A	6.42977	7.89592	2.76284	6.12229	7.69496	2.97456	2.8687
CENPA	5.88877	7.59425	3.26138	6.02747	7.32701	2.4615	2.86144
JAG1	10.0809	11.666	3.00034	10.2604	11.7043	2.72063	2.86048
PPIL6	3.83884	5.33384	2.81864	4.23273	5.7662	2.8948	2.85672
ATP6AP1L	5.94278	7.52676	2.99796	6.23243	7.67364	2.71547	2.85672
POU2F2	5.68109	7.33193	3.14017	5.8159	7.17316	2.56199	2.85108
HDHD5	8.36774	9.73766	2.58456	8.19877	9.83879	3.1167	2.85063
SGO1	5.4738	7.05498	2.99215	5.49523	6.93037	2.70408	2.84811
FBXO5	6.37249	7.91523	2.91346	6.09918	7.56969	2.7712	2.84233
DEK	10.3232	11.8737	2.92913	10.3206	11.7826	2.75495	2.84204
KLRC1	3.83884	4.99184	2.22376	3.8333	5.62116	3.45303	2.8384
KIF20B	8.02538	9.61034	2.99999	8.01027	9.43062	2.67651	2.83825
GHR	4.98075	6.40215	2.67846	5.0722	6.65235	2.99001	2.83423
CALML6	3.99644	5.62909	3.1008	4.58682	5.9465	2.56628	2.83354
NOTCH1	11.2907	12.759	2.76704	11.3003	12.8361	2.89952	2.83328
CCNB1	9.4695	10.9457	2.78206	9.15094	10.6761	2.87817	2.83012
TUBE1	7.03094	8.54265	2.85148	7.11721	8.60548	2.80554	2.82851
P3H2	10.8967	12.1104	2.31933	10.6771	12.4149	3.33525	2.82729
DBF4B	7.04315	8.58241	2.90647	6.97388	8.43028	2.74422	2.82534
PCK2	8.98088	10.4044	2.68246	8.9809	10.5484	2.96385	2.82315
ZNF337	5.83256	7.436	3.03866	5.89907	7.28068	2.60559	2.82212
GOLGA6L9	4.34254	5.7665	2.68321	4.33347	5.89734	2.95646	2.81983
ORC6	6.94241	8.476	2.89505	6.93569	8.39166	2.74341	2.81923
CDK4	8.84856	10.0559	2.30918	8.47113	10.2031	3.32185	2.81552
HCLS1	5.08562	6.65452	2.96679	5.02113	6.43131	2.65772	2.81225
GIMAP2	3.6303	5.20774	2.98439	3.8333	5.23335	2.63911	2.81175
SLC27A5	6.16279	7.55167	2.61876	6.14502	7.72982	2.99966	2.80921
CHAF1A	8.61594	10.0073	2.62333	8.43977	10.0212	2.99272	2.80803
ZNF219	9.91048	11.2994	2.61883	9.74533	11.3287	2.9967	2.80776
MST1	6.04487	7.51414	2.76882	6.29459	7.80366	2.84625	2.80754
CELSR2	10.1372	11.5102	2.59009	9.97665	11.5735	3.02473	2.80741
CDCA2	6.8619	8.45966	3.02673	6.78619	8.15592	2.58423	2.80548
KIF21B	5.43591	6.99252	2.94162	5.72737	7.14238	2.66662	2.80412
GTSE1	7.14859	8.67586	2.8824	6.89644	8.343	2.72558	2.80399
EVA1C	7.7036	8.89573	2.28489	7.43222	9.16162	3.3159	2.8004
CES3	4.24112	6.00591	3.39824	5.16855	6.30634	2.20043	2.79934
LTBP4	8.95537	10.2789	2.50272	8.99638	10.6262	3.09468	2.7987
ACADM	7.83547	9.23392	2.63618	7.75739	9.32305	2.96012	2.79815
ZC3HAV1	10.6928	12.2787	3.00196	10.9356	12.3092	2.59118	2.79657
HSPA12A	6.6055	8.05668	2.73432	6.48399	7.99913	2.85827	2.7963
TAF4B	7.14859	8.41969	2.41346	6.78619	8.45129	3.17138	2.79242
MCM8	7.13725	8.85885	3.29801	7.59587	8.78504	2.28022	2.78912
TPX2	9.63127	10.9986	2.57992	9.20787	10.7876	2.98923	2.78457
ICAM5	7.52405	8.88599	2.57031	7.48594	9.06951	2.99711	2.78371
SPATA6	4.59751	6.16176	2.95725	4.58682	5.97044	2.60922	2.78323
LCE1C	4.24112	5.30343	2.08828	3.62633	5.42373	3.47594	2.78211
LDHB	12.0037	13.3507	2.54375	11.8135	13.4081	3.0202	2.78197
KLRC3	3.6303	4.62824	1.99715	3.62633	5.45872	3.56128	2.77921
PPARGC1A	3.11789	4.77794	3.16027	4.23273	5.49282	2.3951	2.77768
GINS4	6.81988	8.09527	2.42064	6.46615	8.11435	3.13441	2.77753
NCKAP5	6.35287	7.50141	2.21688	5.97753	7.71598	3.33677	2.77682
LRPPRC	10.9133	12.3813	2.76632	10.8867	12.3612	2.77897	2.77264
RTN4RL2	3.99644	5.52909	2.89316	4.11978	5.52607	2.65055	2.77186
RPS2	13.8643	15.042	2.26218	13.5974	15.3114	3.28078	2.77148
WNT6	5.08562	6.4159	2.51452	4.72804	6.32488	3.0248	2.76966
HAUS3	6.67012	8.18149	2.85081	6.66668	8.0931	2.6878	2.7693
MAP3K7CL	5.80358	7.27318	2.76946	5.63271	7.10028	2.76557	2.76752
COQ8A	8.02538	9.39026	2.57555	7.94791	9.51286	2.95866	2.76711
ZC3H8	6.9293	8.44977	2.86885	7.23707	8.64615	2.65568	2.76227
KIZ	6.87564	8.21302	2.52692	6.72768	8.31117	2.99692	2.76192
NRP2	9.5007	10.9468	2.72476	9.27792	10.761	2.7954	2.76008
SBSN	4.43456	5.87134	2.70715	4.85393	6.34319	2.80745	2.7573
FAM72B	4.5191	6.16176	3.1224	4.4249	5.68104	2.38856	2.75548
CLMP	10.8866	12.1775	2.4469	10.7261	12.3389	3.05825	2.75258
RFX2	7.32878	8.58543	2.38939	7.05922	8.6963	3.11034	2.74987
FNDC1	4.12738	5.67645	2.92627	3.98976	5.35085	2.56879	2.74753
CNTNAP1	6.62193	8.01255	2.62191	6.46615	7.98766	2.87092	2.74642
DSCC1	6.22905	7.33193	2.14784	5.665	7.40681	3.34455	2.7462
STOM	10.9509	12.284	2.51951	10.8038	12.3712	2.96362	2.74156
CFAP69	4.5191	6.21008	3.22874	5.02113	6.18961	2.24775	2.73825
SASS6	6.18522	7.61212	2.68868	6.18941	7.66646	2.78379	2.73623
ALDH1L1	4.43456	5.69952	2.40321	4.23273	5.84637	3.06023	2.73172
TMTC1	8.54501	9.89649	2.55174	8.23576	9.77523	2.90688	2.72931
CCNB2	8.08546	9.41926	2.52066	7.84215	9.39637	2.93675	2.7287
TIMM9	7.86321	9.2511	2.61696	8.09902	9.60385	2.83791	2.72743
ZNF692	8.24145	9.67399	2.69922	8.42612	9.8812	2.74171	2.72047
SLC47A2	4.73957	5.98746	2.37495	4.4249	6.03988	3.06308	2.71901
SDPR	8.90295	10.2611	2.56353	8.84391	10.3668	2.87372	2.71862
PACRGL	5.80358	7.22749	2.68311	5.59963	7.05691	2.74591	2.71451
CDCA3	6.37249	7.97164	3.02965	6.5016	7.76385	2.3987	2.71417
RPL12	13.1887	14.3423	2.22469	12.997	14.6753	3.20063	2.71266
BDKRB1	4.24112	5.55479	2.48573	4.50891	6.06228	2.93502	2.71038
NPM1	13.8018	15.0709	2.41002	13.6236	15.2136	3.01053	2.71027
GSG2	6.20731	7.88127	3.19089	6.44809	7.60017	2.22234	2.70662
POLE	9.8701	11.2041	2.52107	9.68932	11.2185	2.88617	2.70362
GEN1	7.50655	9.16711	3.16139	7.76465	8.9298	2.24256	2.70197
SPIN4	7.30872	8.69831	2.62003	7.18382	8.65704	2.77641	2.69822
PTPN22	3.99644	5.42105	2.68441	4.11978	5.55852	2.71084	2.69763
RPL10A	12.6753	13.8908	2.32219	12.5002	14.1185	3.07007	2.69613
PFKFB3	8.98088	10.3265	2.54132	8.93346	10.4422	2.84564	2.69348
RBL1	7.26774	8.57029	2.46665	7.20536	8.74816	2.9136	2.69012
PROCR	8.15439	9.42599	2.4143	8.02243	9.58876	2.96151	2.68791
PLLP	5.86095	7.21973	2.56467	5.95187	7.4409	2.807	2.68584
GPR63	4.59751	5.60477	2.0101	3.98976	5.7384	3.36041	2.68525
LRP1	10.6043	11.8731	2.40958	10.4007	11.9653	2.95797	2.68377
ZNF665	4.12738	5.24042	2.16301	3.11789	4.79727	3.2029	2.68296
CTC-518B2.8	4.86618	6.33134	2.76095	4.65962	6.03988	2.60315	2.68205
APBB3	6.94241	8.39241	2.73209	7.21601	8.60548	2.61984	2.67596
NLE1	8.2572	9.51559	2.39229	8.12179	9.68412	2.95331	2.6728
LRRC8C	6.91608	8.51446	3.02804	7.0943	8.30656	2.31701	2.67252
CCDC34	7.06726	8.51762	2.73276	7.19463	8.57517	2.60366	2.66821
ANKMY1	6.76185	8.22467	2.75647	6.81456	8.18131	2.57889	2.66768
PCNA	10.253	11.6038	2.55063	10.1485	11.6247	2.78221	2.66642
CLNS1A	10.3467	11.6815	2.5225	10.4088	11.8958	2.80294	2.66272
TIMELESS	8.65213	9.94889	2.45677	8.32675	9.84515	2.86472	2.66075
GGT5	4.12738	5.52909	2.64214	4.4249	5.84637	2.67859	2.66036
CNTRL	6.96827	8.50175	2.89484	7.34767	8.62411	2.42241	2.65863
SULT1B1	4.80456	5.91114	2.15334	4.50891	6.16918	3.16076	2.65705
ANK2	4.5191	5.65297	2.19446	4.50891	6.14844	3.11565	2.65506
GOLGA8B	7.8214	9.44602	3.08361	8.52762	9.67343	2.21271	2.64816
NUP62CL	4.80456	6.34579	2.91043	5.21414	6.46508	2.37997	2.6452
SGPP2	9.83906	11.1011	2.39832	9.69881	11.2307	2.8916	2.64496
STMN3	6.4667	7.70939	2.36639	6.519	8.06609	2.92227	2.64433
CDCA8	7.63284	8.84383	2.31496	7.17293	8.74476	2.97281	2.64388
SSRP1	11.6583	12.9501	2.44825	11.4882	12.9899	2.83179	2.64002
APOBEC3G	5.64867	6.98338	2.52223	5.34201	6.80471	2.75624	2.63923
PFAS	8.08546	9.46904	2.60917	8.00416	9.42001	2.66817	2.63867
SAMSN1	4.80456	6.22582	2.67819	4.79266	6.16918	2.59641	2.6373
BIK	7.34857	8.77158	2.68145	7.55458	8.9268	2.58869	2.63507
SERPINB13	6.02004	7.39527	2.59411	6.00272	7.41541	2.66232	2.62821
NAA16	7.05525	8.62111	2.96053	7.38586	8.58281	2.29254	2.62654
CCDC88C	8.4659	9.77508	2.47802	8.4533	9.9239	2.77138	2.6247
ARAP3	10.3119	11.6581	2.54239	10.2795	11.7126	2.70032	2.62136
PSPH	7.54989	8.88109	2.51611	7.57949	9.02536	2.72427	2.62019
POLE2	5.94278	7.30286	2.567	5.84418	7.26172	2.6713	2.61915
DDIAS	6.42977	7.91523	2.80006	6.37343	7.65924	2.4382	2.61913
PPP1R3E	6.20731	7.2881	2.1152	5.8719	7.51476	3.12284	2.61902
DBF4	6.71672	8.38205	3.17186	6.94853	7.99341	2.06319	2.61752
GPSM2	8.9966	10.2863	2.44476	8.9933	10.4713	2.78562	2.61519
RAD52	7.03094	8.51762	2.80244	7.36689	8.6425	2.42101	2.61172
ESR1	6.35287	7.83132	2.78648	6.09918	7.3807	2.43095	2.60871
SMC1B	4.12738	5.50288	2.59458	4.23273	5.62116	2.61794	2.60626
LMO2	7.22555	8.36461	2.20237	6.85609	8.44292	3.0039	2.60314
PBK	6.91608	8.39241	2.78241	6.90964	8.18633	2.42282	2.60262
FANCG	7.84246	9.17113	2.51171	7.77906	9.20679	2.69025	2.60098
SYT7	7.57528	8.75294	2.26209	7.33796	8.89341	2.93926	2.60068
KIAA0922	7.75633	9.23967	2.79594	7.84215	9.10441	2.39872	2.59733
DCST2	4.5191	5.87134	2.55307	4.4249	5.82016	2.63037	2.59172
CENPE	8.18216	9.71858	2.90073	8.19877	9.38768	2.27981	2.59027
PAK6	7.13725	8.28896	2.22177	6.93569	8.50052	2.95843	2.5901
POLR1D	10.2199	11.422	2.30076	10.1881	11.7117	2.87511	2.58793
RMI2	6.74697	8.09103	2.53866	6.74254	8.14047	2.63524	2.58695
LIX1L	6.80559	8.39585	3.01103	7.12853	8.24047	2.16137	2.5862
KCNMA1	5.35674	6.64292	2.43881	5.30076	6.75117	2.73286	2.58583
VSNL1	5.77397	7.20408	2.69467	5.8159	7.12149	2.47185	2.58326
ARHGAP22	6.4667	7.81599	2.54786	6.41125	7.7971	2.61326	2.58056
CYP4F2	3.83884	5.03048	2.28413	3.62633	5.14866	2.87256	2.57834
SCML2	4.24112	5.69952	2.74804	4.11978	5.38779	2.4083	2.57817
BAG2	6.81988	8.31462	2.81813	6.93569	8.16103	2.33812	2.57813
TSPOAP1	3.83884	5.33384	2.81864	3.8333	5.05797	2.33701	2.57783
LONP1	10.5961	11.8359	2.36176	10.4065	11.8854	2.78732	2.57454
IRAK2	9.44909	10.7754	2.50762	9.44511	10.8427	2.63468	2.57115
TACC3	8.14877	9.51559	2.57902	7.95427	9.31161	2.56211	2.57057
RPL3	14.4769	15.6007	2.17931	14.258	15.8229	2.95872	2.56901
HS6ST2	8.20941	9.58948	2.6028	8.20411	9.54252	2.52873	2.56577
KIAA1524	7.07916	8.40612	2.50872	6.96126	8.35197	2.62208	2.5654
RNF152	8.02538	9.38681	2.5694	8.07004	9.42214	2.55283	2.56112
ANKRD13B	8.53643	9.77376	2.35762	8.42612	9.89046	2.75936	2.55849
MSTN	3.83884	5.27231	2.70096	3.8333	5.10412	2.41299	2.55698
HNRNPA1L2	7.2468	8.53643	2.44465	7.42307	8.83706	2.66473	2.55469
PTK2B	10.8113	12.1017	2.44603	10.7976	12.2095	2.66085	2.55344
SMC6	9.10788	10.4357	2.51015	9.17017	10.5406	2.5854	2.54778
THG1L	8.71049	9.8077	2.1394	8.47113	10.0324	2.95118	2.54529
IL4I1	3.83884	5.1742	2.52339	3.8333	5.1917	2.56401	2.5437
RAD51	6.71672	8.2052	2.80593	6.97388	8.16103	2.27703	2.54148
DYRK3	6.20731	7.60619	2.63697	6.02747	7.31786	2.44595	2.54146
ZP3	5.83256	7.03741	2.30513	5.8719	7.34513	2.77643	2.54078
PCCA	7.78562	9.02786	2.36566	7.88938	9.32987	2.71413	2.5399
PARPBP	6.06926	7.50141	2.69848	6.07569	7.32701	2.3806	2.53954
AMER1	6.13998	7.52676	2.61493	6.25346	7.55421	2.46358	2.53925
EXOSC5	7.64088	8.63863	1.99688	7.43222	9.05586	3.08152	2.5392
CCNA1	4.59751	5.72221	2.18057	4.23273	5.7662	2.8948	2.53769
HCAR2	5.91604	7.26567	2.54847	6.31472	7.65199	2.52672	2.5376
BCL11B	5.88877	7.15608	2.40713	5.69654	7.11093	2.66546	2.5363
C14orf159	8.85547	10.0439	2.27911	8.80578	10.2861	2.79017	2.53464
ST3GAL2	7.05525	8.32548	2.41199	6.82854	8.23563	2.65203	2.53201
CEP128	6.1168	7.48856	2.58785	6.25346	7.55421	2.46358	2.52572
NEMP1	8.0376	9.41926	2.60568	7.92219	9.21173	2.44449	2.52509
TWIST1	7.01862	8.21692	2.29468	7.0827	8.54421	2.75396	2.52432
ACSL5	6.70136	8.03036	2.5123	6.71268	8.05515	2.53585	2.52408
DLEU1	4.73957	6.19416	2.74078	5.12128	6.32488	2.30313	2.52195
PSIP1	8.42465	9.80899	2.61053	8.34138	9.62249	2.43026	2.52039
SCGB1A1	3.83884	5.10437	2.40416	3.98976	5.38779	2.63541	2.51979
TBC1D31	6.67012	7.93428	2.40188	6.41125	7.81019	2.63707	2.51948
GIGYF1	9.6788	11.1116	2.69964	9.97509	11.1994	2.33638	2.51801
EEF1A1	16.1875	17.3166	2.18734	15.9765	17.486	2.84704	2.51719
NEMP2	7.84941	9.15499	2.47184	7.76465	9.12024	2.55902	2.51543
RPS3	14.3695	15.4496	2.11428	14.1672	15.7072	2.90782	2.51105
CTSV	9.04275	10.5184	2.78102	8.9075	10.0628	2.22725	2.50414
ADCY3	9.09625	10.2918	2.29037	8.93024	10.369	2.71096	2.50067
AOC1	4.80456	5.8094	2.00672	4.58682	6.16918	2.99458	2.50065
TMEM100	3.6303	4.77794	2.21551	3.62633	5.10412	2.78523	2.50037
STARD9	6.25046	7.57616	2.50654	6.18941	7.50674	2.49205	2.4993
C5orf34	5.22826	6.58341	2.55824	5.21414	6.49806	2.435	2.49662
CNTLN	6.35287	7.7476	2.62939	6.56995	7.81019	2.36237	2.49588
NMNAT3	3.83884	5.36355	2.87729	4.23273	5.31284	2.1142	2.49575
EZH2	7.85632	9.29593	2.71247	7.9606	9.14882	2.27871	2.49559
MAP3K12	7.95626	9.10127	2.21148	7.92219	9.39637	2.77826	2.49487
PALM	5.58142	6.63121	2.07023	5.42083	6.96601	2.9184	2.49432
RAD9A	8.33348	9.49331	2.2343	8.21474	9.67522	2.752	2.49315
KIF24	6.57205	7.8515	2.42747	6.14502	7.49867	2.55558	2.49153
EIF4B	12.4684	13.6502	2.2686	12.2988	13.7387	2.71319	2.4909
ZFAND1	8.36774	9.70756	2.53119	8.49748	9.79015	2.44981	2.4905
TWIST2	7.04315	8.24388	2.29856	7.11721	8.54029	2.68158	2.49007
ENGASE	8.47041	9.69785	2.34151	8.31198	9.7105	2.6363	2.48891
RPL29	13.0055	14.0599	2.07681	12.7915	14.3274	2.89957	2.48819
CDC6	8.26241	9.56527	2.46717	8.13863	9.46408	2.50611	2.48664
PLA2G6	7.45276	8.78213	2.51293	7.55458	8.85293	2.45949	2.48621
MED24	10.4823	11.678	2.29052	10.4919	11.9152	2.68186	2.48619
TAF1D	10.4912	11.9805	2.80746	10.8531	11.9653	2.16179	2.48463
EML6	5.27251	6.53395	2.39735	5.16855	6.53029	2.56995	2.48365
EIF2S3	12.0523	13.3133	2.39675	12.069	13.4303	2.56918	2.48297
ZRANB3	5.88877	7.13972	2.37998	6.02747	7.39816	2.58594	2.48296
PHKA2	8.39648	9.75114	2.55737	8.58198	9.84832	2.40551	2.48144
SERPINA1	8.88279	10.1008	2.32632	8.75573	10.154	2.63585	2.48108
AHI1	7.43437	8.75026	2.48955	7.31834	8.62411	2.47216	2.48086
CKAP2	8.59131	9.9972	2.64982	8.51907	9.72782	2.31136	2.48059
BCAM	9.18124	10.3864	2.30566	9.05962	10.4661	2.65099	2.47832
SUSD3	5.74371	6.99252	2.37647	5.59963	6.96601	2.57823	2.47735
ATP8B2	6.79116	8.12873	2.52725	6.74254	8.0218	2.42715	2.4772
KNDC1	3.83884	5.36355	2.87729	4.79266	5.84637	2.07587	2.47658
CGREF1	7.13725	8.29265	2.22746	7.0827	8.52847	2.72409	2.47578
NKPD1	3.83884	5.20774	2.58273	3.98976	5.23335	2.36787	2.4753
ATF7IP2	6.06926	7.55167	2.79415	6.48399	7.59261	2.15639	2.47527
POLD3	8.54073	9.74037	2.29682	8.33652	9.74323	2.65132	2.47407
SLC3A2	12.7465	13.8387	2.13191	12.5075	13.9998	2.81338	2.47265
CENPM	6.06926	7.2881	2.32759	5.53094	6.91829	2.61598	2.47179
NFAM1	3.83884	5.03048	2.28413	4.11978	5.52607	2.65055	2.46734
NEK9	9.969	11.2409	2.41479	9.95939	11.2867	2.5093	2.46204
NCF1	3.83884	5.03048	2.28413	3.8333	5.23335	2.63911	2.46162
SLC1A3	10.2725	11.5605	2.4419	10.122	11.4311	2.47796	2.45993
CCDC88B	6.9554	8.23238	2.42332	6.99879	8.31576	2.49142	2.45737
MASTL	7.41574	8.903	2.80355	7.54617	8.6204	2.1056	2.45457
EIF3E	12.5034	13.6754	2.25317	12.3982	13.8064	2.65414	2.45365
NCAPD3	9.21387	10.5136	2.46188	9.12302	10.4125	2.44446	2.45317
P2RX6	3.83884	5.03048	2.28413	4.23273	5.62116	2.61794	2.45103
SLC5A3	7.48884	8.93878	2.73196	7.57949	8.6963	2.16866	2.45031
NUP160	9.90549	11.1859	2.42906	9.81504	11.1183	2.46783	2.44845
POC1A	7.25731	8.45308	2.29067	7.0943	8.47201	2.59856	2.44462
SYNE3	5.61546	6.66604	2.07135	5.56572	7.05691	2.81121	2.44128
HAUS8	6.16279	7.52676	2.57393	6.44809	7.65199	2.30362	2.43877
RAD51C	7.90383	9.15296	2.37699	7.8004	9.12024	2.49639	2.43669
MAOB	4.24112	5.27231	2.04371	4.4249	5.92214	2.82302	2.43337
ANK1	6.39184	7.42929	2.05259	5.92572	7.41541	2.80828	2.43043
TCF19	4.86618	6.24139	2.59406	4.96788	6.14844	2.26665	2.43035
WDR19	9.18946	10.4348	2.37077	9.22636	10.5415	2.48832	2.42954
AGTPBP1	7.75633	8.81587	2.08427	7.50341	8.97402	2.7714	2.42783
RPS3A	12.8668	13.9092	2.0596	12.6851	14.1682	2.79549	2.42754
HSD11B2	5.39692	6.42951	2.0457	5.0722	6.5618	2.80812	2.42691
NRIP1	10.1344	11.4907	2.56027	10.006	11.2018	2.2908	2.42553
ZNF395	9.16185	10.2573	2.13681	8.91729	10.3569	2.71238	2.4246
TAZ	8.583	9.73631	2.22423	8.56961	9.95953	2.62062	2.42243
OPLAH	8.78842	9.88919	2.1447	8.73374	10.1655	2.69773	2.42122
NKD1	4.43456	5.78812	2.55541	4.33347	5.52607	2.28564	2.42052
SPATA6L	5.61546	6.94618	2.51528	5.8719	7.08956	2.3257	2.42049
ARHGEF4	8.70284	9.86832	2.24307	8.73004	10.1071	2.59742	2.42025
ANKZF1	9.06081	10.407	2.54239	9.25495	10.4537	2.29542	2.41891
FBF1	5.96901	7.28066	2.48225	6.14502	7.3807	2.35492	2.41859
MTFR2	5.51064	6.95557	2.7225	5.97753	7.05691	2.11313	2.41782
TTC39B	7.7036	8.99198	2.44253	7.90916	9.16671	2.3909	2.41671
MBLAC2	6.25046	7.33911	2.12676	5.84418	7.28068	2.70663	2.41669
LBHD1	6.13998	7.50779	2.58077	6.21108	7.3807	2.24952	2.41514
B4GAT1	8.06769	9.18907	2.17554	7.88938	9.29775	2.65438	2.41496
BZW2	9.82152	10.9741	2.22311	9.61509	10.9943	2.60117	2.41214
RASGRF1	4.43456	5.74454	2.47937	4.50891	5.7384	2.34485	2.41211
IARS	11.6188	12.7985	2.26536	11.5072	12.8593	2.55277	2.40906
FKBP10	9.94976	11.0393	2.128	9.79395	11.2215	2.68996	2.40898
SLC2A9	7.43437	8.65306	2.32736	7.19463	8.50856	2.48618	2.40677
NPL	5.22826	6.45635	2.34257	5.25817	6.5618	2.4685	2.40553
PRX	6.25046	7.45594	2.30614	6.46615	7.79051	2.50422	2.40518
BAIAP2L2	7.87006	9.14686	2.42301	7.94152	9.19439	2.38314	2.40308
DISP3	4.9248	6.11172	2.27665	4.96788	6.30634	2.52881	2.40273
RBBP8	9.83906	11.1152	2.42194	9.70447	10.9558	2.38064	2.40129
TCTN1	7.84246	9.17913	2.52568	8.04047	9.22643	2.27515	2.40041
HMGA2	9.17572	10.6327	2.74537	9.48514	10.5238	2.05432	2.39984
PTGFR	3.99644	5.42105	2.68441	4.23273	5.31284	2.1142	2.3993
RTTN	8.63616	9.79604	2.23439	8.54877	9.90423	2.55879	2.39659
SLC7A11	8.77754	9.8977	2.17372	8.4533	9.83879	2.61261	2.39316
GPT2	9.5569	10.7407	2.27174	9.46081	10.7901	2.51283	2.39229
ASB13	7.75633	8.77686	2.02866	7.34767	8.80803	2.75177	2.39022
MBNL3	7.64088	8.85136	2.31415	7.47712	8.77841	2.46448	2.38931
FHIT	6.1168	7.44932	2.51842	6.519	7.69496	2.25943	2.38892
KLRC2	3.83884	5.10437	2.40416	3.98976	5.23335	2.36787	2.38602
RAPGEF5	6.39184	7.80049	2.65488	6.48399	7.56197	2.11109	2.38298
COL4A6	10.6557	11.7975	2.20656	10.5601	11.9152	2.55801	2.38229
SCN2A	4.5191	5.65297	2.19446	3.98976	5.35085	2.56879	2.38163
PKN3	7.14859	8.2208	2.10265	6.96126	8.36532	2.64645	2.37455
DPH5	7.91712	8.93642	2.02694	7.72799	9.17178	2.72034	2.37364
CCHCR1	4.98075	6.25679	2.42172	5.21414	6.43131	2.32491	2.37332
MED30	6.8619	8.22467	2.57178	7.07101	8.19134	2.17397	2.37287
FSCN1	12.3098	13.3117	2.00271	12.0576	13.5121	2.74073	2.37172
RPL34	12.1796	13.207	2.03837	12.0424	13.4777	2.70451	2.37144
GRB14	5.39692	6.45635	2.08412	5.45855	6.86892	2.65806	2.37109
MELK	8.96499	10.2554	2.44601	8.9933	10.1919	2.29522	2.37062
EFNB1	11.3779	12.5388	2.23597	11.2476	12.5684	2.49802	2.36699
RACK1	14.5431	15.5454	2.00322	14.3428	15.7813	2.71041	2.35681
C4orf32	6.90272	8.33267	2.69437	7.11721	8.13008	2.01792	2.35615
SPATC1	3.83884	4.91074	2.1022	3.62633	5.01005	2.60942	2.35581
HCFC1R1	7.94981	9.20483	2.3867	8.17719	9.39203	2.32116	2.35393
ARL4A	7.58365	8.76096	2.26154	7.5877	8.87798	2.44575	2.35365
ALKBH2	7.33871	8.45638	2.16995	7.20536	8.54812	2.53636	2.35316
RGS17	4.9248	6.07733	2.22303	4.65962	5.97044	2.48082	2.35193
SYNPO	10.7072	11.7623	2.07787	10.4042	11.7958	2.6238	2.35083
TSEN2	7.18208	8.31825	2.19796	7.16196	8.4843	2.5007	2.34933
MCM4	10.2789	11.4851	2.3072	10.1705	11.4279	2.39071	2.34895
SLC25A5	11.4163	12.5397	2.17859	11.339	12.6718	2.51883	2.34871
BRIP1	7.1143	8.32908	2.32106	6.90964	8.15592	2.37228	2.34667
DKC1	9.94329	11.0513	2.15548	9.81504	11.1578	2.53635	2.34591
RBMX	11.0686	12.2023	2.19421	10.9097	12.2294	2.49613	2.34517
YEATS4	7.18208	8.45966	2.42433	7.2884	8.46789	2.26497	2.34465
RMI1	6.76185	8.12459	2.57173	6.97388	8.05515	2.11589	2.34381
TGFBR3	6.35287	7.71491	2.57048	6.519	7.60017	2.11574	2.34311
CXCL17	4.67075	5.83036	2.23397	4.23273	5.52607	2.45095	2.34246
MATR3	5.35674	6.58341	2.34027	5.16855	6.39672	2.3427	2.34148
GALNT15	4.5191	5.65297	2.19446	4.4249	5.7384	2.48544	2.33995
PRSS12	9.01524	10.0987	2.11916	8.84391	10.1994	2.55883	2.339
WNT10A	7.79285	8.99425	2.29963	7.62807	8.87798	2.37827	2.33895
ETFB	8.80279	9.86956	2.09473	8.60235	9.97121	2.58266	2.33869
KREMEN1	8.90295	10.0472	2.21034	8.78454	10.0858	2.46442	2.33738
PRICKLE3	8.24145	9.41926	2.26233	8.20943	9.47848	2.41002	2.33618
HSF4	6.63817	7.92478	2.43954	6.89644	8.05515	2.23257	2.33606
DHODH	6.62193	7.77429	2.22277	6.46615	7.75711	2.44691	2.33484
CEP152	6.70136	8.09103	2.6202	6.94853	7.9761	2.03859	2.32939
PI4K2B	8.506	9.86832	2.57099	8.75936	9.81953	2.08517	2.32808
AZIN2	6.13998	7.22749	2.12506	5.84418	7.18328	2.52992	2.32749
PLXND1	6.20731	7.24288	2.04993	5.8719	7.25215	2.60313	2.32653
N4BP2L1	5.3153	6.60751	2.44904	5.34201	6.48167	2.20328	2.32616
PCOLCE	5.27251	6.64292	2.58544	5.75752	6.80471	2.0665	2.32597
FAM161A	5.3153	6.59551	2.42875	5.59963	6.75117	2.22152	2.32514
RPS18	6.04487	7.04622	2.00188	6.02747	7.43245	2.64814	2.32501
DDX11	8.77024	10.0085	2.35908	8.78454	9.97991	2.29003	2.32456
BIRC3	12.3929	13.689	2.45569	12.4835	13.6078	2.17995	2.31782
SERPINF1	5.39692	6.64292	2.37183	5.53094	6.70966	2.26376	2.31779
DDX39A	9.26927	10.4977	2.34317	9.38525	10.5821	2.29238	2.31777
PSMG1	8.22017	9.37467	2.22607	8.23576	9.50283	2.40672	2.3164
ACAT1	9.38843	10.5854	2.29251	9.42008	10.6463	2.3396	2.31605
RPS6	13.7369	14.7702	2.04669	13.5678	14.9365	2.58243	2.31456
PCNT	9.66903	10.8151	2.21309	9.58676	10.8585	2.41461	2.31385
DNMT1	10.3344	11.4245	2.12895	10.1078	11.4285	2.49784	2.3134
ZWINT	8.27794	9.49971	2.33233	8.27691	9.47438	2.29336	2.31285
MTHFD1	10.3997	11.4786	2.11247	10.1814	11.5108	2.51305	2.31276
MAP2K6	3.6303	4.82386	2.28716	3.8333	5.05797	2.33701	2.31209
ZNF496	9.1422	10.2219	2.11364	9.0655	10.3931	2.5099	2.31177
APEX1	10.5467	11.5953	2.06841	10.4476	11.7995	2.55254	2.31048
KIF22	8.59544	9.76316	2.24656	8.51907	9.76352	2.36929	2.30792
EXOSC2	8.2882	9.51401	2.33887	8.30205	9.48868	2.2762	2.30753
SLC29A1	8.51038	9.71583	2.30609	8.36542	9.57159	2.30725	2.30667
LYPD5	4.67075	5.87134	2.29834	5.16855	6.3791	2.31426	2.3063
PDE2A	4.34254	5.36355	2.02934	4.4249	5.79345	2.58211	2.30572
PTPRN2	5.18245	6.31674	2.1951	5.25817	6.53029	2.41516	2.30513
CENPU	7.60023	8.78475	2.27287	7.53772	8.76168	2.33587	2.30437
FAM64A	5.80358	7.01963	2.32309	5.59963	6.79151	2.28451	2.3038
SAP30	6.71672	8.06102	2.53906	7.03536	8.08236	2.06623	2.30265
DEF6	8.35316	9.49971	2.21384	8.41234	9.66985	2.39084	2.30234
NMB	8.24672	9.60143	2.55747	8.02243	9.05586	2.04689	2.30218
MFSD13A	5.35674	6.61941	2.3994	5.665	6.80471	2.20337	2.30139
NUDT6	5.4738	6.67746	2.30323	5.49523	6.69554	2.29789	2.30056
POLD2	10.2412	11.2442	2.00428	9.93068	11.307	2.59601	2.30015
CEP57	9.28215	10.5372	2.38669	9.43833	10.583	2.21103	2.29886
TMPO	9.25104	10.527	2.42162	9.2652	10.3866	2.17557	2.29859
ARL6IP6	7.46186	8.69552	2.35162	7.48594	8.64979	2.24055	2.29608
FLYWCH1	9.6943	10.8481	2.22494	9.73799	10.9791	2.36388	2.29441
ZCCHC11	9.5925	10.8087	2.32327	9.65268	10.8308	2.26275	2.29301
FUS	11.5427	12.7567	2.31983	11.5952	12.7733	2.26277	2.2913
KIF23	8.62001	9.87203	2.38174	8.36064	9.49678	2.19792	2.28983
EEF1D	5.03428	6.28708	2.38304	4.4249	5.55852	2.19409	2.28856
PNMAL1	7.29859	8.6004	2.46539	7.38586	8.45962	2.1049	2.28515
CDKN3	6.88925	8.03036	2.20552	6.65101	7.89246	2.36437	2.28494
KIF27	6.16279	7.35336	2.28244	6.31472	7.50674	2.28473	2.28358
GNB1L	6.58887	7.64142	2.07419	6.46615	7.78389	2.49276	2.28347
AARS	11.3321	12.4191	2.12429	11.1916	12.4794	2.44162	2.28295
RCOR2	4.12738	5.42105	2.4515	4.23273	5.31284	2.1142	2.28285
SFXN5	8.37257	9.61918	2.37283	8.47113	9.60385	2.19271	2.28277
FOXP1	9.15906	10.3319	2.25448	9.18375	10.391	2.3089	2.28169
TUB	5.58142	6.84873	2.40712	5.72737	6.83074	2.14857	2.27784
SERPINA1	7.21481	8.35757	2.20804	7.20536	8.43451	2.34428	2.27616
HIRIP3	7.66472	8.75026	2.12216	7.57949	8.85924	2.42796	2.27506
PABPC1L	8.14877	9.36067	2.31643	8.35585	9.51485	2.23303	2.27473
ETV7	6.74697	7.98084	2.35197	6.97388	8.10906	2.19646	2.27422
CCDC74B	4.12738	5.42105	2.4515	3.98976	5.05797	2.09682	2.27416
NR6A1	5.43591	6.63121	2.28993	5.63271	6.80471	2.25325	2.27159
ZC3H12B	4.34254	5.47616	2.19409	4.11978	5.35085	2.34742	2.27075
SNRPA	9.55902	10.6996	2.20468	9.45857	10.6779	2.32834	2.26651
HSPE1	8.99347	10.0208	2.03819	8.81628	10.1347	2.49385	2.26602
NDC1	9.17848	10.4112	2.35017	9.04778	10.1731	2.18148	2.26582
PRR7	7.09097	8.16948	2.11186	7.04734	8.32033	2.41663	2.26424
OSGEP	8.28308	9.46741	2.27258	8.37018	9.54252	2.25377	2.26318
METAP1D	6.42977	7.72041	2.44637	6.60293	7.65924	2.0796	2.26299
LTB4R	7.96908	9.2662	2.45738	8.24097	9.28844	2.06691	2.26214
SESN1	8.22017	9.44933	2.34431	8.37493	9.4988	2.17931	2.26181
TRIM66	8.54501	9.61624	2.10122	8.37018	9.64636	2.42197	2.2616
HOXA3	7.48884	8.72861	2.3616	7.636	8.74476	2.1566	2.2591
FOXRED1	8.87941	9.94772	2.09699	8.75936	10.0338	2.41908	2.25803
FLVCR1	7.18208	8.49215	2.47953	7.32818	8.35197	2.03325	2.25639
PTGR2	6.41093	7.64142	2.34646	6.39246	7.50674	2.16486	2.25566
ST6GALNAC2	8.72943	9.78298	2.07563	8.70011	9.98424	2.43535	2.25549
NCOA7	9.95298	11.2608	2.4757	10.1705	11.1956	2.03514	2.25542
FAM111B	8.5016	9.54374	2.05929	8.07004	9.35684	2.43986	2.24958
THOC6	7.35836	8.62697	2.4093	7.90916	8.97112	2.08776	2.24853
TRERF1	8.75553	9.95006	2.2887	8.79165	9.93289	2.2057	2.2472
GTF2H3	8.58716	9.81285	2.33867	8.73374	9.84038	2.15344	2.24605
ITGA1	7.49773	8.59742	2.14309	7.45035	8.68215	2.34859	2.24584
ENO3	5.54649	6.74412	2.29362	5.89907	7.03472	2.19717	2.2454
MRE11	9.04578	10.2093	2.24003	9.09742	10.2673	2.24994	2.24498
NUP107	8.97137	10.13	2.23248	8.96211	10.1359	2.25611	2.2443
TRIB3	9.41908	10.4555	2.0512	9.31541	10.6001	2.43625	2.24372
HSPA4L	9.12228	10.3933	2.41333	9.13425	10.1857	2.07258	2.24296
ACAD10	7.98809	9.17913	2.28317	8.13304	9.27201	2.20223	2.2427
DDB2	10.6645	11.7317	2.09528	10.5413	11.7979	2.38934	2.24231
EIF2A	10.5971	11.643	2.06472	10.5104	11.7843	2.4182	2.24146
SUGP2	9.94976	11.1674	2.32569	10.0992	11.2068	2.15484	2.24026
HOXA5	7.44359	8.57029	2.18359	7.37641	8.57517	2.29543	2.23951
EXOSC8	8.14313	9.33763	2.28866	8.24616	9.37674	2.18947	2.23906
CEP95	8.53643	9.7856	2.37704	8.68491	9.75341	2.09726	2.23715
CCDC146	6.65423	7.95308	2.46032	7.02327	8.033	2.01354	2.23693
IL6R	7.57528	8.63281	2.08136	7.65956	8.91777	2.39199	2.23668
BACH1	9.29238	10.3873	2.13598	9.19452	10.4157	2.33144	2.23371
NOLC1	10.9158	11.9888	2.1038	10.7574	11.9974	2.36211	2.23296
XRCC3	7.73397	8.96215	2.34271	7.83528	8.92079	2.12213	2.23242
WNK4	5.35674	6.59551	2.35998	5.665	6.73747	2.10303	2.23151
HLTF	8.14313	9.31965	2.26031	8.01027	9.14882	2.20159	2.23095
UBE2T	7.13725	8.31825	2.26733	7.11721	8.2501	2.19298	2.23016
CYP27B1	7.25731	8.53954	2.43215	7.46825	8.48837	2.02808	2.23012
ADORA2B	8.51476	9.61329	2.14137	8.39375	9.60385	2.31353	2.22745
CYP2R1	7.98178	9.19105	2.3122	8.14976	9.24579	2.13767	2.22493
CCBE1	7.83547	8.88843	2.07478	7.53772	8.78504	2.374	2.22439
NSD2	9.44451	10.5906	2.21315	9.31047	10.4703	2.23426	2.22371
CHRNA5	5.61546	6.71118	2.13719	5.53094	6.73747	2.30782	2.2225
AGFG2	8.27278	9.32326	2.07122	8.12743	9.37454	2.37366	2.22244
RFC2	8.69516	9.75783	2.0888	8.41234	9.64819	2.3552	2.222
IFNGR1	10.4734	11.6068	2.19376	10.5992	11.7647	2.24319	2.21847
LHX4	5.27251	6.52131	2.37644	5.30076	6.34319	2.05969	2.21806
CROCC	8.11458	9.30144	2.27657	8.21474	9.32077	2.15252	2.21454
HAUS5	7.64887	8.80299	2.22548	7.7862	8.9238	2.20013	2.21281
C1QTNF1	8.7739	9.80641	2.04558	8.69253	9.94331	2.3797	2.21264
LDLRAD3	8.99347	9.9972	2.00518	8.80578	10.0804	2.41936	2.21227
WDR73	6.8619	8.03036	2.24772	6.88312	8.00483	2.17606	2.21189
AARSD1	5.43591	6.54648	2.1593	5.45855	6.63765	2.26436	2.21183
MARK1	6.33298	7.50779	2.25763	6.44809	7.56197	2.16428	2.21096
AIFM3	5.22826	6.25679	2.03993	5.34201	6.59263	2.37943	2.20968
HEY1	4.34254	5.47616	2.19409	4.11978	5.2737	2.22519	2.20964
MRGPRX4	3.99644	5.10437	2.15536	3.62633	4.79727	2.25159	2.20348
MCTP1	4.86618	6.1286	2.39898	5.30076	6.30634	2.00774	2.20336
TKFC	9.00595	10.0118	2.00817	8.87773	10.1385	2.3963	2.20224
NFKBID	6.88925	8.00356	2.16492	7.02327	8.18633	2.23932	2.20212
ANKRD18B	7.13725	8.27409	2.19899	6.96126	8.09844	2.1995	2.19924
CPD	11.3122	12.3411	2.04044	11.1583	12.3952	2.35698	2.19871
PPAT	7.7036	8.80816	2.15032	7.62008	8.78504	2.24227	2.19629
SF3A2	10.1172	11.1764	2.08375	10.1064	11.311	2.30481	2.19428
BLNK	5.77397	6.93673	2.23885	5.97753	7.07876	2.14538	2.19212
ZMYND8	10.6022	11.6142	2.01665	10.5082	11.7508	2.36624	2.19145
BNC1	10.849	11.9522	2.14835	10.74	11.9	2.23452	2.19144
P2RX7	3.99644	5.10437	2.15536	4.11978	5.2737	2.22519	2.19027
MRRF	9.17572	10.2316	2.07895	9.15094	10.3446	2.28725	2.1831
NPHP1	5.43591	6.65452	2.32723	5.8159	6.84358	2.03875	2.18299
LMAN1	10.9517	12.1577	2.30693	10.9737	12.0155	2.0589	2.18291
AREG	12.9749	14.0992	2.17997	13.017	14.1437	2.18353	2.18175
ATF4	12.2389	13.2602	2.02983	12.2656	13.4867	2.33116	2.18049
C14orf79	7.21481	8.24006	2.03531	7.18382	8.40033	2.32383	2.17957
PGGHG	8.77024	9.85465	2.12051	8.93988	10.1005	2.23552	2.17801
IFT172	7.96908	9.15702	2.27828	8.02846	9.08304	2.0771	2.17769
PRKDC	12.0084	13.0353	2.03768	11.6675	12.8796	2.31667	2.17717
VRK1	7.93028	8.9737	2.0611	7.82837	9.02256	2.28816	2.17463
TPP1	10.4587	11.547	2.12624	10.3642	11.5128	2.217	2.17162
IFT81	7.13725	8.21692	2.11354	6.97388	8.13008	2.22869	2.17112
LMNB2	10.9298	11.9664	2.05147	10.7084	11.9023	2.28762	2.16954
TOP1MT	8.97772	9.98013	2.00335	8.93346	10.154	2.33034	2.16684
KCTD15	7.72644	8.74487	2.02572	7.81445	9.01693	2.30135	2.16354
PCBP2	11.1103	12.1567	2.06528	11.0689	12.2442	2.25844	2.16186
PLXNC1	5.35674	6.443	2.12323	5.0722	6.20975	2.20007	2.16165
PRIM2	7.64887	8.7952	2.2135	7.5877	8.66426	2.109	2.16125
PTX3	4.73957	5.91114	2.25256	4.96788	6.01712	2.06944	2.161
TMEM143	5.91604	7.01065	2.13556	6.02747	7.15272	2.18139	2.15847
RRM2	9.21118	10.22	2.01226	8.73004	9.93289	2.30194	2.1571
THNSL1	6.16279	7.18826	2.03563	6.07569	7.26172	2.27527	2.15545
DHX34	8.89291	9.95938	2.09431	8.97467	10.1216	2.21444	2.15437
CENPV	6.33298	7.41578	2.11815	6.44809	7.57737	2.18751	2.15283
ARSJ	8.16556	9.18907	2.03285	8.11613	9.29543	2.26467	2.14876
NCL	13.0876	14.0847	1.99592	12.9548	14.1486	2.28748	2.1417
TARBP1	8.47041	9.54684	2.10882	8.50182	9.62063	2.17168	2.14025
CNOT6L	8.80637	9.96979	2.23989	8.80578	9.83399	2.03951	2.1397
CDKN2C	5.18245	6.30199	2.17277	4.96788	6.03988	2.10235	2.13756
ADCY7	8.12607	9.28671	2.23557	8.17174	9.19439	2.03164	2.1336
MYO1B	12.9537	14.0134	2.08445	12.7759	13.902	2.18268	2.13356
PTK7	11.1009	12.1637	2.08902	11.141	12.2577	2.16856	2.12879
BCL6	8.38696	9.48042	2.13385	8.61844	9.70176	2.1189	2.12637
REEP4	8.99972	10.0439	2.06225	8.96526	10.0952	2.18843	2.12534
SPATS2L	11.8256	12.8361	2.01469	11.7033	12.8626	2.2335	2.1241
MPP2	4.80456	5.851	2.06543	4.33347	5.45872	2.18139	2.12341
BCS1L	8.38696	9.40056	2.01894	8.29706	9.44954	2.22296	2.12095
ATAD2	9.48072	10.5854	2.15044	9.27539	10.3344	2.08353	2.11699
PHLDB1	11.297	12.3281	2.04351	11.1228	12.2535	2.18975	2.11663
SRD5A3	8.60778	9.69924	2.1309	8.58198	9.64454	2.08864	2.10977
CAV1	13.2752	14.3032	2.03928	13.0602	14.1839	2.17913	2.10921
EFHD2	11.7971	12.8823	2.12166	11.7089	12.7758	2.09482	2.10824
PPIH	8.2882	9.29777	2.01331	8.25649	9.39203	2.19702	2.10516
CPSF4	8.5016	9.57742	2.10793	8.58198	9.65363	2.10184	2.10489
MRPS27	9.81798	10.884	2.09363	9.88154	10.9617	2.11425	2.10394
UCN	4.34254	5.47616	2.19409	4.58682	5.5902	2.00469	2.09939
LARS	11.421	12.4246	2.005	11.369	12.4954	2.18313	2.09406
ENKD1	6.67012	7.68709	2.02367	6.69751	7.81019	2.16247	2.09307
UNG	9.09625	10.1352	2.05468	8.97779	10.0696	2.13138	2.09303
THEM4	7.37774	8.46949	2.13132	7.45035	8.47612	2.03604	2.08368
ZNF331	6.76185	7.77957	2.02472	6.66668	7.75711	2.12938	2.07705
GCLC	10.3758	11.3805	2.00655	10.2782	11.374	2.13724	2.0719
RFC5	7.75633	8.81587	2.08427	7.65956	8.6963	2.05158	2.06793
TRIT1	7.89041	8.93169	2.05805	8.01027	9.06407	2.07598	2.06702
REV1	8.8241	9.86585	2.05872	8.83016	9.87344	2.0609	2.05981
TNK2	10.5805	11.6098	2.04098	10.7206	11.7739	2.07534	2.05816
CLCN1	3.99644	5.06797	2.10165	4.4249	5.42373	1.99838	2.05002
ZCCHC7	8.42465	9.47718	2.07417	8.40771	9.42214	2.02009	2.04713
SERPINH1	11.6647	12.67	2.00725	11.6436	12.6988	2.07799	2.04262
ACD	8.52347	9.56679	2.06097	8.56961	9.58686	2.02405	2.04251
NPIPB11	5.3153	6.37425	2.08342	5.38201	6.3791	1.99597	2.0397
RSL24D1	10.2078	11.2361	2.03966	10.382	11.399	2.0238	2.03173
GLT8D2	5.96901	6.97417	2.00716	5.84418	6.88143	2.0523	2.02973
CLSPN	7.14859	8.14925	2.00091	7.1509	8.19134	2.05685	2.02888
WTAP	9.97378	10.9758	2.00283	10.0819	11.0797	1.99692	1.99988

## Sheet: down in HSF1-pLVX
	MCF10A_WT_rep1	MCF10A_HSF1-pLVX_rep1	FOLD CHANGE HSF1-pLVX_1 vs WT_rep1	MCF10A_WT_rep2	MCF10A_HSF1-pLVX_rep2	FOLD CHANGE HSF1-pLVX_2 vs WT_rep2	mean FOLD CHANGE
ANKRD1	11.5655	4.99184	0.0104986	11.8809	4.08474	0.00449907	0.00749883
ADAMTS1	10.5574	3.98152	0.0104826	11.0979	4.29168	0.00893565	0.00970913
PSG6	9.55902	3.11789	0.0115087	9.46748	3.11789	0.0122626	0.0118857
CPA4	11.1897	5.10437	0.0147275	11.2928	4.9083	0.0119696	0.0133485
GJA5	12.0451	6.3601	0.0194377	11.9584	5.38779	0.010521	0.0149793
TUBA1A	13.6765	7.8515	0.0176403	13.7108	7.60017	0.0144711	0.0160557
NID2	10.3356	4.39104	0.016237	10.2668	4.29168	0.0158971	0.016067
PSG4	11.7404	5.89138	0.0173487	11.6139	5.92214	0.0193475	0.0183481
PSG5	9.61099	3.98152	0.0202003	9.60302	3.959	0.0199978	0.0200991
REEP1	8.91624	3.55451	0.0243198	9.04778	3.11789	0.0164031	0.0203614
MARCH4	10.2145	4.82386	0.0238368	10.1595	4.53749	0.0203045	0.0220707
PSG2	8.88279	3.73305	0.0281692	8.99945	3.11789	0.0169619	0.0225655
KRT34	8.76658	3.55451	0.0269781	8.8844	3.11789	0.01837	0.022674
MFAP5	11.1628	5.94983	0.026961	11.23	5.52607	0.0191837	0.0230723
TAGLN	12.9801	7.95308	0.0306712	12.9421	7.94679	0.0313514	0.0310113
CLIC3	10.4924	5.98746	0.0440446	10.3796	5.10412	0.0258178	0.0349312
INHBB	8.79921	4.08001	0.0379644	8.69253	3.80783	0.0338501	0.0359073
SHISA9	8.96179	4.32228	0.0401207	8.87103	3.959	0.0332149	0.0366678
TGFB2	10.57	6.07733	0.0444183	10.6312	5.52607	0.0290532	0.0367357
SERPINB2	14.5206	10.1186	0.047302	14.5785	9.34566	0.0265917	0.0369468
CNTN3	7.75633	3.11789	0.0401504	7.97318	3.11789	0.0345472	0.0373488
DIRC3	7.59196	3.11789	0.0449956	7.77906	3.11789	0.039523	0.0422593
CRCT1	7.68818	3.55451	0.0569696	7.91569	3.11789	0.0359517	0.0464606
PDGFB	11.3827	7.36747	0.0618457	11.5529	6.63765	0.0331407	0.0474932
ADAMTS14	9.17019	5.1742	0.0626739	9.87318	5.1917	0.0389703	0.0508221
DPYSL3	8.54928	4.16813	0.047989	8.37966	4.19408	0.0549561	0.0514726
L1CAM	10.9257	6.81814	0.0580108	10.8641	6.51427	0.0490427	0.0535268
SYT14	8.27278	4.62824	0.079962	8.78097	3.60805	0.0277203	0.0538411
PLCB4	10.4416	6.4159	0.0613967	10.4919	6.06228	0.0464026	0.0538996
SEMA7A	11.176	7.50141	0.0783145	11.4772	6.46508	0.0309887	0.0546516
DYSF	10.9693	6.87867	0.0586931	10.8548	6.68129	0.0554186	0.0570558
STAC	7.69591	4.08001	0.0815651	7.96691	3.11789	0.0346978	0.0581314
CDH2	9.18124	5.36355	0.0709189	9.05962	4.67476	0.0478659	0.0593924
GPRC5A	16.2984	12.5571	0.0747729	16.2921	11.9133	0.0480658	0.0614193
TUBB3	9.48519	5.60477	0.0679014	9.79395	5.68104	0.0577951	0.0628483
NAALADL2	8.37738	4.68033	0.0771039	8.64618	4.38032	0.0519814	0.0645426
MGLL	13.5448	9.77244	0.0731821	13.4161	9.27437	0.0566502	0.0649162
MYL9	10.933	6.91764	0.0618361	10.8377	6.98928	0.069424	0.06563
WNT7A	10.3369	6.70003	0.0803908	10.3606	6.16918	0.0547332	0.067562
WNT5B	9.06678	4.99184	0.0593364	8.93346	5.23335	0.0769408	0.0681386
CACNG4	9.6788	6.07733	0.0823852	9.64877	5.52607	0.0574041	0.0698947
IGFL1	13.4418	9.94655	0.0886787	13.5835	9.37014	0.0539086	0.0712937
CD24	15.7398	12.4009	0.09883	15.9294	11.4422	0.0445883	0.0717092
TINCR	10.3504	6.73322	0.081495	10.3796	6.3791	0.0624776	0.0719863
TMEM86A	9.45365	5.74454	0.0764619	9.34714	5.45872	0.0675259	0.0719939
SHROOM4	7.32878	3.73305	0.0827137	7.11721	3.11789	0.0625296	0.0726217
TUBB2A	9.83031	5.98746	0.0696928	9.76172	6.03988	0.0757903	0.0727416
ATP6V0A4	8.57883	4.82386	0.0740699	8.25649	4.46183	0.0720603	0.0730651
TUFT1	11.8608	8.23238	0.0808623	11.8801	7.94679	0.0654583	0.0731603
NR3C2	7.89714	3.86853	0.0612732	7.83528	4.29168	0.0857573	0.0735152
ANO1	9.09041	5.67645	0.0938199	9.08009	4.9083	0.0554837	0.0746518
SCD5	12.2563	8.77422	0.0894938	12.3302	8.30656	0.0614829	0.0754884
KRT80	12.1076	8.81331	0.101936	12.1242	7.81668	0.0505013	0.0762186
TMEM139	9.09041	5.62909	0.0907901	9.05075	5.05797	0.0628135	0.0768018
ANOS1	8.204	4.62824	0.0838664	8.15528	4.38032	0.0730504	0.0784584
IL1R2	8.17112	4.82386	0.0982595	8.16079	4.08474	0.0592907	0.0787751
EPPK1	10.9883	7.44268	0.0856356	10.8169	7.05691	0.0738104	0.079723
NOG	8.51038	4.99184	0.0872594	8.63831	4.85407	0.0725819	0.0799206
C4orf26	7.56687	4.24835	0.100237	7.6439	3.60805	0.0609663	0.0806014
SPINK6	6.87564	3.55451	0.100055	7.12853	3.11789	0.0620409	0.0810482
ANO4	6.55503	3.11789	0.0923249	6.93569	3.11789	0.0709136	0.0816193
MAP1B	11.8317	8.24006	0.0829472	11.6718	8.03857	0.080589	0.0817681
CCDC80	13.9175	10.3201	0.0826211	13.4818	9.86876	0.0817287	0.0821749
FST	10.3794	6.95557	0.0931788	10.4077	6.63765	0.0733019	0.0832403
TP53INP2	10.9765	7.436	0.0859425	10.8974	7.29007	0.0820498	0.0839962
IGFBP3	12.7535	9.4427	0.100775	12.661	8.77174	0.067487	0.0841309
NEGR1	7.06726	3.55451	0.0876109	7.23707	3.60805	0.0808274	0.0842191
KRT14	13.4619	9.90496	0.0849669	13.3585	9.79837	0.0847802	0.0848735
ID4	7.31879	3.55451	0.0735935	7.17293	3.80783	0.0970516	0.0853226
ADAMTS6	7.78562	4.39104	0.0950891	8.01027	4.29168	0.0759612	0.0855252
HIST1H2BC	8.20941	4.73016	0.0896686	8.21474	4.60823	0.0820981	0.0858833
ZNF365	9.53984	6.40215	0.113622	9.44285	5.45872	0.0631914	0.0884067
KRTAP2-4	7.171	3.55451	0.0815318	6.5016	3.11789	0.0958079	0.0886699
MAP2	11.3439	8.18547	0.112003	11.4273	7.49867	0.0656709	0.0888368
BPGM	12.0226	8.63572	0.0955957	12.0191	8.41324	0.0821357	0.0888657
NEXN	8.23616	4.86808	0.0968517	8.35104	4.79727	0.0851548	0.0910032
PKIB	8.38218	5.1742	0.108218	8.61042	4.85407	0.0739988	0.0911086
GAB2	10.5857	7.26567	0.100131	10.536	6.94235	0.082833	0.0914822
DTNA	7.22555	4.16813	0.120123	7.5877	3.60805	0.0633879	0.0917552
HS3ST2	8.04971	4.95195	0.116811	8.03448	4.19408	0.0698113	0.0933109
MX1	11.4657	8.2208	0.105482	11.0371	7.42395	0.0817207	0.0936016
PDCD1LG2	9.10788	5.50288	0.0821842	8.95896	5.7662	0.109366	0.0957753
ADRA1B	8.93594	5.78812	0.112827	8.86767	5.23335	0.0805307	0.0966787
VSTM2L	12.8762	9.51875	0.0975664	12.587	9.22154	0.0970246	0.0972955
MYEF2	8.69516	5.55479	0.113411	8.85754	5.2737	0.0833986	0.0984049
TMEM27	9.06975	5.83036	0.105887	9.1647	5.71002	0.091209	0.0985482
PODXL2	7.93028	4.39104	0.0860166	7.62807	4.46183	0.111396	0.0987062
LMO7	12.3082	9.2009	0.11604	12.2421	8.6425	0.0824901	0.0992648
MALL	11.0848	7.76899	0.100423	10.9372	7.59261	0.0984383	0.0994306
TTC9	12.326	9.232	0.117111	12.2483	8.63884	0.081931	0.0995211
RAB6B	8.15439	4.95195	0.108635	8.42612	4.96022	0.0905027	0.0995691
SLAMF7	8.51476	5.10437	0.0940528	8.58198	5.35085	0.106496	0.100274
MITF	8.95537	5.55479	0.0946942	8.86092	5.62116	0.105861	0.100278
BDNF	8.78842	5.47616	0.100672	8.79873	5.49282	0.101116	0.100894
AC004231.7	6.67012	3.11789	0.085246	6.21108	3.11789	0.117181	0.101213
ADGRL2	9.25627	6.25679	0.125044	9.21583	5.52607	0.0774948	0.10127
FAM26E	7.90383	4.77794	0.114555	7.92866	4.46183	0.090444	0.1025
PGM2L1	9.90882	7.03741	0.136653	10.224	6.36126	0.068736	0.102695
MACC1	12.3332	9.4427	0.134859	12.4896	8.71031	0.0728332	0.103846
KRT8	16.0017	12.9144	0.11766	15.9714	12.503	0.090347	0.104004
HIST1H4H	7.84941	4.86808	0.126628	8.29205	4.67476	0.0814867	0.104057
CDA	8.59544	5.20774	0.095543	8.33164	5.1917	0.113444	0.104494
THBS1	16.9903	13.9608	0.122471	17.0122	13.4846	0.0867134	0.104592
SERPINB7	11.3046	8.29265	0.123966	11.2978	7.77056	0.0867361	0.105351
LIPG	11.588	8.69273	0.134414	11.8261	8.13008	0.0771582	0.105786
KRT81	16.8521	13.8894	0.128269	16.7684	13.199	0.0842384	0.106254
NALCN	9.07568	6.02411	0.12061	9.19452	5.7662	0.0928906	0.106751
SHC2	7.71887	4.73016	0.125982	7.72055	4.29168	0.0928554	0.109419
SLC44A2	14.1944	11.1456	0.120842	14.1379	10.7885	0.0981115	0.109477
TPM1	14.0521	10.9101	0.113282	14.168	10.9269	0.105759	0.10952
PLD5	8.80637	5.72221	0.117917	8.7881	5.49282	0.101864	0.109891
EDN1	10.9216	8.15738	0.147196	11.2789	7.56197	0.0760471	0.111622
ENC1	12.8464	10.1082	0.149871	13.1358	9.43906	0.0771203	0.113496
CCND1	15.2691	12.2768	0.125676	15.2505	11.974	0.1032	0.114438
TGM2	13.0549	10.0548	0.124991	12.7986	9.53467	0.104102	0.114547
NCF2	10.0586	7.06368	0.125444	10.0136	6.75117	0.10421	0.114827
PMEPA1	13.556	10.6587	0.134224	13.5001	10.115	0.0957206	0.114972
DKK3	9.06975	5.96877	0.11655	8.97467	5.84637	0.114364	0.115457
CST6	13.5369	10.541	0.125359	13.4302	10.1919	0.105973	0.115666
PDE1C	8.61594	5.65297	0.12825	8.72261	5.45872	0.104105	0.116177
OSBP2	10.7477	7.71491	0.122192	10.6062	7.43245	0.110814	0.116503
DKK1	11.674	8.91502	0.147724	11.5726	8.07154	0.0883202	0.118022
ARFGEF3	9.66707	6.9649	0.153662	9.61108	6.01712	0.082815	0.118239
TNFSF15	10.4957	7.81084	0.155519	10.8394	7.22304	0.0815381	0.118529
CYR61	13.1166	10.1134	0.12472	13.3078	10.1731	0.113858	0.119289
CLIC5	8.5278	5.78812	0.149717	8.49748	5.01005	0.0891621	0.11944
RAB15	9.96422	7.11482	0.138754	10.0377	6.75117	0.102482	0.120618
KLK5	14.6822	11.939	0.149353	14.6179	11.2068	0.0940059	0.121679
FAM174B	7.82846	4.73016	0.116767	7.57949	4.60823	0.127515	0.122141
TP53I3	13.3303	10.3083	0.123113	13.2933	10.2518	0.121457	0.122285
HEPH	8.86578	5.7665	0.116688	8.51478	5.55852	0.128848	0.122768
COL5A1	6.90272	3.98152	0.132017	7.0943	3.959	0.113811	0.122914
VGLL1	9.9562	7.04622	0.133048	9.74533	6.6078	0.113634	0.123341
TSPAN2	7.04315	4.32228	0.151683	7.45035	4.08474	0.0970178	0.124351
BSPRY	9.17572	6.54648	0.161628	9.30053	5.79345	0.0879552	0.124792
FOLR1	7.90383	4.86808	0.121941	7.6439	4.67476	0.127702	0.124822
DNAJC6	10.2306	7.31018	0.132093	10.2175	7.13197	0.117808	0.124951
CTXN1	10.0005	6.92722	0.118807	9.88487	6.95423	0.131156	0.124982
SCEL	12.9555	10.2983	0.15852	13.1017	9.66985	0.0926637	0.125592
TCEAL8	9.05782	6.07733	0.126702	9.00864	6.01712	0.125737	0.12622
TMEM178B	8.16556	5.06797	0.116824	7.84215	4.96022	0.135661	0.126242
EPGN	11.2108	8.25906	0.129257	11.1157	8.09844	0.123513	0.126385
LBH	10.2828	7.41578	0.137073	10.396	7.29007	0.116147	0.12661
C5orf46	6.62193	3.11789	0.0881413	6.55317	3.959	0.165607	0.126874
PSG9	6.48481	3.55451	0.131187	6.14502	3.11789	0.122671	0.126929
KRTAP2-3	6.5378	3.11789	0.0934342	5.75752	3.11789	0.16047	0.126952
BCAT1	9.17019	6.61941	0.170663	9.40161	5.82016	0.0835367	0.1271
ST6GALNAC5	8.98088	6.28708	0.154556	9.01473	5.71002	0.101201	0.127878
LZTS3	9.62724	6.65452	0.127386	9.42467	6.46508	0.128551	0.127969
HIST2H2BE	9.08747	6.34579	0.14951	9.46081	6.22961	0.106491	0.128001
RTKN2	8.52347	5.93062	0.165758	9.04183	5.5902	0.0914024	0.12858
HIST1H1C	10.4868	7.53303	0.12907	10.3426	7.3807	0.128348	0.128709
HIST1H2BD	10.4347	7.51414	0.132077	10.2319	7.25215	0.126766	0.129421
PDLIM2	9.10788	6.30199	0.143003	9.1454	6.03988	0.116184	0.129593
APCDD1	6.5378	3.98152	0.170013	6.58654	3.11789	0.0903303	0.130172
NLRP3	9.46499	6.71118	0.148258	9.40625	6.28754	0.115126	0.131692
CYP4B1	10.2212	7.38144	0.139681	10.1975	7.19332	0.124637	0.132159
IVL	11.8304	9.25867	0.168201	12.0668	8.70332	0.0971636	0.132683
SOWAHB	9.969	7.38837	0.167168	9.82721	6.49806	0.0995008	0.133334
STEAP4	10.7798	8.25528	0.173795	10.7985	7.39816	0.0947079	0.134251
WNT9A	10.0435	7.2955	0.148855	10.1485	7.08956	0.119996	0.134425
KCNJ15	10.1736	7.28066	0.134626	10.0075	7.13197	0.136262	0.135444
HSD3B1	6.09323	3.11789	0.127155	5.89907	3.11789	0.145473	0.136314
OVOL1	9.38366	6.71118	0.156857	9.45186	6.34319	0.11593	0.136394
CERCAM	12.0923	9.29225	0.143582	12.0483	9.0991	0.129477	0.13653
C1orf116	13.5307	10.7575	0.146277	13.4323	10.4703	0.128333	0.137305
NFATC2	7.19307	4.24835	0.129882	7.22657	4.46183	0.14714	0.138511
DCLK2	6.44836	3.55451	0.134545	6.41125	3.60805	0.14327	0.138907
HIST1H2AC	10.7421	8.1775	0.169035	10.942	7.75034	0.109446	0.139241
PCDHA12	7.60023	4.73016	0.13678	7.19463	4.38032	0.14217	0.139475
KRT16	13.6291	10.8279	0.143461	13.5159	10.6363	0.135883	0.139672
LGR6	6.94241	4.45546	0.178383	7.0943	3.80783	0.102489	0.140436
SAMD4A	11.6677	9.02343	0.159956	11.7597	8.72764	0.122255	0.141105
CDR2L	11.6775	8.91981	0.147864	11.5814	8.6857	0.134372	0.141118
KRT86	10.4924	8.01255	0.179268	10.3773	7.11093	0.103929	0.141599
MYH14	13.3576	10.7203	0.160725	13.1488	10.1268	0.123108	0.141916
PTPRB	9.48741	7.08948	0.189736	9.61509	6.20975	0.094382	0.142059
HID1	10.7015	7.97164	0.150746	10.6263	7.72292	0.133661	0.142203
AMOTL2	12.7798	10.104	0.156491	12.7136	9.76184	0.129247	0.142869
GRAMD3	12.0642	9.32506	0.149771	12.1305	9.25777	0.136524	0.143147
QPCT	9.58628	6.92722	0.158322	9.52622	6.5773	0.129505	0.143914
PGBD5	10.4473	7.84145	0.164268	10.4215	7.40681	0.123736	0.144002
RALGPS1	8.2572	5.60477	0.159052	8.29205	5.35085	0.1302	0.144626
PPM1H	7.74892	4.82386	0.131665	7.39525	4.73762	0.15848	0.145072
LIPH	10.5669	8.1121	0.182405	10.6587	7.44929	0.10811	0.145258
SYT1	6.74697	4.16813	0.167376	6.82854	3.80783	0.123219	0.145297
ATL1	9.13937	6.31674	0.141353	9.15646	6.41412	0.149442	0.145398
TMPRSS11E	6.8619	4.51616	0.196725	7.01108	3.60805	0.0945337	0.145629
GULP1	8.3085	5.8094	0.176887	8.31692	5.1917	0.114608	0.145747
WWC1	13.0455	10.3743	0.156989	12.9061	10.0408	0.137228	0.147109
FBN1	10.6033	7.80568	0.143828	10.1881	7.45764	0.150676	0.147252
AIM1L	10.9867	8.32548	0.158081	10.938	8.07696	0.137634	0.147857
TMC6	11.1808	8.57333	0.164086	11.1842	8.27861	0.133455	0.148771
SLC35F3	7.73397	5.03048	0.153521	7.57124	4.79727	0.146202	0.149862
HMOX1	8.43391	6.07733	0.195253	8.60235	5.35085	0.105003	0.150128
SLC1A1	7.19307	4.57362	0.162729	7.23707	4.38032	0.138049	0.150389
TIMP2	14.0088	11.304	0.153385	13.883	11.1288	0.148213	0.150799
SLIT3	6.57205	4.08001	0.177754	6.81456	3.80783	0.124418	0.151086
HMGB3	11.7631	9.14277	0.162631	11.8403	9.01411	0.141002	0.151816
SYT17	8.00063	5.33384	0.157476	7.92219	5.14866	0.146246	0.151861
ABCA3	8.59544	5.69952	0.134351	8.43068	5.87209	0.169741	0.152046
IL36RN	6.99367	4.57362	0.18685	7.16196	4.08474	0.118485	0.152668
FAM189A2	7.25731	4.73016	0.173481	7.20536	4.29168	0.132707	0.153094
VGLL3	11.8736	9.47393	0.189508	11.9024	8.80477	0.11682	0.153164
LAYN	8.02538	5.60477	0.186778	8.16079	5.10412	0.120185	0.153481
ABAT	9.63328	7.09798	0.172503	9.72505	6.84358	0.135704	0.154104
ELFN2	9.4582	6.75493	0.153545	9.3277	6.66689	0.158131	0.155838
EDIL3	6.20731	3.73305	0.17996	6.02747	3.11789	0.133085	0.156523
IL1RN	9.8803	7.15608	0.151331	9.68168	7.06788	0.163368	0.15735
CCNJL	9.87351	7.21192	0.158046	9.88487	7.2132	0.156945	0.157495
ADAMTS9	11.2843	8.93406	0.196114	11.1896	8.13528	0.120384	0.158249
PRUNE2	7.31879	4.95195	0.19387	7.31834	4.29168	0.122711	0.158291
PTPRR	6.65423	4.16813	0.178488	6.65101	3.80783	0.139354	0.158921
PCSK1N	9.37647	6.60751	0.146711	9.29053	6.80471	0.178523	0.162617
MGARP	6.27154	3.86853	0.18907	6.82854	3.959	0.136831	0.16295
DUSP4	13.0756	10.6551	0.18679	13.1426	10.3196	0.14132	0.164055
PRR9	5.61546	3.11789	0.177075	5.84418	3.11789	0.151114	0.164094
CGN	11.4837	9.01898	0.181155	11.4375	8.67859	0.147734	0.164445
LGALS9	9.55478	7.13147	0.186428	9.40393	6.59263	0.142467	0.164447
NECTIN4	10.9363	8.62111	0.200935	11.0408	8.08236	0.128649	0.164792
DYNC1I1	6.42977	3.98152	0.183233	6.56995	3.80783	0.147407	0.16532
SLC26A2	11.0626	8.61522	0.183342	10.9571	8.19633	0.14754	0.165441
SLC2A12	9.94491	7.60023	0.196871	9.98132	7.08956	0.134739	0.165805
DDAH1	10.3997	8.07396	0.199478	10.481	7.56969	0.132928	0.166203
KIAA1549L	9.94329	7.53303	0.188122	9.94511	7.15272	0.144347	0.166234
KRT17	17.1953	14.5397	0.15871	17.1461	14.6247	0.174179	0.166444
KIF3C	11.443	8.9737	0.180583	11.3926	8.67859	0.152404	0.166493
KRT34	6.18522	3.11789	0.1193	5.34201	3.11789	0.214029	0.166665
GOLT1A	7.59196	4.95195	0.160427	7.5877	5.05797	0.17317	0.166799
FRAS1	10.1258	7.58221	0.17151	10.0014	7.38946	0.163579	0.167545
NOSTRIN	5.96901	3.11789	0.138589	6.14502	3.80783	0.197895	0.168242
UNC13D	9.21656	6.85878	0.19509	9.2855	6.46508	0.141569	0.16833
MCAM	12.645	10.2083	0.184707	12.5962	9.8781	0.151973	0.16834
ABLIM2	7.64887	4.77794	0.136699	7.17293	4.85407	0.200424	0.168562
CYP2J2	6.99367	4.73016	0.208265	7.03536	4.08474	0.129353	0.168809
FAM171B	9.46725	7.09798	0.193543	9.41549	6.6228	0.144317	0.16893
PARD3B	8.60778	6.17805	0.185601	8.51047	5.82016	0.15493	0.170265
GIPR	7.19307	4.73016	0.18138	7.65175	5.01005	0.16024	0.17081
FNDC4	9.04275	6.54648	0.177233	8.95262	6.36126	0.165928	0.171581
PRSS23	11.2591	8.69273	0.168827	11.1472	8.62781	0.174412	0.17162
TMEM2	11.0834	8.67869	0.188852	11.1617	8.46789	0.154553	0.171702
ZNF470	6.68582	4.08001	0.164275	6.77178	4.29168	0.179231	0.171753
RFLNA	7.44359	4.57362	0.136789	7.07101	4.79727	0.206793	0.171791
C2orf54	9.54626	7.36747	0.22086	9.64289	6.6228	0.123272	0.172066
MYEOV	8.34827	6.1286	0.214691	8.43977	5.49282	0.129682	0.172186
PRRT4	7.91049	5.33384	0.16763	7.84215	5.35085	0.177846	0.172738
GPAT3	7.98178	5.58001	0.189232	8.07588	5.42373	0.159083	0.174157
CRACR2B	8.73319	6.40215	0.198742	8.86092	6.12739	0.150358	0.17455
COL4A1	12.182	9.66262	0.174423	12.094	9.57925	0.174981	0.174702
PLAT	13.536	11.0697	0.180959	13.5925	11.0317	0.169476	0.175217
HIST1H2BG	8.40121	5.89138	0.175577	8.6618	6.14844	0.175148	0.175362
SERPING1	10.489	7.8515	0.160704	10.3414	7.9527	0.190959	0.175832
RSAD2	11.1326	8.7978	0.19823	10.8317	8.14564	0.155389	0.17681
APBB1	8.31353	5.44889	0.137295	8.02243	5.82016	0.217297	0.177296
STARD8	6.90272	4.45546	0.183358	6.92272	4.38032	0.171656	0.177507
DMTN	10.4067	7.82111	0.166591	10.254	7.84874	0.188781	0.177686
DOCK3	7.84941	5.65297	0.218176	7.96691	5.10412	0.137473	0.177825
NAT1	8.4659	6.05982	0.188668	8.56131	5.99397	0.168715	0.178691
SLC16A2	11.5973	9.10758	0.178043	11.3529	8.89034	0.181423	0.179733
RGMA	8.57883	6.27202	0.202107	8.31198	5.65143	0.158159	0.180133
GUCY1B3	7.47991	5.20774	0.207018	7.54617	4.85407	0.154737	0.180878
NXF3	5.91604	3.55451	0.194586	5.69654	3.11789	0.167398	0.180992
TLR4	10.2943	8.01702	0.206294	10.2527	7.57737	0.156551	0.181422
RAET1L	7.53271	5.27231	0.208713	7.88938	5.1917	0.154141	0.181427
MMP24	7.86321	5.39261	0.180417	7.84215	5.38779	0.182459	0.181438
LIF	12.3837	10.3778	0.24898	12.9794	9.8499	0.114271	0.181625
KDELR3	9.70391	7.32472	0.192218	9.57031	7.0235	0.171133	0.181675
SULT2B1	7.36808	5.1742	0.218562	7.39525	4.60823	0.144885	0.181723
TLR2	6.4667	4.08001	0.19122	6.82854	4.29168	0.172318	0.181769
SHANK2	6.84803	4.57362	0.206697	7.04734	4.38032	0.157452	0.182074
ZPLD1	6.71672	4.08001	0.160794	6.48399	4.19408	0.204489	0.182641
TGFA	13.0328	10.6786	0.195569	13.0189	10.4651	0.170306	0.182937
FLG	7.51533	5.1742	0.197356	7.2884	4.73762	0.170663	0.184009
FAM83E	9.00595	6.65452	0.195952	8.97779	6.4483	0.1732	0.184576
ROR1	8.97137	6.53395	0.184613	8.84733	6.41412	0.185153	0.184883
HTR1D	6.79116	4.62824	0.223304	7.30843	4.53749	0.146509	0.184907
WIPI1	9.32012	6.92722	0.190398	9.37345	6.91829	0.182358	0.186378
PSG1	5.86095	3.73305	0.228791	5.89907	3.11789	0.145473	0.187132
KCNK15	7.58365	5.42105	0.223353	7.32818	4.60823	0.151779	0.187566
TMPRSS13	9.59869	7.32472	0.20676	9.44736	6.89382	0.170336	0.188548
ILDR1	7.14859	4.95195	0.218146	7.38586	4.73762	0.159515	0.18883
FN1	17.8574	15.6519	0.216804	17.8276	15.1952	0.161283	0.189044
LAMA2	7.19307	4.95195	0.211522	7.04734	4.46183	0.166604	0.189063
SPOCK1	10.5241	8.01702	0.175906	10.3808	8.07696	0.202523	0.189215
GOLGA7B	8.27278	6.09463	0.220959	8.22002	5.55852	0.158055	0.189507
HIST1H2BE	6.41093	4.08001	0.198756	6.55317	4.08474	0.180688	0.189722
ADPRH	6.37249	3.86853	0.176292	6.25346	3.959	0.203845	0.190069
KCNC3	6.37249	4.16813	0.21698	6.56995	3.959	0.163691	0.190336
IGSF22	5.99476	3.55451	0.184252	6.29459	3.959	0.198115	0.191184
SV2B	8.62811	6.3601	0.207616	8.53188	6.01712	0.174977	0.191297
ADAM19	11.6944	9.4625	0.212876	11.7871	9.2482	0.172078	0.192477
PLA2G16	11.6009	9.2511	0.196175	11.4633	9.0586	0.188843	0.192509
OPN3	9.83382	7.44268	0.190632	9.77793	7.41541	0.194451	0.192541
CPED1	5.74371	3.55451	0.219274	5.69654	3.11789	0.167398	0.193336
RCAN2	5.83256	3.11789	0.152336	5.69654	3.60805	0.235127	0.193732
SVEP1	10.0631	7.66443	0.189646	9.91937	7.58501	0.198285	0.193965
KIAA1462	7.23622	4.73016	0.176036	6.90964	4.67476	0.212438	0.194237
TNFRSF10C	7.44359	4.99184	0.182788	7.55458	5.2737	0.205773	0.194281
CRB3	9.70199	7.2955	0.188614	9.62309	7.32701	0.203616	0.196115
TPST1	8.16556	5.89138	0.20673	8.16628	5.7384	0.185838	0.196284
NEDD9	12.0295	9.58648	0.183895	11.8476	9.58876	0.20894	0.196418
SOX4	13.0288	10.8931	0.227559	13.1707	10.5821	0.166251	0.196905
FAP	11.9635	9.84463	0.230228	12.1019	9.49273	0.163898	0.197063
MGAT5B	7.8214	5.78812	0.244297	7.86258	5.14866	0.152415	0.198356
DENND1C	9.50949	7.41578	0.234278	9.59491	6.97769	0.162982	0.19863
SUSD1	7.64887	5.47616	0.221794	7.55458	5.05797	0.177193	0.199493
MYLK	9.65721	7.33911	0.200532	9.54318	7.2132	0.198887	0.19971
VIPR1	7.26774	5.03048	0.212089	7.31834	4.9083	0.188151	0.20012
POLB	10.51	8.27782	0.21284	10.6655	8.25967	0.188699	0.200769
RNF150	6.87564	4.24835	0.161848	6.25346	4.19408	0.239919	0.200884
KRT83	7.91712	4.16813	0.0743778	5.56572	3.959	0.328345	0.201361
UBL3	10.9796	8.67303	0.202134	11.0046	8.68924	0.200915	0.201524
VWA5A	11.6183	9.32506	0.204024	11.4744	9.14624	0.199134	0.201579
NMNAT2	11.0309	8.7795	0.210018	10.9211	8.55201	0.193565	0.201791
GLRX	9.91048	7.80049	0.231649	10.0963	7.56197	0.172615	0.202132
KANK4	7.94333	5.93062	0.247807	7.77906	5.10412	0.156591	0.202199
VLDLR	8.20941	6.05982	0.225376	8.36542	5.89734	0.180732	0.203054
OPHN1	9.30253	6.9649	0.197835	9.38054	7.12149	0.208909	0.203372
DAPP1	11.604	9.55301	0.241324	11.756	9.16417	0.16587	0.203597
CPNE4	7.06726	5.06797	0.250123	6.96126	4.29168	0.157172	0.203647
ATP8A2	6.42977	4.45546	0.254492	6.5016	3.80783	0.154559	0.204525
GLI2	5.43591	3.55451	0.27142	5.97753	3.11789	0.137773	0.204597
HES2	12.4511	10.2677	0.220155	12.6	10.1994	0.189383	0.204769
C15orf52	12.7222	10.7292	0.251215	12.8324	10.1781	0.158851	0.205033
ENPP4	6.57205	4.62824	0.259929	6.92272	4.19408	0.150868	0.205398
TARSL2	9.43301	7.19619	0.212154	9.63104	7.29939	0.198657	0.205406
INPP4A	10.756	8.53954	0.215166	10.7915	8.44292	0.196346	0.205756
DAGLA	9.08159	6.85878	0.214223	9.02985	6.69554	0.198292	0.206257
ADAMTSL3	6.48481	4.45546	0.244965	6.53619	3.959	0.167567	0.206266
TNRC6C	8.00063	5.52909	0.180299	7.75739	5.65143	0.232296	0.206298
ARHGAP31	10.1681	7.87635	0.204228	9.90304	7.6447	0.209012	0.20662
HIST2H2AA3	6.67012	4.24835	0.186628	6.60293	4.46183	0.226707	0.206667
GPRIN2	6.70136	4.39104	0.201616	6.69751	4.46183	0.212322	0.206969
GATA3	11.1389	8.8663	0.206951	11.0175	8.74816	0.20742	0.207186
SAMD9L	10.7196	8.73405	0.252525	10.728	8.10376	0.162191	0.207358
NAV3	7.84246	5.39261	0.18303	7.4947	5.38779	0.232144	0.207587
LRP3	9.66903	7.13972	0.173222	9.33502	7.29007	0.242331	0.207776
CSF1R	9.10788	6.85878	0.210355	8.80928	6.53029	0.206041	0.208198
PTGS2	12.6302	10.6996	0.262313	12.766	10.0696	0.154272	0.208292
DBN1	13.1276	10.838	0.204536	13.0792	10.8451	0.212559	0.208548
SMOC1	9.38366	7.2955	0.235181	9.29304	6.84358	0.18308	0.20913
SEMA3C	12.2021	9.94186	0.208738	12.0889	9.83719	0.209969	0.209354
NEK7	11.0117	8.92457	0.235348	11.1774	8.73451	0.183914	0.209631
TM4SF1	12.0249	10.0285	0.250624	12.2047	9.63906	0.168918	0.209771
RIMS2	5.83256	3.73305	0.233337	6.02747	3.60805	0.186932	0.210135
FSTL3	12.7046	10.48	0.213966	12.661	10.3964	0.208106	0.211036
TNFRSF11B	5.77397	3.11789	0.15865	5.53094	3.60805	0.263727	0.211189
SLC15A2	8.02538	5.851	0.221537	7.80744	5.49282	0.201016	0.211276
PIP4K2C	12.5263	10.2306	0.203666	12.3982	10.2093	0.21932	0.211493
CUEDC1	10.9249	8.73133	0.218617	10.8641	8.57517	0.20463	0.211624
ADAMTS15	7.19307	5.30343	0.269874	7.4947	4.79727	0.154168	0.212021
FRMD5	7.7036	5.55479	0.225498	7.60399	5.2737	0.198845	0.212172
RHOBTB1	8.24672	6.07733	0.222305	8.39842	6.10602	0.204136	0.213221
IFIT2	11.9889	9.79734	0.218922	11.9663	9.69825	0.207616	0.213269
FAM134B	8.25197	6.05982	0.218825	8.0817	5.82016	0.208549	0.213687
FILIP1L	7.14859	5.03048	0.230348	6.94853	4.60823	0.197469	0.213909
MISP	12.4771	10.3102	0.222688	12.3445	10.0655	0.206039	0.214364
GBP6	7.28838	5.1742	0.230977	7.44131	5.10412	0.197896	0.214436
GPRC5D	7.45276	5.67645	0.291929	8.01636	5.14866	0.137005	0.214467
DNAJB4	10.6165	8.45966	0.224242	10.7646	8.48021	0.205273	0.214757
B4GALT4	10.6176	8.52706	0.234799	10.7271	8.36975	0.195152	0.214976
ADAM8	11.0347	8.98743	0.241938	11.2598	8.84977	0.188148	0.215043
KLHDC7A	6.83403	4.95195	0.271294	6.72768	4.08474	0.160101	0.215698
RNF182	5.39692	3.11789	0.206037	5.25817	3.11789	0.226836	0.216437
KLK7	14.3333	12.4642	0.27374	14.3749	11.7495	0.162067	0.217904
MX2	6.71672	4.82386	0.269272	6.39246	3.80783	0.166705	0.217988
GATA2	8.09133	5.94983	0.226644	8.12179	5.87209	0.210268	0.218456
EPHA4	6.99367	5.06797	0.263213	7.24748	4.73762	0.175573	0.219393
SLC17A5	9.93189	7.84648	0.23563	9.96411	7.68078	0.205423	0.220526
PLK2	12.9531	11.0713	0.271341	13.2831	10.7389	0.171449	0.221395
C10orf35	8.0376	5.851	0.219669	8.33164	6.16918	0.223374	0.221521
GUCY1A3	6.25046	4.16813	0.236134	6.46615	4.19408	0.207033	0.221583
SYT16	7.23622	5.42105	0.284171	7.24748	4.60823	0.160512	0.222341
PANX2	8.95215	6.54648	0.188721	8.79165	6.83074	0.256866	0.222794
FAM84B	12.6882	10.7501	0.26096	12.9521	10.5258	0.186044	0.223502
CAPN8	7.51533	5.60477	0.26599	7.52067	5.05797	0.181407	0.223698
LCP1	11.7315	9.56984	0.223496	11.5153	9.35906	0.224344	0.22392
SUCO	11.6389	9.76449	0.272733	11.6905	9.17684	0.175109	0.223921
CSRP1	12.5468	10.3497	0.218077	12.5026	10.3888	0.231029	0.224553
IFIT1	10.4243	8.50175	0.263794	10.3182	7.8986	0.186914	0.225354
CLDN1	13.0131	10.9608	0.241107	13.0291	10.7752	0.209657	0.225382
TMEM125	8.67966	6.86876	0.285013	8.68872	6.10602	0.166928	0.225971
CITED2	11.0738	8.87371	0.21763	11.299	9.21173	0.235319	0.226475
LARGE1	5.99476	3.73305	0.208526	5.63271	3.60805	0.245765	0.227145
FGFRL1	9.99427	7.79007	0.217005	9.97976	7.90471	0.237327	0.227166
MAFB	9.11366	6.89828	0.215331	9.13145	7.06788	0.239223	0.227277
MYOZ1	5.58142	3.73305	0.277707	5.59963	3.11789	0.179029	0.228368
MATN2	8.3085	6.40215	0.266767	8.38437	5.99397	0.19073	0.228749
LPCAT2	11.309	9.27182	0.243631	11.3176	9.09643	0.214464	0.229048
GGT6	8.64417	6.63121	0.247765	8.53612	6.28754	0.210432	0.229098
KIF5A	6.83403	4.95195	0.271294	6.78619	4.38032	0.188696	0.229995
SLC27A6	6.22905	4.24835	0.253368	6.46615	4.19408	0.207033	0.2302
IL6	6.3128	4.57362	0.299541	7.22657	4.60823	0.162855	0.231198
RHOF	8.7143	6.86876	0.278251	8.83705	6.39672	0.184241	0.231246
FGD3	6.22905	3.55451	0.156634	6.16739	4.46183	0.306603	0.231618
SELPLG	6.52036	4.39104	0.228566	6.82854	4.73762	0.234732	0.231649
WFS1	9.70773	7.53927	0.222447	9.3423	7.29007	0.241111	0.231779
NEURL1B	9.45365	7.62977	0.28246	9.37107	6.90611	0.181122	0.231791
MYD88	11.7732	9.67257	0.233162	11.6814	9.56583	0.230747	0.231954
EPHX4	8.96499	6.82841	0.227418	8.85754	6.77819	0.236622	0.23202
P2RY6	8.00063	6.21008	0.289062	7.97318	5.45872	0.175014	0.232038
INPP4B	11.6514	9.80253	0.277611	11.7014	9.28611	0.187466	0.232539
METRNL	7.22555	5.1742	0.241258	7.25782	5.10412	0.224736	0.232997
AMZ1	5.80358	3.55451	0.21036	6.05179	4.08474	0.255777	0.233068
WNT7B	10.4335	8.07396	0.194848	10.0732	8.19134	0.271336	0.233092
PHLDB2	12.5317	10.548	0.252835	12.5061	10.2779	0.213421	0.233128
FGF9	5.43591	3.11789	0.200543	5.02113	3.11789	0.267344	0.233943
CHST6	7.15984	5.33384	0.282044	7.32818	4.9083	0.186871	0.234458
PINK1	12.0992	9.97899	0.230009	11.862	9.80165	0.239753	0.234881
SORT1	11.5957	9.53909	0.240375	11.481	9.35906	0.229731	0.235053
UGT8	6.20731	4.08001	0.228886	6.33456	4.29168	0.242678	0.235782
MINDY1	10.293	8.28896	0.249304	10.1787	8.01051	0.222496	0.2359
NPTXR	7.30872	4.99184	0.2007	6.93569	5.05797	0.272114	0.236407
WIPF1	5.64867	3.73305	0.265058	5.38201	3.11789	0.208177	0.236618
MRAS	10.5435	8.38551	0.224063	10.3914	8.3873	0.249297	0.23668
ABCG2	6.5027	4.68033	0.282757	6.46615	4.08474	0.191922	0.23734
RFTN1	9.89714	8.00806	0.269979	9.85633	7.56969	0.204954	0.237466
PDE5A	7.51533	5.44889	0.238748	7.50341	5.42373	0.236567	0.237658
GPC4	7.83547	5.52909	0.202166	7.62008	5.7662	0.276646	0.239406
TMEM40	10.8645	8.82355	0.243008	10.8607	8.77841	0.236138	0.239573
ADGRF1	10.9796	9.14686	0.280721	10.8883	8.55977	0.199083	0.239902
TSPAN1	13.2143	11.1266	0.235263	13.2454	11.2258	0.24663	0.240946
TAGAP	6.29232	4.32228	0.255246	6.33456	4.19408	0.226804	0.241025
UBASH3B	10.4008	8.54884	0.277007	10.5392	8.25489	0.205288	0.241148
CLCN5	8.33348	6.40215	0.262188	8.26162	6.08432	0.221089	0.241639
PRSS8	12.0014	9.97325	0.245174	11.9301	9.8672	0.239341	0.242257
C6orf132	12.3574	10.4315	0.263168	12.3062	10.1372	0.222368	0.242768
STIM1	12.1688	10.1657	0.249453	12.0701	9.99286	0.236974	0.243213
CD177	5.68109	3.55451	0.229	5.0722	3.11789	0.258045	0.243522
CSF2	6.4667	4.77794	0.310193	7.1058	4.60823	0.177075	0.243634
NTNG1	5.94278	4.08001	0.274948	6.18941	3.959	0.213099	0.244024
ISPD	6.52036	4.51616	0.249273	6.60293	4.53749	0.238914	0.244093
RNF223	6.88925	4.95195	0.261106	6.93569	4.79727	0.227129	0.244118
SLC16A14	6.74697	5.03048	0.304289	6.88312	4.46183	0.18669	0.24549
ARHGAP42	8.84161	6.93673	0.267039	8.85414	6.69554	0.223974	0.245506
WNT5A	9.10498	7.03741	0.238561	8.81628	6.84358	0.254777	0.246669
EXPH5	9.14502	7.33193	0.284581	9.36393	7.11093	0.209786	0.247183
SLCO2A1	7.67258	5.69952	0.254712	7.9026	5.84637	0.240445	0.247578
MYO5B	12.726	10.7608	0.256117	12.5007	10.4516	0.241633	0.248875
MAL2	13.8035	12.0281	0.292101	14.0502	11.7752	0.206607	0.249354
SLC20A2	12.7229	10.712	0.248128	12.6061	10.6141	0.251396	0.249762
GPRC5B	7.91712	5.91114	0.248966	7.91569	5.92214	0.25112	0.250043
IL2RG	9.38605	7.48209	0.26721	9.22374	7.12149	0.232895	0.250053
POF1B	6.99367	5.03048	0.256462	6.82854	4.79727	0.244641	0.250551
C4orf19	7.92371	6.02411	0.268017	7.70554	5.62116	0.235798	0.251907
ANXA3	13.2684	11.3823	0.270539	13.3095	11.2166	0.234416	0.252478
SLC25A23	11.6238	9.50131	0.229645	11.4398	9.58115	0.27574	0.252692
VAT1	13.3619	11.2404	0.229815	13.1535	11.2948	0.275729	0.252772
GAD1	6.91608	4.99184	0.263479	7.27828	5.23335	0.242335	0.252907
SMPD1	10.9954	8.86878	0.228997	10.8239	8.97982	0.278533	0.253765
HIST1H4I	9.01215	7.13147	0.271556	9.10314	7.03472	0.23842	0.254988
DSC2	12.1259	10.3147	0.284954	12.2268	10.075	0.225031	0.254993
BCL2L1	12.8662	10.9107	0.257823	12.7638	10.7802	0.252862	0.255343
LGALSL	9.1922	7.31018	0.271305	9.52835	7.46594	0.239416	0.25536
CPEB4	10.7374	8.88843	0.277584	10.8161	8.71727	0.233452	0.255518
MMP2	11.8727	9.9744	0.268251	11.7772	9.74833	0.245039	0.256645
QSOX1	13.7567	11.8107	0.259547	13.6982	11.7213	0.254024	0.256785
ZNF185	11.9746	9.9938	0.253342	11.7946	9.85306	0.260338	0.25684
PXDC1	10.6104	8.62989	0.253397	10.5581	8.6204	0.261041	0.257219
LONRF3	5.99476	4.16813	0.281923	5.89907	3.80783	0.234679	0.258301
GPR27	6.39184	4.62824	0.294511	6.44809	4.29168	0.224314	0.259413
LEMD1	7.64088	5.87134	0.293303	7.72799	5.5902	0.227228	0.260265
CAP1	14.9672	13.0474	0.264293	14.9273	12.9667	0.256925	0.260609
ZNF431	11.0529	9.43604	0.326051	11.4403	9.09109	0.196248	0.26115
FRMD3	8.97137	7.18028	0.288954	8.66954	6.5773	0.234516	0.261735
SMIM14	12.2176	10.4222	0.288101	12.3625	10.2826	0.23653	0.262315
LYPD6B	6.70136	4.77794	0.263629	6.39246	4.46183	0.262315	0.262972
AGAP2	7.50655	5.58001	0.263059	7.34767	5.42373	0.263534	0.263297
PRRG1	10.0375	8.21692	0.283115	10.0863	8.04964	0.243735	0.263425
ZFHX2	8.38696	6.4159	0.255065	8.23576	6.36126	0.27272	0.263893
SLITRK6	8.23085	6.21008	0.246427	8.40308	6.5773	0.282089	0.264258
COBL	10.8166	9.01003	0.285873	10.8082	8.76839	0.243196	0.264534
LRRC37A3	7.09097	5.24042	0.277287	6.78619	4.79727	0.251929	0.264608
MDK	11.999	10.2219	0.29177	11.9333	9.86093	0.237772	0.264771
F3	14.7881	13.1714	0.32609	15.0502	12.7603	0.204486	0.265288
JUP	14.8529	12.8837	0.255391	14.7825	12.9227	0.275515	0.265453
BICC1	9.4003	7.46252	0.261019	9.44736	7.56197	0.270671	0.265845
SVIP	9.10498	7.24288	0.275075	9.06256	7.10028	0.256624	0.26585
CD274	8.48831	6.88851	0.329922	8.85414	6.54613	0.201939	0.265931
INA	4.98075	3.11789	0.274931	5.0722	3.11789	0.258045	0.266488
ATF3	10.3344	8.75562	0.334769	11.1923	8.85924	0.198468	0.266618
PCDHB16	6.5378	4.86808	0.314314	6.98639	4.79727	0.219286	0.2668
LLGL2	12.3571	10.5748	0.290713	12.3741	10.3333	0.243023	0.266868
GPR157	9.52691	7.61803	0.266299	9.67208	7.77724	0.268904	0.267601
UCHL1	7.05525	5.30343	0.296927	6.97388	4.9083	0.23889	0.267908
PLAUR	11.8812	10.1807	0.307672	12.0602	9.9314	0.228655	0.268163
TTC39A	6.90272	5.27231	0.322995	7.0827	4.85407	0.213361	0.268178
HIST1H3E	7.22555	5.69952	0.347232	7.45933	5.05797	0.189286	0.268259
PCDHA11	6.18522	4.16813	0.247056	6.16739	4.38032	0.28976	0.268408
CDYL2	8.62406	6.71118	0.265561	8.41234	6.53029	0.271298	0.268429
LSR	13.4673	11.5681	0.268098	13.429	11.5366	0.269352	0.268725
NCCRP1	10.7148	8.99878	0.304384	10.7131	8.61669	0.23384	0.269112
ITGB5	12.4743	10.5301	0.259873	12.3183	10.4775	0.279162	0.269518
HIST1H2BK	10.293	8.30368	0.251861	10.0422	8.2501	0.288748	0.270305
NTN4	12.7742	10.9815	0.288649	12.7957	10.8073	0.252018	0.270334
GPRIN1	9.5051	7.67013	0.280297	9.31047	7.37189	0.260873	0.270585
B3GNT7	8.75923	7.08948	0.314309	8.79165	6.65235	0.226989	0.270649
CCDC112	8.29839	6.59551	0.307174	8.55714	6.46508	0.234545	0.270859
PRR36	6.91608	5.1742	0.29898	7.13976	5.10412	0.243901	0.27144
ERBB3	11.5178	9.73359	0.290328	11.4816	9.51485	0.25583	0.273079
TCN2	8.51912	6.68879	0.2812	8.56547	6.65235	0.265517	0.273358
SLC4A8	6.41093	4.77794	0.322418	6.44809	4.29168	0.224314	0.273366
DAB2	10.6783	8.7952	0.271109	10.4677	8.61296	0.27648	0.273795
ARHGAP40	6.73192	5.24042	0.355642	7.11721	4.73762	0.192165	0.273903
DAPK1	10.9517	9.22235	0.301587	10.9244	8.90564	0.246777	0.274182
ACTBL2	6.83403	5.03048	0.28647	6.88312	4.96022	0.263725	0.275098
ZSCAN31	8.44771	6.46958	0.25382	8.19877	6.4483	0.297205	0.275513
THEMIS2	8.93267	7.37447	0.339574	8.93667	6.69554	0.211521	0.275548
USP53	11.4303	9.6454	0.290198	11.5366	9.59821	0.260907	0.275553
TSPAN15	7.97544	6.37425	0.329605	7.88273	5.71002	0.221794	0.2757
HIST1H2AE	6.5027	4.73016	0.292694	6.41125	4.46183	0.258921	0.275807
GLIPR2	8.18216	6.37425	0.285605	8.13863	6.22961	0.266272	0.275938
ROBO4	7.52405	5.98746	0.344701	7.50341	5.23335	0.207322	0.276011
AKAP12	9.88706	8.06966	0.283731	9.67977	7.78389	0.268711	0.276221
CLCF1	9.83556	8.18547	0.318619	10.1719	8.07696	0.234083	0.276351
NOS3	6.41093	4.91074	0.353505	6.61914	4.29168	0.199235	0.27637
EHD1	12.9864	11.1446	0.278984	12.8834	11.0156	0.273981	0.276482
FSTL1	12.8775	11.1639	0.304899	12.7982	10.7909	0.248753	0.276826
HS3ST1	7.54989	5.74454	0.28611	7.52067	5.62116	0.268036	0.277073
SPAG1	9.44451	7.60619	0.279647	9.39228	7.53067	0.275169	0.277408
MYCL	7.13725	5.10437	0.244367	6.99879	5.31284	0.310799	0.277583
LEPROT	12.059	10.2611	0.287588	12.1597	10.2578	0.267592	0.27759
PSD4	11.2804	9.41588	0.274604	11.1493	9.32077	0.281549	0.278076
FUT3	11.124	9.35715	0.293851	11.1686	9.23856	0.26243	0.278141
CST5	5.43591	3.73305	0.307177	5.12128	3.11789	0.249413	0.278295
MYPN	9.40501	7.40898	0.250688	8.98711	7.28068	0.306417	0.278553
CYB5R1	11.5496	9.58346	0.255936	11.5471	9.81629	0.301275	0.278606
HIST1H2BJ	6.90272	5.06797	0.280339	6.99879	5.14866	0.277368	0.278853
BACH2	8.53212	6.64292	0.269955	8.54457	6.75117	0.288493	0.279224
PEA15	13.34	11.5844	0.296142	13.2906	11.3707	0.264258	0.2802
SH3BGRL3	13.0244	11.1664	0.275856	12.9749	11.1661	0.285426	0.280641
ANO10	10.6889	8.7952	0.26911	10.5921	8.81777	0.292339	0.280724
LRRN1	5.64867	3.86853	0.291155	5.49523	3.60805	0.270335	0.280745
SORBS2	9.49407	7.90561	0.332525	9.56409	7.44929	0.230878	0.281701
NRIP3	6.76185	4.57362	0.21942	6.14502	4.60823	0.344651	0.282036
HIST1H3D	5.80358	3.98152	0.282816	5.78702	3.959	0.281652	0.282234
PCDH7	11.7207	9.76847	0.258421	11.4341	9.72609	0.306081	0.282251
CTGF	10.5826	8.87618	0.306423	11.0046	9.05311	0.258553	0.282488
GLIS3	7.22555	5.39261	0.280692	7.0827	5.2737	0.285389	0.283041
GLIPR1	9.68851	7.78483	0.26726	9.59694	7.85507	0.298982	0.283121
COL22A1	9.68657	8.10371	0.333818	9.89481	7.79051	0.232564	0.283191
CHIC2	9.5842	7.76368	0.283118	9.77075	7.9527	0.283604	0.283361
SEPT11	12.7719	11.0491	0.302968	12.715	10.7926	0.263805	0.283386
ERICH5	7.31879	5.74454	0.335817	7.636	5.52607	0.231658	0.283737
ABCB5	4.67075	3.11789	0.340835	5.25817	3.11789	0.226836	0.283836
SPRY2	8.86235	7.07233	0.289169	9.02382	7.18328	0.279217	0.284193
IGFL3	4.80456	3.11789	0.310644	5.0722	3.11789	0.258045	0.284344
RGL3	6.18522	4.51616	0.314457	6.5016	4.53749	0.256297	0.285377
FXYD5	13.186	11.3635	0.282745	13.1888	11.3931	0.288032	0.285389
MYL6	14.3073	12.4554	0.277017	14.2564	12.4896	0.293871	0.285444
PCDHB10	6.70136	4.77794	0.263629	6.55317	4.85407	0.307977	0.285803
TMSB4X	14.4843	12.7642	0.303519	14.5756	12.6769	0.26819	0.285854
TNC	12.3098	10.7044	0.328657	12.4375	10.4007	0.243698	0.286177
EYA2	6.13998	4.51616	0.324474	6.39246	4.38032	0.247905	0.286189
DNASE1L3	5.22826	3.98152	0.421397	5.84418	3.11789	0.151114	0.286256
FAM3C	12.4199	10.7595	0.316341	12.5524	10.5878	0.256208	0.286274
NATD1	9.70391	7.89105	0.284627	9.54318	7.75034	0.288604	0.286615
TMCC2	7.41574	5.47616	0.260692	7.05922	5.38779	0.313942	0.287317
PRR15	8.4749	6.70003	0.292219	8.33652	6.51427	0.282779	0.287499
RARRES2	5.13495	3.11789	0.247061	5.21414	3.60805	0.328489	0.287775
SMPDL3B	9.90716	8.07396	0.280642	9.67208	7.9108	0.294986	0.287814
DGKG	6.44836	4.39104	0.240263	6.42979	4.85407	0.335475	0.287869
IGSF3	12.062	10.2789	0.290553	12.09	10.2814	0.285473	0.288013
RIMS3	8.17112	6.67746	0.35511	8.63831	6.46508	0.221713	0.288412
SHISA4	8.59131	6.53395	0.240256	8.38437	6.81779	0.337607	0.288931
COL4A2	13.3048	11.5079	0.287784	13.1654	11.3844	0.290984	0.289384
USP54	10.2892	8.62404	0.31532	10.382	8.45962	0.263823	0.289571
PLEKHG1	9.35712	7.64721	0.305679	9.2652	7.39816	0.274134	0.289907
PPP1R9A	5.61546	4.08001	0.34497	5.69654	3.60805	0.235127	0.290049
GLCCI1	7.52405	5.94983	0.335825	7.55458	5.52607	0.245109	0.290467
NTAN1	6.73192	4.99184	0.299352	6.78619	4.96022	0.282053	0.290702
RPE65	9.5925	7.92954	0.315791	9.58061	7.67364	0.266651	0.291221
ZBTB38	11.8989	10.1677	0.301199	11.7478	9.91939	0.281565	0.291382
LURAP1L	8.8692	7.25052	0.325634	8.76299	6.80471	0.257336	0.291485
DGKB	4.73957	3.11789	0.324957	5.0722	3.11789	0.258045	0.291501
DYNLT3	9.793	8.27409	0.348949	10.228	8.13528	0.234441	0.291695
TMCC1	10.6753	9.07793	0.330473	10.679	8.6963	0.253017	0.291745
FBXL18	10.8377	9.07579	0.294861	10.7206	8.9298	0.289018	0.29194
TLN2	8.06769	6.40215	0.315226	7.79332	5.89734	0.268692	0.291959
TLR6	10.9412	9.40909	0.345774	11.1305	9.06407	0.238748	0.292261
CD4	5.74371	4.24835	0.354694	5.72737	3.60805	0.230156	0.292425
CAB39L	8.79562	7.02855	0.293803	8.78097	7.00078	0.291144	0.292474
MFAP3L	8.34827	6.77631	0.336353	8.33164	6.32488	0.248831	0.292592
KIAA1161	11.2013	9.46904	0.300982	11.1249	9.31161	0.284543	0.292763
HDAC9	10.2763	8.74218	0.34528	10.4088	8.35197	0.240342	0.292811
SYNGR2	11.8295	10.0274	0.286755	11.7651	10.0268	0.299729	0.293242
EXOC6	8.71049	7.14793	0.338549	8.76299	6.75117	0.247961	0.293255
BOC	5.91604	4.08001	0.280092	5.89907	4.19408	0.306723	0.293407
MMP15	10.0145	8.16948	0.278356	9.97039	8.27389	0.308534	0.293445
CPPED1	10.7825	9.18708	0.330916	10.8683	8.9026	0.256015	0.293466
TMEM133	7.2781	5.72221	0.34012	7.24748	5.23335	0.247564	0.293842
B3GNT2	9.98642	8.34695	0.320975	10.1121	8.20626	0.266869	0.293922
CCDC126	7.52405	5.91114	0.326939	7.4947	5.55852	0.261307	0.294123
CSGALNACT1	9.37887	7.80049	0.334859	9.37818	7.39816	0.253486	0.294172
GADD45B	11.0263	9.05638	0.255262	11.1256	9.54252	0.333772	0.294517
HSH2D	8.39648	6.9649	0.370726	8.44429	6.24918	0.218377	0.294551
ANXA9	8.53643	6.81814	0.303909	8.41695	6.6078	0.285359	0.294634
DGKI	5.18245	3.11789	0.239059	5.12128	3.60805	0.350326	0.294692
VCAN	7.91712	6.30199	0.326437	8.1934	6.26849	0.263357	0.294897
TMEM98	8.72943	7.11482	0.326553	8.73004	6.80471	0.26328	0.294917
TMEM62	9.59456	7.83639	0.295622	9.47192	7.70901	0.294653	0.295138
KRT18	15.0228	13.3829	0.320879	15.0496	13.1597	0.269825	0.295352
ASAH1	12.0661	10.3274	0.299631	12.0708	10.3012	0.293303	0.296467
TRAK2	10.5467	8.7094	0.279838	10.2757	8.60173	0.313395	0.296616
C14orf37	5.39692	4.08001	0.401394	5.49523	3.11789	0.192464	0.296929
MAGED1	11.9877	10.2316	0.296048	11.845	10.1005	0.298428	0.297238
IDS	11.3065	9.7605	0.342451	11.4887	9.50283	0.252456	0.297454
CLDN7	12.9042	11.2323	0.313837	12.9004	11.0736	0.281896	0.297866
PCDHB13	6.73192	4.99184	0.299352	6.71268	4.96022	0.296797	0.298074
PGPEP1	10.6685	9.02565	0.320228	10.7289	8.87798	0.27721	0.298719
WSB2	11.7207	10.0274	0.309228	11.6948	9.90879	0.289977	0.299603
STX3	10.9781	9.28114	0.308443	10.8982	9.12024	0.291586	0.300014
LATS2	10.5991	8.8663	0.300858	10.5381	8.79822	0.299392	0.300125
IDI1	10.9517	9.43938	0.350545	11.2534	9.25299	0.249927	0.300236
BAMBI	9.68269	8.16948	0.350331	9.80102	7.80366	0.250458	0.300395
RAB44	6.02004	4.39104	0.323313	6.75724	4.9083	0.277597	0.300455
DUSP10	10.4485	8.90541	0.343157	10.5147	8.55977	0.25794	0.300548
SH3RF1	10.1792	8.49856	0.311954	10.1554	8.36532	0.289153	0.300553
EPS8L1	10.6645	9.18311	0.358133	10.9179	8.88108	0.243704	0.300918
MFSD6	11.5124	9.78167	0.301303	11.4164	9.68234	0.300608	0.300955
PCDHGB3	6.81988	5.36355	0.364419	6.74254	4.67476	0.238526	0.301473
ABL2	11.3579	9.77112	0.332908	11.3914	9.50484	0.270442	0.301675
PPP2R5B	10.7551	9.01451	0.299248	10.7271	9.01128	0.304436	0.301842
PTPN21	9.97219	8.24006	0.301007	9.9014	8.18131	0.30353	0.302269
SPINK1	5.58142	3.86853	0.30505	5.69654	3.959	0.299882	0.302466
SERPINB10	5.3153	3.55451	0.295087	5.49523	3.80783	0.310486	0.302786
COL4A4	6.20731	4.45546	0.296922	6.07569	4.38032	0.308777	0.302849
MAN2A1	10.8006	9.28856	0.350623	10.9776	9.01128	0.255913	0.303268
ENDOD1	12.0598	10.2881	0.292881	11.9792	10.307	0.313788	0.303335
ZNF703	9.128	7.44268	0.310933	9.06256	7.30866	0.296499	0.303716
SEC14L1	12.3854	10.6587	0.302132	12.2509	10.5396	0.305386	0.303759
MB21D2	8.26761	6.5589	0.305933	8.37966	6.65235	0.302015	0.303974
MFSD6L	4.59751	3.11789	0.358585	5.12128	3.11789	0.249413	0.303999
CPT1A	11.6414	9.98926	0.318161	11.7113	9.9269	0.290301	0.304231
GCNT1	9.48964	7.82111	0.314576	9.44736	7.68789	0.295356	0.304966
TINF2	11.3779	9.53909	0.27956	11.265	9.66806	0.330588	0.305074
SP6	10.0129	8.43314	0.334529	10.0392	8.18131	0.275873	0.305201
TOM1L2	11.6504	9.93597	0.304723	11.555	9.84673	0.306028	0.305376
XAF1	6.25046	4.73016	0.348614	6.12229	4.19408	0.262755	0.305685
ACE2	6.79116	5.30343	0.356574	7.07101	5.10412	0.255805	0.306189
ITGB8	12.0368	10.6877	0.392553	12.3932	10.2093	0.220075	0.306314
IL32	12.0583	10.4597	0.330197	12.0266	10.2031	0.28253	0.306364
RIPK2	10.6043	9.00103	0.329135	10.7206	8.9026	0.283619	0.306377
PLEKHO1	7.06726	5.62909	0.369034	7.45933	5.42373	0.243907	0.30647
CCDC149	10.0405	8.39241	0.319066	10.0392	8.27389	0.294158	0.306612
DCBLD2	12.5818	11.1421	0.368628	12.7115	10.6832	0.245139	0.306884
PODXL	10.8899	9.2511	0.321114	10.9015	9.1307	0.293038	0.307076
ABCD1	9.61914	8.06535	0.340613	9.54107	7.67364	0.274061	0.307337
COL13A1	6.09323	4.57362	0.348779	6.44809	4.53749	0.265983	0.307381
ARSD	10.2398	8.34695	0.269269	9.97039	8.43872	0.345876	0.307573
PHYHIPL	5.03428	3.11789	0.264917	5.12128	3.60805	0.350326	0.307621
HTATIP2	11.3573	9.74845	0.327857	11.4072	9.60946	0.287634	0.307745
APLP1	8.0315	6.25679	0.292252	7.76465	6.14844	0.326191	0.309222
SSFA2	12.7027	11.1369	0.337807	12.6622	10.8292	0.280672	0.30924
AHNAK2	14.4516	12.4609	0.251617	14.0377	12.5932	0.367402	0.30951
SEZ6L2	9.22192	7.52676	0.30882	9.01473	7.32701	0.310417	0.309619
PLEKHA7	12.164	10.6393	0.347547	12.1835	10.3059	0.272123	0.309835
B4GALNT3	9.87521	8.35404	0.348404	9.87151	7.99341	0.272042	0.310223
TACSTD2	15.2383	13.6087	0.323172	15.2694	13.5207	0.297569	0.310371
TMEM217	7.8214	6.11172	0.305726	7.70554	6.03988	0.315199	0.310463
FAM114A1	13.4788	11.8331	0.319586	13.4206	11.6911	0.301566	0.310576
SMCO3	5.51064	4.16813	0.394335	5.25817	3.11789	0.226836	0.310586
TMC5	8.18765	6.5589	0.323366	7.91569	6.16918	0.298021	0.310694
PALLD	13.4103	11.729	0.311786	13.3039	11.6127	0.309662	0.310724
ACOT1	7.13725	5.52909	0.328016	7.22657	5.45872	0.293646	0.310831
CD59	15.3677	13.6808	0.310585	15.2966	13.6125	0.311201	0.310893
GREB1L	6.71672	5.1742	0.343284	6.69751	4.85407	0.278656	0.31097
RHOBTB3	10.066	8.59144	0.359833	10.1948	8.26442	0.262353	0.311093
STYK1	8.35316	6.72224	0.322883	8.4488	6.70966	0.299547	0.311215
HERC6	11.1326	9.52189	0.327449	10.9969	9.23856	0.295586	0.311518
DUSP3	11.7877	10.0548	0.300859	11.6495	10.0156	0.322213	0.311536
FUT6	6.33298	5.03048	0.405424	6.39246	4.19408	0.217882	0.311653
ADCY1	6.06926	4.16813	0.267734	5.8719	4.38032	0.355623	0.311678
MARCKSL1	11.2604	9.83959	0.373499	11.2796	9.27908	0.249914	0.311707
MAGI1	9.73984	8.00806	0.301082	9.60907	7.9761	0.322425	0.311753
MICALCL	7.54989	5.74454	0.28611	7.18382	5.62116	0.338526	0.312318
NUAK1	9.67295	7.90561	0.29375	9.6171	8.0218	0.330954	0.312352
APOE	8.01306	6.1286	0.270845	7.53772	6.03988	0.354082	0.312464
UPK2	8.08546	6.68879	0.379805	8.01636	5.99397	0.246151	0.312978
CLDN4	12.7936	11.3635	0.371108	12.9273	10.9551	0.254869	0.312988
TAF13	9.97695	8.555	0.373208	10.2655	8.28798	0.253927	0.313567
PCDHGA2	7.22555	5.50288	0.302988	6.93569	5.31284	0.324695	0.313842
BEND7	9.28727	7.62391	0.315702	9.2652	7.58501	0.312041	0.313872
ITM2C	10.933	9.15702	0.291987	10.7326	9.15907	0.335979	0.313983
ANKRD13A	12.0776	10.4514	0.323947	12.0446	10.3299	0.30466	0.314304
CRIM1	12.8561	11.1318	0.302642	12.6714	11.0559	0.326353	0.314497
VTCN1	8.70284	7.31747	0.382791	8.8267	6.80471	0.246218	0.314504
RND3	11.7681	10.2705	0.354125	11.9389	10.0818	0.276022	0.315074
RRAGD	5.80358	3.86853	0.261513	5.63271	4.19408	0.368919	0.315216
ALDH1A3	13.7388	12.1483	0.332059	13.7159	11.9715	0.298462	0.315261
PPARD	11.407	9.79083	0.326209	11.3523	9.64272	0.305747	0.315978
SLC8A1	5.35674	3.55451	0.286732	5.34201	3.80783	0.345276	0.316004
PLCD1	9.28983	7.69828	0.331816	9.24979	7.51476	0.300402	0.316109
FAM214B	11.1439	9.55762	0.333032	11.2195	9.48052	0.299574	0.316303
EFR3B	5.54649	3.55451	0.251394	5.34201	3.959	0.383419	0.317406
LMX1B	9.28727	7.50779	0.291287	9.07135	7.53067	0.343723	0.317505
ZBED2	10.7299	9.15702	0.336129	10.7363	8.99421	0.298932	0.317531
PTTG1IP	14.6827	12.9776	0.306689	14.4942	12.8886	0.328615	0.317652
EIF2AK3	10.1144	8.64152	0.360271	10.2617	8.40033	0.275222	0.317746
RAP1GAP2	11.106	9.49811	0.328079	11.1129	9.41574	0.308398	0.318239
DBNDD1	10.5961	8.81073	0.290111	10.4699	8.94172	0.346707	0.318409
SYNGR3	6.91608	5.36355	0.340913	6.89644	5.14866	0.29776	0.319336
SERPINB1	11.6121	10.1946	0.374341	11.7915	9.87344	0.264609	0.319475
PCDHB9	7.26774	5.1742	0.234305	7.07101	5.7662	0.404774	0.319539
CFL2	9.89882	8.42643	0.360386	10.0467	8.20626	0.27924	0.319813
IFNLR1	8.83463	7.05498	0.291254	8.74111	7.22304	0.349153	0.320204
STARD13	10.8386	9.27742	0.338885	10.6828	8.9565	0.302221	0.320553
WFDC12	6.33298	4.68033	0.318057	6.16739	4.53749	0.323111	0.320584
UBE2J1	11.6359	10.085	0.341283	11.6948	9.95806	0.30005	0.320667
KLF6	13.4721	12.0111	0.363246	13.9212	12.0813	0.279349	0.321298
MYO3B	5.18245	3.98152	0.434992	5.38201	3.11789	0.208177	0.321585
GRHL1	9.43301	8.12873	0.404923	9.72133	7.65199	0.238268	0.321596
LAMC2	16.9146	15.3349	0.334567	16.791	15.095	0.308644	0.321606
TCHHL1	5.18245	3.11789	0.239059	4.91223	3.60805	0.404952	0.322005
CARD11	10.1057	8.53019	0.335523	10.0212	8.3249	0.308577	0.32205
TSPAN17	11.9603	10.2789	0.311775	11.8209	10.2338	0.332826	0.322301
HAVCR2	5.13495	3.55451	0.334379	5.49523	3.80783	0.310486	0.322432
B3GALNT1	8.59957	6.94618	0.317894	8.64618	7.03472	0.327267	0.32258
GDF11	8.26241	6.70003	0.33859	8.32675	6.6228	0.306944	0.322767
UNC13B	10.6665	9.08646	0.33447	10.6042	8.92079	0.31134	0.322905
EPB41L5	9.74357	8.1735	0.336792	9.86983	8.18131	0.310245	0.323519
ORMDL2	9.95459	8.31462	0.320862	9.85463	8.24047	0.326656	0.323759
SPOCK2	7.07916	5.47616	0.32919	6.84238	5.1917	0.318491	0.323841
SNPH	8.68743	7.15608	0.345955	8.63436	6.90611	0.301817	0.323886
MPZL3	10.4032	8.93169	0.360605	10.5746	8.77841	0.287924	0.324265
SLIT2	8.23616	6.70003	0.344809	8.37966	6.66689	0.305075	0.324942
GATSL2	6.87564	5.1742	0.307478	6.89644	5.35085	0.342555	0.325017
ARHGAP30	7.47091	6.21008	0.417302	7.92219	5.82016	0.232931	0.325116
ELOVL4	8.88954	7.54548	0.39391	9.0208	7.05691	0.256337	0.325124
DUSP14	8.14877	6.33134	0.283727	8.02243	6.5773	0.36726	0.325494
CLIP4	11.385	9.92055	0.362362	11.4854	9.69297	0.288677	0.32552
PCDHB14	7.85632	6.31674	0.343986	7.6439	5.9465	0.308341	0.326164
2003-09-01	6.77658	5.27231	0.352508	6.69751	4.96022	0.299934	0.326221
CPEB2	7.37774	5.87134	0.351987	7.7501	6.01712	0.300829	0.326408
TMEM206	8.92612	7.40898	0.349377	9.04481	7.32701	0.304013	0.326695
NAGK	10.7689	9.2492	0.348762	10.9532	9.23856	0.304681	0.326721
SLC44A3	9.54626	7.99904	0.342169	9.33258	7.65199	0.311954	0.327062
RAB32	10.8481	9.17313	0.313171	10.7046	9.15395	0.341346	0.327258
LIPA	12.2491	10.6537	0.330928	12.3198	10.6921	0.323592	0.32726
ABLIM3	13.2202	11.5765	0.320034	13.045	11.4656	0.334618	0.327326
FOXD1	8.57464	7.08093	0.355098	8.80578	7.06788	0.299806	0.327452
BLZF1	10.4439	8.90541	0.344248	10.4249	8.74135	0.311314	0.327781
CPTP	10.6792	8.91981	0.295367	10.556	9.08304	0.360249	0.327808
KIF26A	5.3153	3.86853	0.366843	5.59963	3.80783	0.288812	0.327828
LIG4	9.25104	7.71491	0.344809	9.35196	7.66646	0.310895	0.327852
EZR	14.7714	13.2229	0.341873	14.7572	13.0882	0.314481	0.328177
ITGBL1	5.96901	4.45546	0.350248	5.665	3.959	0.30651	0.328379
KIAA1958	6.94241	5.58001	0.388935	7.17293	5.2737	0.268086	0.328511
AIF1L	9.5925	8.0995	0.355273	9.39462	7.66646	0.301836	0.328554
NR2F2	10.7689	9.29409	0.359784	10.8742	9.1333	0.29919	0.329487
PIEZO1	13.5489	11.9257	0.324607	13.4505	11.8718	0.33478	0.329694
FURIN	12.9361	11.2188	0.304105	12.8159	11.3236	0.355437	0.329771
POU2F3	6.27154	4.62824	0.320123	6.23243	4.67476	0.339698	0.32991
LRRN2	5.3153	3.73305	0.333962	5.42083	3.80783	0.326918	0.33044
CATSPER1	6.16279	4.16813	0.250928	5.665	4.38032	0.410463	0.330696
REPS2	8.41999	6.95557	0.362382	8.49312	6.76475	0.301792	0.332087
GPR37	6.9554	5.03048	0.263356	6.74254	5.42373	0.400866	0.332111
TACC1	12.1162	10.6551	0.363213	12.0546	10.3276	0.302078	0.332646
LSS	9.01215	7.40898	0.329153	9.13984	7.56969	0.336775	0.332964
PTHLH	7.43437	5.93062	0.352635	7.62008	5.9465	0.313474	0.333055
GJB4	8.9294	7.31018	0.325513	8.7666	7.2132	0.340706	0.333109
RAB11FIP1	12.2343	10.9028	0.397375	12.1624	10.2685	0.269069	0.333222
PLA2G7	5.18245	3.73305	0.366174	5.34201	3.60805	0.300626	0.3334
FAM171A2	7.03094	5.36355	0.314823	6.99879	5.49282	0.352094	0.333458
RAB30	7.25731	5.44889	0.285503	7.27828	5.89734	0.38397	0.334736
C2CD4C	6.73192	5.27231	0.36359	6.89644	5.1917	0.306777	0.335183
MAN2B2	10.5658	8.98058	0.333268	10.461	8.89341	0.337363	0.335315
GABARAPL1	11.187	9.59845	0.332511	11.1665	9.60385	0.338526	0.335518
CMPK2	8.84509	7.35336	0.355587	8.6304	6.96601	0.315477	0.335532
RASSF7	8.00686	6.70003	0.404208	8.70388	6.80471	0.268097	0.336153
GFI1	6.84803	5.44889	0.379154	6.96126	5.1917	0.293298	0.336226
MACROD2	5.96901	4.39104	0.334953	6.09918	4.53749	0.338754	0.336854
GPX3	9.04275	7.64142	0.378579	9.30302	7.54641	0.295942	0.33726
LMTK3	9.58003	8.16142	0.374073	9.66822	7.93489	0.300756	0.337414
FAXC	7.94333	6.4159	0.346894	7.92866	6.32488	0.329013	0.337954
SH3BP4	11.8159	10.0096	0.285928	11.4893	10.1307	0.389982	0.337955
PLA2G15	9.45137	7.84648	0.328762	9.35916	7.83601	0.347926	0.338344
FAM129B	14.5941	12.9897	0.328876	14.4345	12.9112	0.347879	0.338377
NPM2	6.81988	5.33384	0.35699	6.82854	5.1917	0.321561	0.339276
SLC43A2	5.74371	3.86853	0.272594	5.25817	3.959	0.406361	0.339478
PRR15L	8.37738	7.00162	0.385347	8.26162	6.49806	0.29452	0.339934
RP11-2C24.9	7.62476	6.30199	0.399768	8.00416	6.16918	0.280295	0.340032
CD163L1	5.64867	4.45546	0.437327	6.23243	4.19408	0.243442	0.340384
TUBA4A	12.4619	11.0171	0.367357	12.4302	10.7593	0.314066	0.340712
INSIG1	10.1372	8.70109	0.369553	10.2552	8.57517	0.312066	0.34081
KRT6B	11.7497	10.2335	0.349603	11.7638	10.1731	0.332019	0.340811
TEAD1	12.4074	10.9415	0.362032	12.2761	10.6354	0.320691	0.341362
GRIN1	5.96901	4.16813	0.287	5.53094	4.19408	0.395882	0.341441
NOCT	9.3	7.83132	0.361313	9.47413	7.84239	0.322699	0.342006
CD9	12.8516	11.3609	0.355844	12.9242	11.319	0.32869	0.342267
LRRC8A	12.6186	11.1225	0.354511	12.4994	10.9011	0.330282	0.342396
ITGB6	13.2346	11.9192	0.401791	13.3924	11.5715	0.283058	0.342424
EMP1	14.1145	12.7513	0.388723	14.2969	12.5434	0.296585	0.342654
TIAM2	7.56687	5.94983	0.326003	7.57949	6.10602	0.360115	0.343059
CCDC107	7.60023	6.27202	0.39826	7.69038	5.89734	0.288564	0.343412
KISS1	5.13495	3.11789	0.247061	4.79266	3.60805	0.439946	0.343503
ADAM9	13.3281	11.865	0.362715	13.2191	11.5967	0.324804	0.34376
AIFM2	9.55478	8.06535	0.356152	9.58471	7.99341	0.331872	0.344012
PROC	6.06926	3.98152	0.235248	5.8159	4.67476	0.4534	0.344324
HMGCS1	11.5802	10.1995	0.384039	11.7781	10.0682	0.305676	0.344857
DDX60L	10.2425	9.00554	0.424274	10.5006	8.59041	0.266051	0.345163
SMIM24	6.25046	4.51616	0.300555	6.21108	4.85407	0.390388	0.345472
MSX2	8.103	6.53395	0.33703	8.10475	6.6078	0.354302	0.345666
IRF7	6.42977	4.82386	0.328528	6.31472	4.85407	0.363329	0.345928
TNFRSF21	11.8736	10.4621	0.375927	11.8425	10.1919	0.318521	0.347224
ANKRD9	9.80197	8.12044	0.31175	9.67785	8.29265	0.382837	0.347293
HSD3B7	6.99367	5.30343	0.309877	6.65101	5.2737	0.384938	0.347407
ABCA12	11.3365	9.69785	0.321162	11.0084	9.59065	0.374295	0.347729
C3orf52	8.54928	7.18826	0.389306	8.83705	7.13197	0.306704	0.348005
SP110	10.8095	9.33584	0.36007	10.795	9.22154	0.336004	0.348037
SPTBN5	6.41093	5.27231	0.454192	7.31834	5.2737	0.242384	0.348288
GDA	10.3997	9.05203	0.392936	10.4007	8.68215	0.303854	0.348395
SCN3B	7.61663	6.16176	0.364788	7.65175	6.06228	0.332293	0.348541
FAM84A	10.9525	9.58798	0.38836	10.9195	9.22399	0.308744	0.348552
OSGIN2	10.2647	8.77422	0.355894	10.2921	8.74476	0.342148	0.349021
TNIK	7.63284	6.04208	0.331996	7.51206	6.06228	0.366076	0.349036
ZDHHC2	8.97137	7.58221	0.381788	8.87103	7.2132	0.316916	0.349352
USP2	6.62193	5.39261	0.426519	6.88312	5.01005	0.272993	0.349756
MCOLN1	10.0897	8.44646	0.320143	9.94191	8.54421	0.379533	0.349838
RNASE1	7.19307	5.74454	0.366392	6.89644	5.31284	0.333649	0.350021
ERP27	5.13495	3.86853	0.41569	5.42083	3.60805	0.284643	0.350166
B3GNT3	11.1396	9.54374	0.330816	10.934	9.4988	0.369786	0.350301
TLE2	8.99972	7.13147	0.273904	8.71889	7.49056	0.426812	0.350358
MMP17	9.55265	8.1775	0.385511	9.65853	7.99341	0.315318	0.350414
SMURF2	11.3664	10.0329	0.396813	11.5571	9.84197	0.304578	0.350696
GLRB	7.15984	5.89138	0.415102	7.22657	5.42373	0.286609	0.350856
PLPPR2	10.4289	8.72315	0.306559	10.1664	8.82745	0.395306	0.350933
ST3GAL1	11.5075	10.0461	0.36316	11.5498	9.98855	0.338867	0.351013
SLC28A3	7.74892	6.14528	0.329046	7.57124	6.14844	0.372989	0.351017
CXorf49	6.06926	4.45546	0.326736	5.02113	3.60805	0.375511	0.351124
KIF1C	14.3433	12.7497	0.331338	14.0815	12.6538	0.371727	0.351533
PCYT2	10.2306	8.57029	0.316381	10.06	8.68924	0.386689	0.351535
DDA1	11.4595	9.91816	0.343566	11.4409	9.96684	0.359966	0.351766
TLR1	10.6966	9.47067	0.427509	10.8091	8.95355	0.276332	0.35192
MFSD9	8.67966	6.99252	0.310543	8.66954	7.32701	0.394329	0.352436
ZNF165	7.49773	6.16176	0.396127	7.77906	6.08432	0.308911	0.352519
KLK10	13.3166	12.0385	0.412355	13.3836	11.6136	0.293216	0.352785
MSRB3	8.38218	6.99252	0.381656	8.36064	6.73747	0.32462	0.353138
SERPINE2	9.62724	8.36461	0.416784	9.70258	7.91686	0.29003	0.353407
CMTM4	11.0826	9.72132	0.389229	11.1651	9.51685	0.319018	0.354124
TNFRSF12A	12.4548	11.0082	0.366884	12.5183	10.9697	0.341856	0.35437
SCRN1	12.3828	10.9309	0.365559	12.2163	10.6743	0.343417	0.354488
NHLRC1	5.4738	3.55451	0.264386	5.45855	4.29168	0.445386	0.354886
PBXIP1	11.4134	9.832	0.334154	11.263	9.85148	0.375906	0.35503
DYRK2	9.71725	8.29265	0.372524	9.83583	8.26917	0.337588	0.355056
SCAMP2	12.3816	10.8022	0.33463	12.1916	10.7794	0.375723	0.355176
MYO1D	12.8994	11.3352	0.338164	12.6733	11.2476	0.372232	0.355198
PPP1R15A	11.4635	9.94772	0.349717	11.7391	10.2732	0.362004	0.355861
FIBCD1	6.33298	4.77794	0.340319	6.48399	5.05797	0.372156	0.356238
YIPF1	10.1201	8.50812	0.327144	9.86815	8.49243	0.385361	0.356253
HCN2	7.35836	5.67645	0.311669	6.99879	5.68104	0.401161	0.356415
TOM1	10.7652	9.22429	0.343663	10.6411	9.20432	0.369389	0.356526
NF2	11.8863	10.3699	0.349559	11.7529	10.2931	0.36356	0.356559
IRX6	5.71276	4.39104	0.400059	5.63271	3.959	0.313448	0.356753
RAB5B	12.773	11.3012	0.360536	12.7111	11.2111	0.353562	0.357049
EMC10	11.6794	10.2015	0.359	11.7234	10.2313	0.355496	0.357248
PLCXD2	7.51533	6.30199	0.431271	7.69038	5.87209	0.283558	0.357414
INHBA	12.1288	10.8599	0.414998	12.3284	10.5925	0.300229	0.357613
CAMK2N1	12.5664	11.1729	0.380655	12.7272	11.1533	0.335914	0.358284
PIM1	10.3806	9.0212	0.389739	10.7637	9.15395	0.327657	0.358698
PHTF1	8.77754	7.51414	0.416561	8.94307	7.2132	0.301479	0.35902
ZNF69	6.5378	5.27231	0.415958	6.519	4.79727	0.303185	0.359572
RAB11FIP5	12.2102	10.5793	0.322892	11.8386	10.5048	0.396728	0.35981
TMEM45A	9.11654	7.67581	0.368381	9.15094	7.6447	0.352027	0.360204
UGCG	11.5802	10.3488	0.42591	11.9276	10.1655	0.294807	0.360358
PRSS22	6.99367	5.69952	0.407778	6.94853	5.2737	0.313203	0.360491
TRNP1	11.2467	9.74576	0.353328	11.1943	9.75172	0.367916	0.360622
YPEL1	5.64867	4.08001	0.33712	5.45855	4.08474	0.385872	0.361496
ST6GALNAC1	6.74697	5.58001	0.445361	6.85609	5.01005	0.278156	0.361758
GCA	7.74146	6.4159	0.398993	7.77187	6.14844	0.324562	0.361778
TMBIM1	13.9994	12.4734	0.347231	13.9109	12.5035	0.376984	0.362108
MAST1	6.09323	4.62824	0.362237	6.37343	4.9083	0.362204	0.362221
HEG1	10.8245	9.34298	0.358102	10.589	9.14108	0.36655	0.362326
PCDH1	13.5696	12.0336	0.344843	13.3557	11.9613	0.380411	0.362627
TPGS2	11.5448	10.0318	0.350391	11.3879	9.97266	0.374939	0.362665
PADI2	11.9535	10.5996	0.391238	11.7597	10.1781	0.334125	0.362682
ATXN1	10.2385	8.7978	0.368385	10.0437	8.55977	0.357513	0.362949
C11orf88	5.35674	4.16813	0.438726	5.75752	3.959	0.28747	0.363098
AKTIP	9.77489	8.38897	0.382645	9.87151	8.33398	0.344475	0.36356
HAP1	6.84803	5.7665	0.472526	7.43222	5.45872	0.254635	0.363581
PCDHGB1	6.22905	4.68033	0.341815	6.16739	4.79727	0.38686	0.364337
SPINT1	13.4216	11.9973	0.372601	13.4536	11.966	0.356611	0.364606
TGFBR1	9.59456	8.30001	0.407663	9.6836	8.04964	0.322204	0.364934
RTN2	9.25366	7.62391	0.323145	8.94945	7.65199	0.406841	0.364993
CDK5R1	8.87261	7.62391	0.420829	9.12583	7.43245	0.309201	0.365015
RASGRF2	5.35674	3.55451	0.286732	5.25817	4.08474	0.443367	0.365049
SKIL	9.73235	8.67303	0.47986	9.99062	7.99341	0.250484	0.365172
CDH1	14.1021	12.7138	0.382006	14.0932	12.5729	0.348626	0.365316
SLC25A25	8.83463	7.51414	0.400399	9.08589	7.49056	0.330946	0.365672
GSKIP	9.60485	8.28154	0.399617	9.82721	8.23563	0.331809	0.365713
IRGQ	10.0601	8.66735	0.380849	10.2833	8.77174	0.35074	0.365794
ATP6V0E2	8.87941	7.4756	0.377931	8.7114	7.2132	0.353994	0.365962
ATP6V0A1	11.4216	10.0318	0.381633	11.3661	9.85621	0.351147	0.36639
STX19	6.1168	4.91074	0.433448	6.27418	4.53749	0.300059	0.366753
FAM109A	9.18946	7.68146	0.351596	9.17833	7.79051	0.382142	0.366869
MAP1S	10.1401	8.68151	0.363856	10.057	8.62411	0.370377	0.367116
FRY	7.50655	5.69952	0.285778	7.1509	5.99397	0.448466	0.367122
CKB	7.69591	6.28708	0.376618	7.53772	6.06228	0.359622	0.36812
RAB3B	5.43591	4.32228	0.462129	5.95187	4.08474	0.274119	0.368124
C12orf49	10.8662	9.33226	0.345335	10.7772	9.42426	0.391496	0.368416
SLC25A4	9.51168	8.08678	0.372447	9.52195	8.06609	0.364538	0.368492
ACP2	10.9428	9.41079	0.345792	10.8117	9.45994	0.391813	0.368803
ADGRF4	9.4695	8.20128	0.41517	9.54948	7.91686	0.322501	0.368835
C11orf91	6.48481	5.39261	0.469045	6.85609	4.96022	0.268713	0.368879
SLC46A3	8.65213	7.44268	0.432432	8.7881	7.07876	0.3058	0.369116
KLHL31	6.77658	4.95195	0.282314	6.48399	5.35085	0.455923	0.369119
EFEMP1	11.8092	10.4382	0.38661	11.6656	10.1591	0.351975	0.369292
TDRKH	7.77105	6.34579	0.372353	7.896	6.4483	0.366604	0.369478
CYTH3	11.0551	9.65117	0.37789	11.0038	9.53467	0.361196	0.369543
IL23A	6.90272	5.60477	0.406703	6.97388	5.38779	0.333073	0.369888
USP18	7.96268	6.61941	0.394126	7.8004	6.26849	0.345821	0.369973
NKX1-2	7.40633	6.09463	0.402845	7.0943	5.52607	0.337223	0.370034
SLC31A2	7.76371	6.14528	0.325689	7.45933	6.18961	0.41474	0.370215
METRNL	5.08562	3.55451	0.346012	5.30076	3.959	0.39454	0.370276
FAM25A	5.13495	3.55451	0.334379	5.25817	3.959	0.406361	0.37037
WNT16	5.08562	3.98152	0.465192	5.8159	3.959	0.27607	0.370631
C11orf63	9.04578	7.64142	0.377786	8.93346	7.4742	0.363679	0.370732
FAM177A1	10.4576	8.99651	0.363224	10.5082	9.10706	0.378629	0.370927
ARRDC4	11.073	9.85715	0.430511	11.1417	9.46201	0.312155	0.371333
CDC34	11.2804	9.76316	0.349342	11.1936	9.84832	0.393577	0.371459
HABP4	8.00063	6.34579	0.317574	7.84899	6.6228	0.427444	0.372509
ATP6V0C	8.98404	7.61803	0.387962	8.90094	7.41541	0.357117	0.37254
SLC36A1	10.1144	8.6702	0.367502	9.97976	8.57517	0.377725	0.372614
CYLD	12.1195	10.7562	0.38869	12.1281	10.6445	0.357604	0.373147
SH3BGRL2	9.98485	8.6702	0.402022	9.98443	8.45129	0.345526	0.373774
MVB12B	8.07956	6.73322	0.393289	8.11613	6.6228	0.355192	0.374241
KLF12	7.56687	6.19416	0.386164	7.38586	5.92214	0.362556	0.37436
KRT75	4.9248	3.55451	0.386813	5.0722	3.60805	0.36245	0.374632
TEC	8.7739	7.52046	0.419449	9.03884	7.4409	0.330347	0.374898
AKAP2	7.06726	5.69952	0.387498	6.81456	5.35085	0.36256	0.375029
ITGA2	13.3445	12.0435	0.405844	13.4381	11.903	0.345055	0.37545
ECE1	12.6812	11.1548	0.347143	12.5064	11.1981	0.403796	0.37547
RABIF	8.92283	7.436	0.356795	8.85754	7.52274	0.396448	0.376621
S1PR1	6.99367	5.52909	0.362342	6.74254	5.38779	0.391004	0.376673
MVD	11.098	9.68807	0.376329	11.1361	9.72954	0.377209	0.376769
ATOX1	11.3682	9.97325	0.38025	11.4381	10.0184	0.373801	0.377025
FAM171A1	10.2132	8.70109	0.350603	9.98443	8.67502	0.403486	0.377045
CD7	5.71276	4.45546	0.418326	5.38201	3.80783	0.335835	0.377081
PCDHA4	6.39184	4.91074	0.358213	6.29459	4.96022	0.396566	0.377389
PSEN2	9.26409	7.76899	0.354758	9.12302	7.80366	0.400713	0.377735
MUC1	13.4646	12.098	0.387811	13.3061	11.8632	0.367835	0.377823
SNX24	10.377	8.96215	0.375042	10.418	9.02536	0.380859	0.377951
ERCC6	10.0999	8.69273	0.377052	9.93871	8.54029	0.379344	0.378198
OSGIN1	8.13746	6.49568	0.320461	7.9026	6.70966	0.437411	0.378936
RAPGEF2	10.3818	9.13045	0.420049	10.4721	8.91172	0.33905	0.379549
IL17RD	8.67576	7.27318	0.378254	8.61444	7.22304	0.381195	0.379724
MEX3A	7.61663	6.31674	0.406159	7.69038	6.18961	0.353365	0.379762
CDKN1A	14.5845	13.2187	0.388009	14.5207	13.0944	0.372071	0.38004
EBP	11.0233	9.64829	0.38556	10.9954	9.57925	0.374717	0.380138
SLC25A30	8.56202	7.14793	0.375246	8.56961	7.19332	0.385207	0.380226
SPSB1	9.26927	7.86646	0.378192	9.3687	7.98189	0.382411	0.380302
OLFML3	6.18522	4.73016	0.364739	5.8719	4.53749	0.396554	0.380647
TICAM1	11.2875	9.94655	0.394763	11.2688	9.82114	0.366621	0.380692
DOPEY2	9.6788	8.38205	0.407041	9.78685	8.29265	0.354978	0.381009
TNFAIP1	12.1744	10.8196	0.390987	12.207	10.7769	0.371099	0.381043
KCNMB4	5.99476	4.82386	0.444144	5.84418	4.19408	0.318617	0.381381
ARHGEF28	11.1425	9.84337	0.406379	11.1929	9.70875	0.357452	0.381915
NECTIN2	11.6369	10.219	0.374257	11.5829	10.2252	0.390206	0.382232
UPK1B	4.86618	3.86853	0.500817	5.53094	3.60805	0.263727	0.382272
SETD7	12.3866	11.0551	0.397345	12.3403	10.895	0.367232	0.382288
KALRN	6.3128	5.27231	0.486163	6.519	4.67476	0.278501	0.382332
NTN1	7.59196	6.28708	0.404755	7.46825	5.99397	0.359913	0.382334
SSPN	6.13998	4.99184	0.451205	6.21108	4.53749	0.313472	0.382338
SERPINI1	6.4667	4.95195	0.349958	6.27418	5.01005	0.416352	0.383155
PLEKHN1	9.55053	8.13286	0.374316	9.56824	8.22102	0.393049	0.383682
VSIG10	9.73984	8.42643	0.40237	9.79218	8.3385	0.365089	0.38373
NSUN7	5.74371	4.39104	0.391568	5.8719	4.46183	0.376294	0.383931
ATP13A2	12.123	10.7421	0.383954	11.9923	10.6113	0.383947	0.383951
HAGH	10.2078	8.82355	0.383092	10.3083	8.93279	0.385423	0.384258
KIFC3	10.7177	9.40739	0.403245	10.6742	9.22154	0.365351	0.384298
TNFSF18	5.08562	3.73305	0.391595	5.21414	3.80783	0.377277	0.384436
ATP6AP1	11.9081	10.4146	0.355166	11.8069	10.5347	0.414006	0.384586
SPRR2D	9.25627	7.83639	0.373743	9.25495	7.91686	0.395544	0.384643
RGS20	9.33504	8.07825	0.418475	9.27792	7.77056	0.351755	0.385115
ZNF426	10.123	8.81073	0.402691	10.0935	8.64979	0.367629	0.38516
ZHX2	9.37887	7.99451	0.383061	9.33258	7.96445	0.387392	0.385226
ELOVL7	9.15346	7.99451	0.447839	9.42238	7.79051	0.322671	0.385255
KIAA1211L	10.5795	9.13045	0.366274	10.4215	9.11499	0.404303	0.385288
SUSD4	6.1168	4.77794	0.395331	6.21108	4.79727	0.375319	0.385325
PLEC	16.7938	15.2911	0.352899	16.5814	15.3236	0.418169	0.385534
PPP2R3A	10.2332	9.00329	0.426339	10.2148	8.68215	0.345637	0.385988
TUBB4B	12.9658	11.6699	0.40729	12.9127	11.4589	0.36506	0.386175
HELZ2	11.455	10.1817	0.413722	11.3009	9.82275	0.358948	0.386335
HOXB2	7.2468	6.24139	0.498127	7.7354	5.87209	0.274845	0.386486
C15orf48	10.3381	9.33046	0.497365	10.3914	8.53242	0.275678	0.386522
SPHK1	9.1422	7.80049	0.394553	9.02382	7.6226	0.37861	0.386582
EPCAM	11.9143	10.7833	0.456603	12.0187	10.3602	0.316763	0.386683
EML5	5.43591	4.24835	0.439045	5.665	4.08474	0.334423	0.386734
ATMIN	11.3178	9.96054	0.390315	11.2681	9.88583	0.383604	0.38696
ATP6V0E1	12.6972	11.2504	0.366852	12.6076	11.311	0.407089	0.38697
ME3	8.39173	6.9649	0.371948	8.29205	6.97769	0.402104	0.387026
HACD2	12.286	11.0659	0.429258	12.3628	10.8276	0.345015	0.387137
ANXA2	16.7229	15.3991	0.399489	16.671	15.257	0.37528	0.387384
PLPP4	5.35674	3.98152	0.385493	5.16855	3.80783	0.389388	0.387441
UNC5A	6.25046	4.95195	0.406548	5.97753	4.53749	0.368558	0.387553
CACNB3	10.3794	9.10338	0.412925	10.4238	8.95943	0.362402	0.387664
TRIM2	10.2582	9.09495	0.446504	10.3218	8.71727	0.328832	0.387668
WBP1L	11.1516	9.74576	0.377392	10.9892	9.66267	0.398725	0.388058
PCDHAC1	6.22905	4.86808	0.389321	5.97753	4.60823	0.38708	0.3882
TM7SF2	8.42465	6.90799	0.349496	8.14421	6.91829	0.427526	0.388511
RORA	6.13998	4.86808	0.414112	6.31472	4.85407	0.363329	0.38872
GSN	13.3879	11.9882	0.379018	13.2647	11.9395	0.399105	0.389062
FAT4	7.77835	6.40215	0.385233	7.45035	6.10602	0.393838	0.389535
RHOD	12.8747	11.3508	0.347727	12.7134	11.5013	0.431628	0.389678
DPH3	9.74357	8.43982	0.405072	9.73799	8.32033	0.37432	0.389696
MAPK13	11.2108	9.87572	0.396383	11.0907	9.71224	0.384628	0.390506
NSG1	9.30253	7.88617	0.374656	9.24979	7.9527	0.406944	0.3908
USP43	9.40737	8.09527	0.402735	9.57031	8.17121	0.379165	0.39095
MPP5	10.6616	9.48688	0.442971	10.859	9.30007	0.3394	0.391185
FZD7	7.55841	6.3601	0.435785	7.75739	6.22961	0.346809	0.391297
DOCK8	8.74068	7.39527	0.393545	8.54457	7.18328	0.389235	0.39139
FAM46B	9.95137	8.44314	0.351543	9.76534	8.55201	0.431273	0.391408
SECISBP2L	10.9749	9.68105	0.407861	10.8599	9.44954	0.376228	0.392045
CLTB	14.1984	12.6857	0.350454	14.0444	12.8393	0.433721	0.392087
MYRFL	5.39692	4.24835	0.451074	5.8719	4.29168	0.33443	0.392752
BMPR2	11.3259	10.1155	0.432138	11.2915	9.79509	0.354426	0.393282
POLR2A	5.39692	3.86853	0.346666	4.79266	3.60805	0.439946	0.393306
RAD23B	13.2964	12.0435	0.419595	13.354	11.908	0.367027	0.393311
MFSD1	11.0286	9.74711	0.411364	11.0726	9.66267	0.376337	0.39385
RAB9A	10.1709	8.83372	0.395804	10.1064	8.75494	0.391906	0.393855
ALOX5AP	5.68109	4.16813	0.350391	5.72737	4.53749	0.438341	0.394366
RNF11	11.2734	10.0439	0.426485	11.4318	9.9683	0.362603	0.394544
PLEKHB1	6.25046	4.86808	0.383586	6.09918	4.79727	0.405589	0.394588
BTG1	12.2269	10.9089	0.401064	12.2444	10.8796	0.388291	0.394678
LRRC8B	8.07364	6.78689	0.409873	8.09327	6.69554	0.379527	0.3947
KAT2B	8.64815	7.34625	0.405592	8.73374	7.35411	0.384317	0.394954
RNF19A	10.5089	9.38854	0.459982	10.7482	9.14882	0.330008	0.394995
HIST1H2BF	4.73957	3.73305	0.497747	5.38201	3.60805	0.292406	0.395077
ELL2	11.5623	10.2751	0.409748	11.5555	10.1642	0.381219	0.395484
LARP6	9.6651	8.3505	0.402038	9.56824	8.20626	0.389047	0.395542
LRRC2	4.86618	3.73305	0.455928	5.38201	3.80783	0.335835	0.395881
PCDHA1	5.64867	4.16813	0.358354	5.49523	4.29168	0.434204	0.396279
TMEM158	5.74371	4.16813	0.335509	5.665	4.53749	0.457707	0.396608
CCNG2	10.5784	9.4788	0.466642	10.9268	9.31619	0.327463	0.397052
PERM1	7.78562	6.19416	0.331835	7.72055	6.6078	0.462411	0.397123
CDKL5	8.71049	7.44932	0.417206	8.69632	7.29007	0.37729	0.397248
SPTSSB	5.88877	4.57362	0.401884	5.72737	4.38032	0.393096	0.39749
FNBP1L	10.9899	9.77508	0.430831	11.1235	9.66985	0.365103	0.397967
SYDE2	7.03094	5.7665	0.416262	7.16196	5.7662	0.380044	0.398153
NXPE2	4.98075	3.73305	0.42112	5.02113	3.60805	0.375511	0.398316
ERRFI1	12.7567	11.535	0.428766	12.9092	11.4677	0.368175	0.398471
ACOT4	7.37774	6.17805	0.435369	7.25782	5.79345	0.362393	0.398881
AAMDC	7.87006	6.40215	0.361508	7.77187	6.5773	0.436916	0.399212
MEGF9	10.1983	8.90782	0.408813	10.2069	8.85293	0.391225	0.400019
RAB3IP	10.0206	8.88843	0.456215	10.1177	8.579	0.34419	0.400202
FAM228B	7.07916	5.851	0.42686	7.33796	5.92214	0.374797	0.400828
ACTR1A	12.4519	11.0958	0.390633	12.3305	11.0511	0.411952	0.401292
MAPRE2	9.36441	8.0995	0.416126	9.42008	8.04964	0.386773	0.401449
MYL2	5.4738	4.32228	0.450152	5.69654	4.19408	0.352951	0.401552
BICDL2	10.3528	9.13662	0.430419	10.4306	9.00845	0.373152	0.401786
BRF2	7.53271	6.37425	0.447991	7.77906	6.28754	0.355639	0.401815
RABEP2	9.81975	8.52392	0.407301	9.81155	8.48021	0.3974	0.40235
ARHGAP29	12.6914	11.6005	0.469473	12.7561	11.1794	0.335245	0.402359
STARD10	11.4567	10.0318	0.372466	11.2143	10.0043	0.432274	0.40237
GFOD1	10.0021	8.85885	0.452745	10.1499	8.64615	0.352636	0.402691
FLVCR2	6.41093	4.73016	0.311915	5.8719	4.85407	0.493856	0.402886
FMN1	7.03094	5.55479	0.359448	6.58654	5.42373	0.446642	0.403045
RAB43	7.33871	6.05982	0.412111	7.61206	6.26849	0.394046	0.403079
CYP27C1	7.05525	5.83036	0.427828	7.34767	5.9465	0.378622	0.403225
ACOX1	11.0078	9.80512	0.434455	11.0549	9.62988	0.3724	0.403428
FARP1	10.9042	9.51717	0.382358	10.6213	9.3855	0.42461	0.403484
TJP2	13.1515	11.8207	0.397548	13.0627	11.7756	0.409757	0.403653
SOX9	11.4725	10.429	0.485142	11.7122	10.0818	0.322984	0.404063
ZDHHC13	10.7081	9.60292	0.46483	10.8325	9.29078	0.343465	0.404148
SC5D	10.7943	9.62505	0.444658	11.0168	9.56004	0.364317	0.404487
FLNB	16.6465	15.4007	0.421677	16.4804	15.1131	0.387608	0.404643
SERPINE1	15.3552	14.299	0.480899	15.4901	13.8846	0.328606	0.404752
FBXO6	7.68818	6.33134	0.390438	7.52067	6.26849	0.419815	0.405127
HIST1H2BN	6.18522	4.86808	0.401329	6.02747	4.73762	0.408994	0.405161
CEP295NL	5.08562	3.73305	0.391595	5.21414	3.959	0.418955	0.405275
PAFAH2	9.94976	8.65593	0.407868	9.93229	8.6204	0.402793	0.40533
FAM155A	5.4738	4.16813	0.404535	5.25817	3.959	0.406361	0.405448
SLC27A4	10.8983	9.35008	0.341925	10.6876	9.59632	0.469348	0.405636
BNIP3L	11.04	9.8358	0.433998	11.1319	9.72609	0.377406	0.405702
ZHX3	10.4243	9.12632	0.406703	10.312	9.00845	0.405132	0.405917
RALBP1	12.4359	11.0138	0.373166	12.279	11.0924	0.439361	0.406264
MAPK8IP2	8.76291	7.16419	0.330172	8.34138	7.29007	0.482531	0.406351
DCBLD1	9.88369	8.68432	0.435467	9.92099	8.51656	0.377768	0.406617
SOCS6	9.6651	8.57029	0.468199	9.90304	8.36975	0.345487	0.406843
SH3TC2	10.0941	8.95285	0.453378	10.1678	8.6963	0.360614	0.406996
MISP3	6.25046	4.95195	0.406548	6.14502	4.85407	0.40868	0.407614
NEBL	10.4935	9.44602	0.483825	10.4644	8.87798	0.333001	0.408413
GIPC1	13.3791	12.1244	0.419095	13.367	12.0403	0.39869	0.408892
ZBTB20	7.60023	6.33134	0.414979	7.636	6.32488	0.403007	0.408993
PXDN	13.3359	12.0679	0.415251	13.3038	11.9921	0.40285	0.409051
DLL4	5.13495	3.73305	0.37843	4.79266	3.60805	0.439946	0.409188
HLA-B	9.27186	7.9484	0.399578	9.01777	7.76385	0.419309	0.409444
AK1	8.37257	6.94618	0.372061	8.16079	7.00078	0.447508	0.409784
LAMA3	16.2837	14.9948	0.40924	16.1572	14.8739	0.410835	0.410037
STAU2	9.4582	8.28896	0.444656	9.42238	8.01051	0.375825	0.410241
TRAM1	12.3164	11.249	0.477184	12.4877	10.9455	0.34337	0.410277
ULBP2	9.17848	7.86646	0.402757	9.15094	7.89246	0.417985	0.410371
NT5E	13.1822	12.0388	0.452701	13.2363	11.795	0.368241	0.410471
MAPK3	11.0797	9.76449	0.401873	10.8488	9.59443	0.419171	0.410522
CCSER1	5.03428	3.86853	0.445733	5.02113	3.60805	0.375511	0.410622
SLC16A4	10.1723	9.01898	0.449603	10.2501	8.82745	0.373027	0.411315
TSC22D2	10.3491	9.20874	0.453633	10.4146	8.97982	0.369907	0.41177
TIAM1	8.75923	7.42929	0.397786	8.68108	7.44929	0.42579	0.411788
FDPS	11.7432	10.5801	0.446544	11.8446	10.4422	0.378301	0.412422
RHOC	12.9574	11.6466	0.403122	12.8279	11.5825	0.42181	0.412466
IL18	12.8481	11.677	0.444063	13.0578	11.6662	0.38115	0.412606
BVES	8.22552	7.20408	0.492624	8.35104	6.76475	0.333026	0.412825
NPAS2	10.4756	9.28114	0.43694	10.4843	9.12548	0.38991	0.413425
SBDS	11.5453	10.2705	0.413263	11.6013	10.3287	0.413939	0.413601
STK3	9.84601	8.7978	0.483567	9.89646	8.35644	0.34388	0.413724
ATP6V1G1	11.4998	10.1341	0.388069	11.3996	10.2155	0.440079	0.414074
OAT	12.2349	10.9997	0.424785	12.2742	10.9646	0.403431	0.414108
DOK4	9.62117	8.38551	0.424649	9.5888	8.2833	0.404582	0.414616
HN1	12.1782	10.9196	0.417968	12.1428	10.8609	0.411265	0.414616
FAM219A	9.86154	8.55807	0.40515	9.88985	8.65342	0.424422	0.414786
CRELD1	9.99271	8.72588	0.415574	9.96254	8.69277	0.414727	0.41515
MELTF	11.4303	10.2402	0.438277	11.4152	10.0655	0.392362	0.41532
PWWP2B	9.751	8.44646	0.404852	9.62109	8.39166	0.426484	0.415668
TRIM36	6.48481	5.42105	0.478381	6.65101	5.14866	0.35298	0.415681
PCDHGB5	8.74812	7.53927	0.432611	8.79165	7.46594	0.398953	0.415782
LIMD2	5.83256	4.39104	0.368178	5.84418	4.73762	0.464399	0.416289
FBXO10	6.79116	5.52909	0.416945	6.85609	5.5902	0.415845	0.416395
CD151	14.1485	12.8191	0.397939	14.0966	12.8965	0.435242	0.416591
BTBD9	9.73422	8.30368	0.370991	9.4697	8.35644	0.462247	0.416619
PCDHA10	5.27251	4.08001	0.437544	5.42083	4.08474	0.396094	0.416819
SIK1	7.89714	6.8078	0.469978	8.20943	6.75117	0.363932	0.416955
ZNF823	7.20398	6.1286	0.474545	7.34767	5.87209	0.35959	0.417067
STXBP1	10.1792	8.91502	0.41635	10.1388	8.88108	0.418208	0.417279
GAREM2	7.31879	5.93062	0.382049	6.90964	5.7662	0.452677	0.417363
AP5B1	10.7365	9.4327	0.405059	10.5612	9.34342	0.429948	0.417503
DUSP8	4.86618	3.55451	0.402856	5.16855	3.959	0.432405	0.41763
WTIP	9.48964	8.13697	0.391568	9.31788	8.14564	0.443732	0.41765
MRVI1	5.99476	4.45546	0.344053	5.63271	4.60823	0.491589	0.417821
PHLPP2	8.69516	7.60023	0.468161	8.85074	7.40681	0.367564	0.417862
AQP9	5.22826	3.73305	0.35473	4.65962	3.60805	0.482444	0.418587
RAB9B	5.22826	3.73305	0.35473	4.85393	3.80783	0.484277	0.419503
MAP1LC3B	11.9172	10.6933	0.428134	11.9548	10.6743	0.411649	0.419892
SLC35C1	11.5096	10.1413	0.387341	11.375	10.2313	0.452613	0.419977
TRPM4	10.8455	9.55762	0.409549	10.7446	9.52876	0.430525	0.420037
CLIP1	11.8612	10.6196	0.42289	11.8087	10.5484	0.417451	0.420171
OXTR	8.45228	7.36747	0.471455	8.46224	7.0235	0.368888	0.420171
GMIP	10.0631	8.81331	0.420522	10.0166	8.76504	0.41998	0.420251
FNBP1	9.78397	8.57029	0.431167	9.81679	8.52847	0.409429	0.420298
SOCS1	6.6055	5.52909	0.474208	6.75724	5.31284	0.367447	0.420827
YPEL5	11.361	10.2083	0.4498	11.5345	10.1832	0.391936	0.420868
PDP1	10.5209	9.46741	0.481805	10.7409	9.26728	0.360073	0.420939
TMEM63A	10.6704	9.4917	0.441739	10.5211	9.20184	0.400742	0.42124
DYNC1H1	14.6356	13.266	0.386993	14.2233	13.0889	0.455518	0.421255
ATG9B	6.98102	5.94983	0.489304	7.39525	5.89734	0.354066	0.421685
LRCH4	9.21118	7.98541	0.427568	9.18104	7.91686	0.416335	0.421952
PCBP4	10.5531	9.30693	0.421556	10.648	9.40501	0.422502	0.422029
SAMD9	12.6899	11.6419	0.483647	12.6632	11.1919	0.360663	0.422155
GRHL3	8.46137	7.32472	0.454815	8.36064	7.00078	0.389618	0.422217
TMEM56	6.20731	5.06797	0.453968	6.5016	5.14866	0.391493	0.422731
MYO6	11.9619	10.8785	0.47191	12.0708	10.6509	0.37374	0.422825
TBC1D19	8.60778	7.32472	0.410924	8.51047	7.30866	0.434728	0.422826
AAK1	11.3309	10.1525	0.44185	11.2846	9.97701	0.403991	0.422921
STX11	6.83403	5.62909	0.433787	6.77178	5.49282	0.412091	0.422939
CLDN23	6.81988	5.52909	0.408727	6.65101	5.45872	0.43761	0.423168
PLIN3	12.0409	10.7319	0.403588	11.9405	10.7694	0.444073	0.423831
MUC15	4.59751	3.55451	0.48532	5.0722	3.60805	0.36245	0.423885
COMMD9	10.51	9.23776	0.41402	10.4374	9.23614	0.434886	0.424453
MSRA	9.7894	8.5642	0.427738	9.7435	8.49648	0.421317	0.424528
VPS18	10.4067	9.10127	0.404592	10.1773	9.00845	0.444775	0.424684
TM2D2	10.1187	8.84634	0.413987	10.1021	8.9026	0.435433	0.42471
C18orf25	10.3746	9.23007	0.452331	10.5222	9.19189	0.397692	0.425012
UBAP1	11.8172	10.5519	0.416005	11.7414	10.5386	0.43442	0.425213
NOMO3	5.18245	3.86853	0.402226	6.16739	5.01005	0.44834	0.425283
ZNF281	10.4632	9.37118	0.46909	10.5921	9.20184	0.381508	0.425299
TIMM17A	10.6753	9.4625	0.431424	10.8291	9.57543	0.419382	0.425403
MMP13	4.80456	3.73305	0.475822	5.02113	3.60805	0.375511	0.425667
TPRA1	11.2054	9.84839	0.390404	11.052	9.93587	0.461334	0.425869
SLC35G2	7.42508	6.05982	0.388162	7.39525	6.28754	0.464029	0.426096
HLA-B	12.2537	10.925	0.398132	11.995	10.8562	0.454122	0.426127
TOR4A	10.0897	8.75829	0.397387	10.057	8.92079	0.454938	0.426162
HOXC13	8.91293	7.69828	0.430879	8.6618	7.41541	0.421502	0.42619
C10orf67	6.02004	4.68033	0.395102	5.92572	4.79727	0.457407	0.426254
TRIO	13.1464	11.937	0.432448	13.0781	11.8275	0.42028	0.426364
TMEM8A	11.1218	9.76847	0.391376	10.9171	9.80328	0.46208	0.426728
ACADS	8.18765	6.84873	0.395314	8.17174	7.04586	0.458221	0.426767
CABP4	5.22826	3.86853	0.389656	4.91223	3.80783	0.465096	0.427376
MARCH2	9.35468	8.00356	0.391987	9.01473	7.90471	0.463288	0.427638
ATP6V1D	11.2408	10.0062	0.42498	11.1788	9.96538	0.431256	0.428118
ARHGEF37	11.1579	10.1434	0.494979	11.1576	9.68943	0.361444	0.428211
C2CD2L	9.15065	7.8515	0.406366	9.29053	8.14047	0.450608	0.428487
PLPP2	10.2412	9.05203	0.438568	10.1895	8.93279	0.418506	0.428537
TOR1B	9.91875	8.66735	0.420041	9.82027	8.63149	0.438675	0.429358
FAM127A	11.2355	9.95123	0.410588	11.1733	10.0156	0.448218	0.429403
MINDY2	9.73235	8.57637	0.448761	9.89481	8.60923	0.410206	0.429483
ADAMTS12	5.3153	3.98152	0.396727	5.0722	3.959	0.462269	0.429498
TAGLN2	13.9572	12.6415	0.401727	13.89	12.7615	0.457416	0.429572
ME1	10.3094	9.24158	0.477029	10.3761	8.98847	0.382199	0.429614
GCH1	8.79203	7.60619	0.439569	8.88107	7.63001	0.420139	0.429854
SYTL3	9.33008	8.33267	0.500899	9.43606	7.95858	0.359117	0.430008
IGSF11	5.08562	4.08001	0.498059	5.0722	3.60805	0.36245	0.430255
CRY1	7.57528	6.24139	0.396695	7.52067	6.41412	0.464405	0.43055
KLF4	10.6724	9.57439	0.467164	11.1403	9.79673	0.394048	0.430606
CNGA1	6.81988	5.74454	0.474557	7.16196	5.79345	0.387289	0.430923
PACSIN1	5.03428	3.86853	0.445733	5.0722	3.80783	0.416282	0.431008
MACF1	13.6414	12.3623	0.412045	13.3594	12.2086	0.450378	0.431211
EVPL	12.1141	10.8661	0.421053	11.9792	10.8041	0.442856	0.431954
RASA1	11.6152	10.5823	0.48874	11.6757	10.2614	0.375185	0.431963
HOXB6	6.35287	5.10437	0.420885	6.23243	5.05797	0.443048	0.431967
KRT6A	16.2752	14.9137	0.38919	16.1184	15.0442	0.474953	0.432071
RHPN2	8.09718	6.99252	0.465015	8.16628	6.84358	0.399787	0.432401
ZBTB42	7.96908	6.76566	0.434246	7.72799	6.51427	0.431153	0.4327
SUN3	5.35674	4.32228	0.488199	5.21414	3.80783	0.377277	0.432738
FADS2	12.4153	11.3167	0.466986	12.2963	10.9719	0.399326	0.433156
ZNF827	10.5382	9.3937	0.452355	10.556	9.28377	0.414027	0.433191
HOXC9	8.0315	6.59551	0.369594	7.99801	6.98928	0.496982	0.433288
OGDH	12.6242	11.2962	0.398324	12.3741	11.2796	0.468308	0.433316
STRBP	9.54412	8.30001	0.422168	9.47634	8.30656	0.444489	0.433329
FEM1C	9.80911	8.73947	0.476439	10.0029	8.64615	0.390453	0.433446
OVCH2	5.77397	4.51616	0.418178	5.53094	4.38032	0.450432	0.434305
GBP3	10.873	9.86461	0.497094	11.0122	9.58496	0.371839	0.434466
PTS	10.1086	8.89573	0.431411	10.2501	9.0586	0.43785	0.43463
TTC7A	11.5973	10.3265	0.414424	11.446	10.3105	0.455173	0.434799
C1QTNF6	9.51386	8.35757	0.448664	9.58676	8.3385	0.420956	0.43481
IFIH1	11.342	10.312	0.489698	11.294	9.90423	0.381616	0.435657
CD63	13.4885	12.1983	0.408892	13.4339	12.3233	0.463105	0.435998
USP6NL	10.0237	9.00103	0.492201	10.165	8.76839	0.379813	0.436007
LTBP2	12.4249	11.3701	0.481369	12.3505	10.9971	0.391363	0.436366
ESYT3	6.70136	5.60477	0.467622	6.53619	5.23335	0.405328	0.436475
HIST2H2BF	5.68109	4.51616	0.445984	5.89907	4.67476	0.428	0.436992
EGFL7	8.0315	6.67746	0.391194	7.82837	6.77819	0.48291	0.437052
DNAH5	7.58365	6.37425	0.43245	7.52067	6.34319	0.442123	0.437287
SPRR3	5.86095	4.57362	0.409708	5.56572	4.46183	0.465262	0.437485
TRADD	9.6413	8.39928	0.42278	9.53048	8.3873	0.452761	0.437771
USP44	4.98075	3.98152	0.500265	5.02113	3.60805	0.375511	0.437888
C1QTNF2	5.54649	4.45546	0.469425	5.25817	3.959	0.406361	0.437893
PAX8	6.57205	5.24042	0.39732	6.519	5.45872	0.479539	0.438429
RASSF5	9.18124	7.97164	0.432391	9.13425	7.96445	0.444482	0.438436
TGFBR2	15.0034	13.8908	0.462437	14.8497	13.5812	0.415082	0.438759
TMEM63C	8.6913	7.37447	0.401417	8.48437	7.41541	0.476663	0.43904
CHIC1	5.51064	4.24835	0.416883	5.49523	4.38032	0.461719	0.439301
PCDHGB2	5.91604	4.82386	0.469053	6.18941	4.9083	0.41148	0.440266
EIF4EBP2	11.7516	10.6651	0.470919	11.6948	10.4072	0.409628	0.440274
MFSD12	11.3832	10.0913	0.408409	11.2827	10.2031	0.473158	0.440783
CABLES1	8.26241	7.14793	0.461855	8.14421	6.89382	0.420335	0.441095
SLC52A2	11.4023	10.1382	0.416387	11.2366	10.1347	0.465895	0.441141
AGPAT2	10.2398	9.01451	0.427702	10.0377	8.9026	0.455291	0.441496
SHROOM3	12.4675	11.3104	0.448398	12.2023	11.0014	0.434991	0.441694
GPX1	12.9683	11.6528	0.40176	12.8345	11.7814	0.481915	0.441838
HSPB8	6.04487	5.03048	0.495039	6.37343	5.01005	0.388673	0.441856
KLHL24	9.90049	8.71766	0.440488	9.84098	8.66786	0.443459	0.441974
TYRO3	9.0214	7.77429	0.421292	8.71889	7.60769	0.462908	0.4421
CASZ1	10.1997	9.03229	0.44523	10.2371	9.05036	0.439286	0.442258
KLHL7	9.56956	8.54884	0.492868	9.78863	8.43872	0.392317	0.442592
PGRMC2	10.9501	9.88675	0.478524	11.1849	9.88738	0.406837	0.44268
PLAC8	5.80358	4.73016	0.475191	5.665	4.38032	0.410463	0.442827
KIF13B	11.1502	9.98356	0.445452	10.7994	9.61692	0.44059	0.443021
ATP10A	9.29238	8.06966	0.428475	9.06256	7.93489	0.457655	0.443065
IFIT5	10.1997	9.08646	0.462267	10.1814	8.94469	0.424348	0.443308
PJA1	9.83556	8.64152	0.437077	9.74716	8.59419	0.449698	0.443388
HLA-B	10.4381	9.0822	0.390679	9.91612	8.90869	0.497432	0.444055
SH3BP5L	10.4655	9.19697	0.41508	10.1975	9.12024	0.473922	0.444501
NIPA1	9.81621	8.71766	0.466987	9.85123	8.60923	0.422786	0.444886
FAM65A	11.3688	10.245	0.458866	11.3348	10.1268	0.432889	0.445878
FYN	10.7129	9.38854	0.399322	10.6548	9.63356	0.492684	0.446003
CYP2S1	7.1143	5.87134	0.422505	6.88312	5.79345	0.469868	0.446187
LEPR	8.83812	7.70385	0.455563	8.85414	7.65924	0.436816	0.446189
SPRED3	8.37738	7.13972	0.424059	8.33652	7.24251	0.468459	0.446259
HES4	8.99347	7.81599	0.442122	9.11453	7.96445	0.450598	0.44636
GDPD1	6.04487	4.95195	0.468814	6.14502	4.9083	0.424336	0.446575
EVA1A	8.47939	7.46252	0.494189	8.58608	7.26172	0.399329	0.446759
PDZK1	5.71276	4.51616	0.436302	5.665	4.53749	0.457707	0.447004
RUBCN	10.4756	9.41079	0.478024	10.5243	9.26253	0.417031	0.447527
ULK2	9.20578	7.93428	0.414228	9.18375	8.13008	0.481741	0.447984
PITPNC1	9.38605	8.09103	0.407533	9.24462	8.21119	0.488549	0.448041
ACVR2A	8.39173	7.33911	0.482094	8.59016	7.31786	0.414	0.448047
CRIM1	5.54649	4.32228	0.428031	5.63271	4.53749	0.468067	0.448049
TMEM236	5.08562	3.98152	0.465192	5.02113	3.80783	0.431283	0.448237
ATG4A	9.17296	8.14925	0.49185	9.18375	7.88011	0.405102	0.448476
DLX3	7.81432	6.73322	0.47267	7.57949	6.34319	0.424458	0.448564
LYNX1	9.15065	7.89592	0.41907	8.94307	7.88011	0.478646	0.448858
FICD	7.42508	6.37425	0.482691	7.57124	6.30634	0.416128	0.449409
MAN2A2	10.0176	8.87125	0.451777	9.99832	8.83706	0.447119	0.449448
ARHGEF17	11.3791	10.2695	0.463447	11.309	10.1098	0.435511	0.449479
MGAT5	10.9812	9.83073	0.45047	10.9146	9.75848	0.448709	0.449589
MLPH	9.58212	8.35757	0.427932	9.48074	8.396	0.471476	0.449704
DOCK9	11.9135	10.6751	0.423839	11.827	10.7559	0.47597	0.449905
ALPP	7.86321	6.67746	0.439596	7.2884	6.16918	0.460342	0.449969
PCDHGA4	6.06926	4.77794	0.408577	5.63271	4.60823	0.491589	0.450083
SERINC1	12.4675	11.3948	0.475418	12.5252	11.2913	0.425177	0.450298
HLA-B	10.9773	9.73901	0.423883	10.7336	9.66626	0.477216	0.45055
SERAC1	8.54073	7.38837	0.44989	8.49312	7.34513	0.451254	0.450572
ZNF114	6.13998	5.13976	0.499923	5.92572	4.60823	0.401232	0.450578
TTC19	11.2591	10.1965	0.47878	11.3631	10.1203	0.422554	0.450667
KRT9	5.64867	4.45546	0.437327	5.84418	4.73762	0.464399	0.450863
TJP1	7.48884	6.28708	0.434744	7.36689	6.26849	0.467035	0.45089
FBXO33	9.22192	8.11627	0.464694	9.07718	7.8863	0.438033	0.451364
MLLT3	6.76185	5.55479	0.43315	6.80044	5.71002	0.469624	0.451387
CTTNBP2NL	11.0032	10.0051	0.500666	11.016	9.70176	0.402133	0.451399
STAT1	12.4514	11.3779	0.475193	12.2441	11.0205	0.428216	0.451705
PPDPF	12.7461	11.5162	0.426345	12.6078	11.5415	0.477525	0.451935
ERBB2	12.3183	11.0627	0.418829	12.1545	11.1124	0.485599	0.452214
IL34	7.2781	6.00591	0.414031	6.94853	5.92214	0.490936	0.452484
FAIM	8.67576	7.65871	0.494128	8.81279	7.53067	0.411193	0.45266
LANCL2	9.04578	7.89105	0.449151	9.09454	7.96445	0.456885	0.453018
CDS1	10.9273	9.86088	0.477497	11.0371	9.81467	0.428558	0.453028
TECPR1	10.123	9.0212	0.46594	10.0688	8.88726	0.44088	0.45341
SPACA4	5.35674	4.32228	0.488199	5.63271	4.38032	0.419754	0.453976
B3GLCT	7.73397	6.63121	0.465625	7.69038	6.51427	0.442543	0.454084
SELENOT	10.8403	9.80641	0.488392	10.9595	9.70875	0.420226	0.454309
TUBB6	13.1476	12.0566	0.469427	13.0976	11.9114	0.439456	0.454442
CDC42EP3	11.9234	10.8035	0.460136	11.8257	10.6707	0.449081	0.454608
AFAP1L2	10.6743	9.61624	0.480261	10.6971	9.47643	0.429086	0.454674
C19orf33	8.34827	7.06368	0.41049	8.20411	7.2033	0.499718	0.455104
TCP11L1	10.3746	9.26055	0.461989	10.3414	9.18438	0.448452	0.45522
ANKRD44	5.3153	4.08001	0.424756	5.42083	4.38032	0.486156	0.455456
UPRT	8.51038	7.2881	0.428603	8.43977	7.38946	0.482862	0.455733
HERC3	9.82152	8.67303	0.451099	9.67593	8.55977	0.461321	0.45621
CFL1	14.8981	13.7359	0.446823	14.8133	13.7127	0.466326	0.456574
BNIPL	6.18522	4.91074	0.413373	6.18941	5.1917	0.500796	0.457084
LASP1	13.8131	12.663	0.450601	13.621	12.5133	0.464022	0.457311
C12orf75	9.91048	8.86134	0.483255	9.95147	8.74135	0.432234	0.457744
PNPLA2	12.2041	11.1204	0.471817	12.2966	11.1255	0.444089	0.457953
TP53BP2	10.3257	9.27556	0.482921	10.254	9.04761	0.433362	0.458142
ZFYVE26	10.5296	9.38854	0.453438	10.3132	9.20184	0.462851	0.458145
PFN4	5.94278	4.77794	0.446015	5.69654	4.60823	0.470312	0.458163
SLC39A4	9.36441	8.21302	0.450193	9.20787	8.10906	0.466901	0.458547
ID2	8.0376	6.98338	0.481557	7.72799	6.53029	0.435968	0.458763
ACAT2	10.522	9.4625	0.479807	10.5349	9.34342	0.437841	0.458824
OCIAD2	13.5663	12.409	0.448342	13.5549	12.464	0.46947	0.458906
SLFN12	8.62406	7.57616	0.483669	8.61042	7.40681	0.434187	0.458928
CAMSAP1	10.9363	9.70479	0.42587	10.7418	9.71918	0.492211	0.45904
PCDHGA1	6.04487	4.91074	0.45561	6.12229	5.01005	0.462577	0.459093
GALNT6	11.0708	9.95938	0.462839	11.0099	9.8781	0.456336	0.459588
APOL2	10.4079	9.29225	0.461479	10.434	9.307	0.457859	0.459669
SNX18	9.07864	7.98997	0.470194	9.08878	7.93489	0.449412	0.459803
CBX6	11.4401	10.4306	0.496734	11.4129	10.1718	0.423047	0.45989
TMEM120A	9.08747	7.96239	0.458476	8.99638	7.8863	0.463268	0.460872
MSANTD3	9.48964	8.41631	0.475222	9.48733	8.3249	0.446758	0.46099
SPTBN1	14.311	13.1247	0.439444	14.1245	13.082	0.48548	0.462462
FRMD6	12.5201	11.4421	0.473677	12.4609	11.3144	0.451746	0.462711
LRP10	13.8662	12.6526	0.431193	13.687	12.6709	0.494456	0.462825
ARF4	12.499	11.4598	0.486601	12.5332	11.3479	0.439732	0.463167
FIG4	9.128	8.02593	0.465849	9.15646	8.03857	0.460767	0.463308
ADAM21	5.51064	4.45546	0.481238	5.45855	4.29168	0.445386	0.463312
BAHD1	10.097	8.94348	0.449534	9.93871	8.87176	0.477325	0.46343
CNN3	12.2166	11.1121	0.465064	12.2894	11.1794	0.46329	0.464177
ATP7A	8.2882	7.2352	0.481967	8.39375	7.23281	0.447219	0.464593
ARAP2	11.6818	10.6378	0.484971	11.6631	10.4948	0.444917	0.464944
PARVA	12.068	10.8901	0.442005	11.8704	10.8372	0.488597	0.465301
TRIM62	8.53212	7.4756	0.480789	8.54035	7.38946	0.450347	0.465568
DNAJB9	9.54626	8.41969	0.458004	9.75082	8.67144	0.473234	0.465619
PDZD7	6.80559	5.60477	0.435027	6.46615	5.45872	0.497432	0.46623
PHF23	10.743	9.6526	0.469621	10.7308	9.62063	0.463248	0.466434
HPS5	12.2392	11.2217	0.493953	12.1635	10.9755	0.43893	0.466442
ABTB2	10.8662	9.79604	0.476271	10.7718	9.64089	0.456625	0.466448
GNB1	13.8409	12.7372	0.465319	13.8107	12.715	0.467902	0.46661
C19orf25	10.1723	9.02565	0.451687	10.0482	8.99992	0.483556	0.467621
SORCS2	6.39184	5.24042	0.450181	6.42979	5.38779	0.485655	0.467918
CASP6	9.18673	8.12044	0.477545	9.30302	8.18131	0.459547	0.468546
TPM4	14.404	13.3001	0.465242	14.3842	13.3012	0.472019	0.46863
SLC9A3R2	10.2993	9.2511	0.483561	10.3145	9.17431	0.453713	0.468637
RNF14	10.7871	9.7498	0.487246	10.8573	9.70875	0.451073	0.469159
NSDHL	10.0749	8.92457	0.450509	9.99371	8.96236	0.489254	0.469881
CSTB	12.0985	11.007	0.469288	12.1104	11.0233	0.470698	0.469993
HLA-C	12.2622	11.138	0.458761	12.0907	11.0373	0.481803	0.470282
DLGAP4	11.6374	10.5105	0.45788	11.6233	10.5754	0.48366	0.47077
PPP3CC	8.90295	7.73679	0.445605	8.93346	7.92289	0.496352	0.470978
KIF5B	12.6665	11.5727	0.468505	12.5576	11.482	0.474467	0.471486
LIMCH1	12.8578	11.7706	0.470658	12.6788	11.5972	0.472496	0.471577
SUMF1	11.0461	9.90857	0.454539	10.8875	9.85621	0.489273	0.471906
LYST	9.21118	8.18149	0.489814	9.20787	8.07154	0.454912	0.472363
TOB1	10.6155	9.58045	0.487991	10.6012	9.47643	0.458578	0.473284
ARL6IP5	12.1782	11.1764	0.499397	12.2428	11.0837	0.447807	0.473602
ABHD8	8.70284	7.67013	0.48879	8.60639	7.4824	0.458823	0.473807
EPHB2	12.1309	11.0605	0.476195	12.0297	10.9462	0.471909	0.474052
C20orf24	9.56746	8.43648	0.456606	9.44285	8.42178	0.492752	0.474679
LEPROTL1	9.78759	8.72588	0.479064	9.77613	8.68924	0.470773	0.474919
PERP	14.247	13.1833	0.478391	14.3458	13.2614	0.471593	0.474992
SYNPO2	5.54649	4.39104	0.448926	5.45855	4.46183	0.501139	0.475033
GNPTAB	10.7661	9.68667	0.473202	10.6819	9.62249	0.479839	0.476521
DAP	11.468	10.3786	0.46997	11.3762	10.3276	0.483457	0.476713
FAM118B	8.88954	7.86646	0.492064	8.83705	7.72982	0.464183	0.478124
KRT85	5.3153	4.24835	0.477328	5.59963	4.53749	0.478923	0.478125
RPS27L	11.4942	10.4662	0.490383	11.4766	10.38	0.467616	0.478999
TNFSF4	5.08562	3.98152	0.465192	5.21414	4.19408	0.493098	0.479145
ZNF704	7.85632	6.8078	0.483463	7.5877	6.51427	0.475185	0.479324
FBXL2	9.42838	8.35404	0.474889	9.42008	8.37416	0.484333	0.479611
BORCS6	7.80004	6.72224	0.473752	7.60399	6.5618	0.485592	0.479672
TRIM21	10.6002	9.52817	0.475658	10.4777	9.43062	0.483958	0.479808
PANX1	11.3916	10.3201	0.475841	11.2314	10.1894	0.48568	0.480761
TPRG1L	11.6198	10.5278	0.469117	11.5408	10.5188	0.492436	0.480776
SDCBP2	11.1347	10.0385	0.467738	11.1192	10.1045	0.494906	0.481322
DYNLL1	12.4094	11.3185	0.469475	12.314	11.2948	0.493413	0.481444
RBP1	8.37738	7.36043	0.494159	8.20943	7.12149	0.470431	0.482295
REXO2	11.7936	10.7622	0.489238	11.7888	10.72	0.476709	0.482973
KCTD10	11.4685	10.4719	0.501171	11.4527	10.3524	0.466407	0.483789
AHCYL2	9.89379	8.83119	0.478768	9.83755	8.81453	0.492085	0.485426
CXCL16	11.2856	10.2325	0.481954	11.1452	10.115	0.489672	0.485813
RAB5A	11.2322	10.2297	0.499136	11.2228	10.1693	0.481785	0.49046
OPA3	10.4473	9.43938	0.497253	10.4295	9.3855	0.484988	0.491121
WWC2	10.2968	9.26995	0.490782	10.1177	9.0991	0.493588	0.492185
GOLPH3	11.4781	10.444	0.488316	11.4181	10.4072	0.496221	0.492268
IGF2R	13.1817	12.1708	0.496238	13.103	12.0688	0.488309	0.492274
TNFSF13	7.78562	6.76566	0.493132	7.65956	6.65235	0.497507	0.495319
SEC11C	9.34735	8.33983	0.497402	9.54318	8.52451	0.493574	0.495488
RHBDL2	8.3629	7.35336	0.496705	8.42154	7.41541	0.497879	0.497292
PIK3IP1	8.88279	7.88617	0.501171	8.92378	7.92289	0.499693	0.500432
